# Supplementary material for: Identification of 613 new loci associated with heel bone mineral density and a polygenic risk score for bone mineral density, osteoporosis and fracture
Source: PLoS One. 2018 Jul 26;13(7):e0200785. doi: 10.1371/journal.pone.0200785 (PMC6062019; doi:10.1371/journal.pone.0200785)
Supplement: S1 Table — (XLSX) [file pone.0200785.s001.xlsx]

## Sheet: SumStats2.txt
						BMD			Fracture
SNP	CHR	BP	ALLELE1	ALLELE0	A1FREQ	BETA	SE	P_BOLT_LMM	BETA	SE	P_BOLT_LMM_INF		Allele1. Effect allele.
rs28569249	1	863641	G	A	0.884147	-0.0222463	0.00337851	2.4e-11	0.00380449	0.0011932	0.0014		Allele0. Other allele.
rs750299097	1	875159	AGCCAGTGGACGCCGACCT	A	0.369546	0.0116745	0.00217524	4.6e-09	-0.00189464	0.000766978	0.014		A1Freq. Effect allele frequency.
rs4372192	1	876499	A	G	0.0540312	0.0262929	0.00456733	1.8e-09	-0.000965507	0.00161627	0.55		BMD_Beta. Beta value (BMD T-score units) from LMM analysis for heel BMD.
rs6605066	1	877715	C	G	0.0643589	0.0245085	0.00424103	9.1e-10	-0.00197258	0.00150106	0.19		BMD_SE. Standard Error (BMD T-score units) from LMM analysis for heel BMD.
1:878906_CTTT_C	1	878906	CTTT	C	0.0849827	0.0257222	0.00387801	1.9e-12	-0.00219744	0.00136961	0.11		BMD_ P_BOLT_LMM. P-value from LMM analysis for heel BMD.
rs6605067	1	879676	G	A	0.0549165	0.0270747	0.0045329	7.5e-10	-0.00101806	0.00160513	0.53		Fracture_Beta. Beta value (BMD T-score units) from LMM analysis for fracture.
rs2839	1	879687	T	C	0.0539617	0.0263159	0.00456841	1.8e-09	-0.000929536	0.00161643	0.57		Fracture_SE. Standard Error (BMD T-score units) from LMM analysis for fracture.
rs3748592	1	880238	A	G	0.0540679	0.0259434	0.00456056	2.7e-09	-0.000950086	0.00161373	0.56		Fracture_ P_BOLT_LMM. P-value from LMM analysis for fracture.
rs2272757	1	881627	G	A	0.347135	0.0132263	0.00216986	5.2e-11	-0.00192563	0.000765959	0.012
rs2340582	1	882803	A	G	0.0540285	0.0260371	0.00456387	2.5e-09	-0.000883436	0.0016149	0.58
rs764185019	1	884551	GAGAA	G	0.369625	0.0128749	0.00222429	4.9e-10	-0.00186525	0.000784893	0.017
rs4246503	1	884815	A	G	0.0540361	0.0259317	0.00456431	2.8e-09	-0.000866595	0.00161511	0.59
rs4970377	1	885676	C	A	0.0585971	0.0273686	0.0043986	6.9e-11	-0.00176595	0.00155631	0.26
rs4970452	1	885689	G	A	0.0535686	0.0256736	0.0045871	5.1e-09	-0.000681687	0.00162289	0.67
rs4970376	1	885699	A	G	0.0540082	0.0259139	0.00456693	3e-09	-0.000840524	0.00161602	0.6
rs4970375	1	886006	T	C	0.0540215	0.0258438	0.00456442	3.2e-09	-0.000837663	0.00161511	0.6
rs763529042	1	886182	TG	T	0.0540186	0.0259319	0.00456723	2.8e-09	-0.000768232	0.00161617	0.63
rs200933182	1	886186	C	CAG	0.0540187	0.0259315	0.00456722	2.8e-09	-0.000768099	0.00161617	0.63
rs10465242	1	886788	G	A	0.0913843	0.0275979	0.00360117	8e-16	-0.00186562	0.00127807	0.14
rs10465241	1	886817	C	T	0.0915716	0.0278942	0.00360647	3.3e-16	-0.00205353	0.00127923	0.11
rs3748595	1	887560	A	C	0.0585666	0.0274395	0.00439712	5.9e-11	-0.00175717	0.00155583	0.26
rs3828047	1	887801	A	G	0.054016	0.0257166	0.00456409	3.6e-09	-0.000821768	0.00161515	0.61
rs3748596	1	888639	T	C	0.0536046	0.0262419	0.00461903	2.8e-09	-0.000898646	0.00163395	0.58
rs3748597	1	888659	T	C	0.0540528	0.025769	0.00456087	3.2e-09	-0.000791248	0.00161401	0.62
rs13303056	1	889158	G	C	0.0540449	0.0255669	0.00456441	4.9e-09	-0.000830525	0.00161564	0.61
rs3828049	1	889238	G	A	0.946612	-0.025954	0.00459248	3.1e-09	0.000453706	0.00162469	0.78
rs13303206	1	889638	G	C	0.0654806	0.0249794	0.00417712	2.1e-10	-0.00188439	0.00147897	0.2
rs13303051	1	889713	C	A	0.0655981	0.0248649	0.00417162	2.4e-10	-0.00190363	0.00147706	0.2
rs13302957	1	891021	G	A	0.0554392	0.0261081	0.00451345	2.4e-09	-0.000719092	0.00160152	0.65
rs13303065	1	891059	C	T	0.34711	0.0131168	0.00216953	6e-11	-0.0019531	0.000765867	0.011
rs13303106	1	891945	A	G	0.347057	0.0131645	0.00217195	6.2e-11	-0.00197118	0.00076668	0.01
rs13303227	1	892745	G	A	0.0540443	0.0259361	0.00456254	2.8e-09	-0.000921557	0.00161446	0.57
rs4970371	1	893280	G	A	0.053615	0.0258122	0.0045801	4e-09	-0.000767785	0.00162046	0.64
rs767786658	1	893461	TC	T	0.0540108	0.0258391	0.00456508	3.2e-09	-0.000838391	0.00161525	0.6
rs6605068	1	893462	C	T	0.064693	0.0267747	0.00439904	6.5e-10	-0.0011407	0.00155535	0.46
rs6605069	1	893631	A	G	0.0632147	0.0263111	0.00424177	6.1e-11	-0.00198747	0.00150149	0.19
rs4970445	1	893719	G	A	0.0646109	0.0265933	0.00420333	4.5e-11	-0.0019678	0.00149135	0.19
rs13303010	1	894573	G	A	0.091305	0.0282369	0.00358715	8.3e-17	-0.0024242	0.00127301	0.057
rs13303327	1	895706	G	A	0.0866789	0.0289903	0.00367471	8.2e-17	-0.0023713	0.00130389	0.069
rs113491766	1	895755	A	AG	0.0911373	0.028328	0.00359563	8.1e-17	-0.00242569	0.00127576	0.057
rs112905931	1	896271	C	T	0.357286	0.0131023	0.00218998	1.5e-10	-0.00171595	0.000772711	0.026
rs28393498	1	896476	A	G	0.0530227	0.0264086	0.00461153	3.1e-09	-0.00110042	0.00163219	0.5
rs4970441	1	897325	G	C	0.064064	0.0270744	0.00421974	2.8e-11	-0.00196972	0.00149436	0.19
rs13303229	1	897564	T	C	0.062935	0.0269282	0.0042597	3.1e-11	-0.00201998	0.00150772	0.18
rs6696971	1	897738	C	T	0.93741	-0.0264969	0.00425903	6.1e-11	0.00170387	0.00150751	0.26
rs41285808	1	898467	C	T	0.946681	-0.0264465	0.00460289	2.5e-09	0.000520218	0.00162767	0.75
rs6677386	1	899928	G	C	0.0678084	0.0273743	0.00425856	1e-11	-0.00155789	0.00150649	0.3
rs143296006	1	899937	G	T	0.0954967	0.0239021	0.00369248	7.3e-12	-0.00246678	0.00130236	0.058
rs147467971	1	899938	G	C	0.0954967	0.0239036	0.00369248	7.3e-12	-0.00246687	0.00130236	0.058
rs71509448	1	899942	G	A	0.0960071	0.0241871	0.00368484	5e-12	-0.00253379	0.00129996	0.051
rs6669071	1	899989	A	C	0.091714	0.022597	0.00372858	2.1e-10	-0.0016546	0.00131469	0.21
rs28754834	1	900001	G	A	0.0612009	0.0246215	0.00441938	6.1e-09	-0.00067144	0.00156545	0.67
rs6704181	1	900009	C	G	0.0612007	0.0246215	0.00441946	6.1e-09	-0.000670044	0.00156547	0.67
rs371055706	1	900010	G	GC	0.0612007	0.0246208	0.00441947	6.1e-09	-0.000670133	0.00156548	0.67
rs4970435	1	900285	C	T	0.0637321	0.0270261	0.00425927	4.6e-11	-0.00192935	0.00150921	0.2
rs4970434	1	900286	A	G	0.0532878	0.0259866	0.00462793	4.6e-09	-0.000670351	0.00163689	0.68
1:900717_CTTAT_C	1	900717	CTTAT	C	0.357739	0.0126384	0.00218452	6.2e-10	-0.00142385	0.000770851	0.065
rs3935066	1	900730	G	A	0.0849313	0.0273895	0.00373346	9.3e-15	-0.00164466	0.00132472	0.21
rs9697711	1	900972	T	G	0.0539378	0.0260907	0.00459744	3.7e-09	-0.000495233	0.00162588	0.76
rs13303351	1	901023	T	C	0.0548286	0.0268719	0.00456581	1.7e-09	-0.000710405	0.00161605	0.66
rs13303160	1	901559	G	A	0.0897637	0.0282738	0.00364658	2e-16	-0.0023144	0.00129337	0.074
rs13302996	1	901607	C	G	0.0634753	0.0264486	0.00426311	8.6e-11	-0.00178156	0.00150951	0.24
rs80125161	1	902764	C	G	0.322037	0.0131153	0.00229906	1.9e-10	-0.00152004	0.000811528	0.061
rs7524174	1	902997	G	A	0.131228	0.0242523	0.00314445	1.2e-16	-0.00189015	0.00111099	0.089
rs6696281	1	903104	C	T	0.964409	-0.0323412	0.00566446	2.8e-10	0.00440044	0.00201636	0.029
rs74753218	1	2839664	C	G	0.98682	0.0665878	0.00944729	1.4e-12	-7.77955e-05	0.00329946	0.98
rs192906904	1	2861522	C	T	0.98323	0.0628237	0.00821982	2.9e-15	-0.000715169	0.00287522	0.8
rs147637143	1	2872424	C	T	0.983898	0.064568	0.008383	2.9e-15	-0.000290252	0.00293398	0.92
rs78315347	1	2874564	C	G	0.984619	0.0660936	0.00850686	1.4e-15	-0.000856265	0.00297495	0.77
rs74407459	1	2877386	A	G	0.984559	0.0648822	0.0084747	2.5e-15	-0.000929988	0.00296355	0.75
rs114940840	1	2878541	C	T	0.984487	0.0629883	0.00834615	7.4e-15	-0.0010364	0.0029191	0.72
rs116704679	1	2879813	G	C	0.986541	0.078523	0.00919465	7.5e-20	-0.000797622	0.00321753	0.8
rs2842925	1	2886356	A	G	0.032121	-0.0406735	0.0058508	1.1e-12	0.00179818	0.00207538	0.39
rs72853379	1	2886903	G	A	0.979861	0.0769893	0.00733968	1.1e-27	-0.001254	0.00258635	0.63
rs149101396	1	2895482	C	T	0.981257	0.0862146	0.00780863	7e-31	-0.00114445	0.00273215	0.68
rs139603701	1	2904634	A	G	0.983471	0.104629	0.00836482	1.9e-38	0.000248896	0.00291964	0.93
1:2921939_AC_A	1	2921939	AC	A	0.982924	0.102367	0.00836666	6e-37	0.000847862	0.00294345	0.77
1:2979263_TG_T	1	2979263	TG	T	0.986621	0.0955087	0.00925659	2.7e-25	0.000775648	0.00326202	0.81
rs2788091	1	2983318	T	C	0.800847	0.0153832	0.00261071	1.3e-09	-0.00123022	0.000916127	0.18
rs75412307	1	2983674	T	G	0.979401	0.0633256	0.00740339	8.2e-19	0.000199135	0.00262136	0.94
rs2472826	1	2989826	G	A	0.971405	0.0446467	0.00630834	2.2e-13	-0.00219378	0.00223754	0.33
rs2993482	1	2991808	T	G	0.972777	0.0482191	0.00638144	7.1e-15	-0.00157057	0.00226506	0.49
rs111827838	1	2997409	C	T	0.9987	0.232009	0.0354971	3.2e-10	-0.00969484	0.012189	0.43
rs138440626	1	2998604	C	T	0.995264	0.109596	0.0156841	1.7e-12	0.00218938	0.00542507	0.69
rs535368124	1	3004111	G	C	0.995162	0.10301	0.0152357	6.5e-12	0.00263411	0.00527571	0.62
rs149710996	1	3006467	G	A	0.993573	0.0892914	0.0135448	3.3e-11	-0.00244285	0.00471782	0.6
rs145959765	1	3011553	T	C	0.994485	0.0929883	0.014483	1.5e-10	0.00137785	0.00514007	0.79
rs142251515	1	3019660	C	T	0.994185	0.0838805	0.014714	2.6e-09	-0.00551044	0.00512648	0.28
rs731024	1	6644723	G	A	0.668426	0.018568	0.00219758	4e-19	-0.00119351	0.000775084	0.12
rs6682920	1	6645867	G	A	0.668243	0.018601	0.00219658	3.5e-19	-0.00121544	0.000774786	0.12
1:6650475_CTT_C	1	6650475	CTT	C	0.885435	0.0189037	0.00327986	3.9e-09	-0.00111498	0.00115296	0.33
1:6651450_CA_C	1	6651450	CA	C	0.639396	-0.0135561	0.00215613	1.6e-11	0.0012042	0.000760053	0.11
rs1556036	1	6651728	C	T	0.672447	-0.0129516	0.00221156	2e-10	0.00110066	0.000779465	0.16
rs2235567	1	6652718	G	A	0.639956	-0.0132505	0.00215447	4e-11	0.00113437	0.000759452	0.14
rs7513688	1	6652745	G	A	0.639891	-0.0131769	0.00215491	4.9e-11	0.00114272	0.000759628	0.13
rs2235566	1	6655053	G	A	0.668805	0.0188197	0.00219558	1.6e-19	-0.00112988	0.000774378	0.14
rs7521134	1	6657240	C	T	0.660547	-0.0135938	0.00218306	3.7e-11	0.000981892	0.000769358	0.2
rs4587589	1	6657355	C	T	0.660664	-0.0135633	0.00218328	4.1e-11	0.00100735	0.000769416	0.19
rs3866805	1	6657424	C	A	0.644178	-0.0132485	0.00215961	6e-11	0.000936117	0.000761298	0.22
rs35070405	1	6657964	T	C	0.643384	-0.0134224	0.00215804	4e-11	0.000993956	0.000760751	0.19
rs2232460	1	6659505	G	A	0.665536	0.0191025	0.00218705	3.2e-20	-0.000979233	0.000771254	0.2
rs12124126	1	6660349	A	G	0.665703	0.0192602	0.00218807	1.9e-20	-0.00102738	0.000771557	0.18
rs12028517	1	6661732	C	A	0.665802	0.0192298	0.00218876	2.2e-20	-0.00103032	0.000771786	0.18
rs6674407	1	6662913	G	A	0.665656	0.0192508	0.00218849	2e-20	-0.0010241	0.000771707	0.18
rs78728410	1	6663031	G	C	0.665496	0.019235	0.00218825	2e-20	-0.00102517	0.000771685	0.18
rs2232453	1	6663554	C	T	0.662606	-0.0144417	0.00218422	3e-12	0.000854951	0.000770076	0.27
rs11122103	1	6669319	C	T	0.662725	-0.0144356	0.00218444	3e-12	0.000829114	0.000770169	0.28
rs12741141	1	6669970	C	G	0.644097	-0.0139803	0.00215777	6.9e-12	0.000740534	0.000760995	0.33
rs11582660	1	6670699	A	G	0.645998	-0.0139807	0.00216046	6.3e-12	0.000775304	0.000761944	0.31
rs11583755	1	6672729	A	C	0.644359	-0.0139251	0.00215787	7.2e-12	0.000710296	0.000761003	0.35
1:6673261_CAGCGGGG_C	1	6673261	CAGCGGGG	C	0.662723	-0.0144317	0.00218912	3.2e-12	0.000820175	0.000771861	0.29
rs12402498	1	6673780	C	G	0.663485	-0.0142742	0.00218539	4.8e-12	0.000756775	0.000770561	0.33
rs12725767	1	6676040	A	G	0.646066	-0.014003	0.00215879	5.3e-12	0.00069817	0.000761448	0.36
rs35649025	1	6676191	C	T	0.66293	-0.0144115	0.00218374	3e-12	0.00073259	0.000770028	0.34
rs12731208	1	6676485	T	G	0.646395	-0.0140362	0.00215902	4.2e-12	0.000686054	0.000761522	0.37
rs10779795	1	6677064	A	G	0.6621	0.0193547	0.00218365	1.4e-20	-0.000920672	0.00077007	0.23
rs67436983	1	6678726	C	T	0.663258	-0.0143893	0.00218409	3.3e-12	0.000781787	0.000770086	0.31
rs9661802	1	6678864	A	C	0.661989	0.019304	0.0021838	1.9e-20	-0.000915462	0.00077012	0.23
rs35690436	1	6679456	G	C	0.663013	-0.0143757	0.00218351	3.2e-12	0.000734269	0.000769996	0.34
rs2072948	1	6679848	C	T	0.66322	-0.0143769	0.00218397	3.3e-12	0.000771868	0.000770104	0.32
rs11122105	1	6680907	G	A	0.661594	0.019364	0.00218549	1.4e-20	-0.000966562	0.000770656	0.21
rs11122106	1	6681262	A	G	0.668065	0.0196371	0.00221165	9.2e-21	-0.000865486	0.000779787	0.27
rs12034227	1	6681275	A	C	0.662037	0.0193666	0.00218405	1.4e-20	-0.000925171	0.000770195	0.23
rs6695474	1	6681375	C	T	0.66305	-0.0144119	0.00218413	2.9e-12	0.000750402	0.000770196	0.33
rs14057	1	6683240	G	A	0.643464	0.0191675	0.00215839	2.3e-20	-0.000821253	0.000760815	0.28
rs2076363	1	6684906	C	G	0.663183	-0.0146784	0.00218623	1.2e-12	0.000728223	0.000771371	0.35
1:6685666_CCG_C	1	6685666	CCG	C	0.666021	-0.0151603	0.0021927	3.6e-13	0.000731232	0.000773709	0.34
rs12127191	1	6685774	C	T	0.649969	0.0191745	0.00216485	1.8e-20	-0.00112441	0.000763008	0.14
rs10864629	1	6686214	A	T	0.65103	0.0191953	0.00216748	2.2e-20	-0.00110435	0.000763989	0.15
rs11122109	1	6688358	G	A	0.666611	-0.0150953	0.00219026	4.8e-13	0.000768912	0.000772844	0.32
rs1556034	1	6689319	G	A	0.650204	0.0191916	0.00216417	2.1e-20	-0.00113781	0.000762763	0.14
rs12079872	1	6689824	A	G	0.648708	0.0192478	0.00216245	1.4e-20	-0.00106798	0.00076212	0.16
1:6691238_ATT_A	1	6691238	ATT	A	0.723295	0.0175737	0.00269013	3e-11	-0.000647131	0.000946447	0.49
rs12405970	1	6691312	G	A	0.666378	-0.015187	0.00218982	3.3e-13	0.000746587	0.000772664	0.33
rs3174820	1	6693097	A	G	0.649374	0.0192988	0.00216288	1.2e-20	-0.00121107	0.000762279	0.11
rs3830771	1	6693641	C	CATT	0.650162	0.0194123	0.00216908	9.1e-21	-0.00116921	0.000764423	0.13
rs11583890	1	6693876	A	G	0.666415	-0.0151968	0.00219007	3e-13	0.000795906	0.000772741	0.3
rs12727844	1	6694207	A	G	0.649633	0.0192026	0.002163	1.8e-20	-0.00121313	0.000762315	0.11
rs6804	1	6694574	G	A	0.649672	0.0191723	0.00216361	2.1e-20	-0.00120722	0.000762486	0.11
rs2294532	1	6694927	C	T	0.666746	-0.0151741	0.00219076	3.8e-13	0.000804839	0.000772997	0.3
rs11892	1	6695331	G	T	0.668001	0.0192086	0.00219273	3.6e-20	-0.00131015	0.000773164	0.09
rs732210	1	6696845	G	A	0.880382	0.0187293	0.00318479	3.1e-09	-0.000601442	0.00111881	0.59
rs746484754	1	6699273	AGTT	A	0.666357	-0.0151855	0.00219221	4.1e-13	0.000821842	0.000773488	0.29
rs776283242	1	6701534	TAGTA	T	0.651229	0.0190266	0.00216792	7e-20	-0.00125172	0.000764063	0.1
rs200448	1	6701978	T	C	0.432567	0.0164408	0.00208477	1.8e-16	-0.000830082	0.000734948	0.26
1:6703337_AT_A	1	6703337	AT	A	0.5749	0.017819	0.00215752	2.9e-17	-0.000589798	0.00076049	0.44
rs116412252	1	6703635	A	T	0.874111	0.0192493	0.00312832	5e-10	-0.0014338	0.00109913	0.19
rs2076365	1	6705571	C	G	0.654202	0.0191013	0.00217098	5.1e-20	-0.00128756	0.000765055	0.092
rs12137032	1	6708246	G	A	0.65418	0.0190951	0.00217097	5.2e-20	-0.00129665	0.000765048	0.09
rs12137106	1	6708459	G	A	0.654017	0.0190725	0.00217088	5.2e-20	-0.00130933	0.000765037	0.087
rs7549198	1	6709610	T	C	0.652962	0.0190813	0.002168	4.3e-20	-0.00132743	0.000763991	0.082
rs12759053	1	6709911	G	A	0.67711	-0.0161251	0.00220672	3.9e-14	0.00079787	0.00077845	0.31
rs12145525	1	6711146	T	C	0.653078	0.0192695	0.00217081	2.1e-20	-0.0013645	0.000765019	0.074
rs200441	1	6711941	C	T	0.432213	0.0163329	0.00208298	3.3e-16	-0.000827242	0.000734334	0.26
rs2294531	1	6711976	A	C	0.661401	-0.0157478	0.00219096	1e-13	0.000789799	0.00077286	0.31
rs2235564	1	6713114	C	T	0.658684	-0.0157356	0.00217694	7e-14	0.000728483	0.000767985	0.34
rs200440	1	6713282	A	G	0.432099	0.0163067	0.00208319	3.7e-16	-0.000838493	0.00073443	0.25
rs11122114	1	6714686	C	T	0.652793	0.0191362	0.00216846	3.7e-20	-0.00133118	0.000764134	0.081
1:6714854_TTTTG_T	1	6714854	TTTTG	T	0.672253	-0.0151132	0.00223279	1.9e-12	0.000713234	0.000787696	0.37
rs6577584	1	6715390	T	G	0.658671	-0.0157273	0.00217702	7.1e-14	0.000730907	0.000767993	0.34
rs6577585	1	6715440	G	A	0.658675	-0.0157215	0.00217704	7.4e-14	0.000730974	0.000767997	0.34
rs7551708	1	6715901	T	C	0.656019	-0.0154471	0.00217511	1.7e-13	0.000764527	0.000767215	0.32
rs6698073	1	6717672	C	T	0.658817	-0.0157624	0.0021773	6.6e-14	0.000723302	0.000768084	0.35
rs12755051	1	6718378	C	T	0.653037	0.0190588	0.00216925	4e-20	-0.00129879	0.000764399	0.089
rs35696356	1	6718701	C	CA	0.659445	0.0187577	0.00219752	3.2e-19	-0.00124498	0.000774266	0.11
rs5772247	1	6718712	G	GA	0.437532	0.0158999	0.00209514	1.9e-15	-0.000882752	0.000738575	0.23
rs6577586	1	6719008	G	A	0.661054	-0.0158988	0.00218348	4.1e-14	0.00058572	0.000770377	0.45
rs6577587	1	6719637	T	C	0.653677	-0.0156804	0.00216946	5.9e-14	0.000755683	0.000765252	0.32
rs12745724	1	6719679	G	A	0.6576	0.0192649	0.00217618	2e-20	-0.00136073	0.000766863	0.076
rs7519427	1	6719883	T	C	0.653696	-0.0156729	0.00216955	5.9e-14	0.000753729	0.000765288	0.32
rs7514505	1	6719976	C	T	0.653691	-0.0156747	0.00216948	5.9e-14	0.000752539	0.00076526	0.33
1:6720569_GATT_G	1	6720569	GATT	G	0.653971	-0.0155447	0.00217109	1.1e-13	0.000773296	0.000765823	0.31
rs2281190	1	6720990	C	A	0.654132	-0.0155566	0.00216993	9.3e-14	0.000738955	0.000765425	0.33
rs200451	1	6721234	T	A	0.436719	0.0161955	0.00208071	3.9e-16	-0.000845347	0.000733488	0.25
1:6721585_CTCT_C	1	6721585	CTCT	C	0.653473	-0.0155617	0.00217117	1e-13	0.000694194	0.000765838	0.36
1:6722194_TG_T	1	6722194	TG	T	0.774554	0.0177328	0.00305076	7.9e-11	-0.00109618	0.00107323	0.31
rs56212715	1	6722195	G	T	0.652437	-0.0153978	0.00217277	1.7e-13	0.000780919	0.000766396	0.31
rs2281189	1	6722559	T	C	0.653707	-0.0155489	0.00216996	8.7e-14	0.000748012	0.000765447	0.33
rs6671667	1	6722852	A	G	0.653675	-0.0156861	0.00216932	5.5e-14	0.000763662	0.000765196	0.32
rs6577588	1	6723082	T	C	0.683624	-0.0147875	0.00222281	7.2e-12	0.000839148	0.000784178	0.28
rs6577589	1	6723118	G	T	0.683613	-0.0147945	0.00222272	7e-12	0.000836819	0.000784159	0.29
rs149857	1	6723184	C	G	0.436749	0.016313	0.00208059	2.4e-16	-0.000867043	0.000733448	0.24
rs6659873	1	6723806	T	G	0.653692	-0.0156197	0.00216948	6.9e-14	0.000755541	0.000765251	0.32
rs2235563	1	6724105	T	C	0.653682	-0.0156078	0.00216946	7.3e-14	0.00075643	0.000765246	0.32
rs2039363	1	6724249	G	A	0.654175	-0.0155736	0.00217048	8.4e-14	0.00072858	0.000765612	0.34
rs2039364	1	6724457	A	G	0.653775	-0.0155739	0.00216973	8.3e-14	0.000732332	0.000765352	0.34
rs200450	1	6725230	C	G	0.425893	0.0156398	0.00209391	3.6e-15	-0.000817872	0.000738082	0.27
rs200449	1	6726401	G	A	0.438009	0.01628	0.00207961	2.4e-16	-0.000834863	0.000733082	0.25
rs779199581	1	6726449	T	TTC	0.734143	-0.0190629	0.00249358	2.7e-15	0.000502272	0.000879327	0.57
rs56869714	1	6726450	T	TC	0.681949	-0.0178078	0.00229221	2.2e-15	0.000576945	0.000807717	0.48
rs2294528	1	6729749	G	A	0.658067	0.0192255	0.00217863	2.6e-20	-0.00129308	0.000767742	0.092
rs3789573	1	6730905	T	C	0.657313	0.019144	0.00217621	3.4e-20	-0.00133025	0.00076685	0.083
rs201153	1	6731501	T	C	0.437848	0.016187	0.00208073	3.6e-16	-0.000822084	0.000733479	0.26
rs201151	1	6732424	G	A	0.437819	0.0162165	0.00208078	3.1e-16	-0.000825497	0.000733491	0.26
rs3789572	1	6732568	G	T	0.657465	0.0191193	0.00217674	3.6e-20	-0.0013196	0.000766986	0.085
rs35005772	1	6733081	C	T	0.653883	-0.0156207	0.0021705	7e-14	0.000677165	0.000765613	0.38
rs149856	1	6735264	A	C	0.437605	0.0162724	0.00208112	2.6e-16	-0.000823336	0.000733624	0.26
rs2294526	1	6735702	C	A	0.657176	0.0191802	0.00217667	3.2e-20	-0.00132893	0.000767009	0.083
rs189918	1	6737212	T	C	0.440632	0.0160673	0.00208631	6.3e-16	-0.000836399	0.000735426	0.26
rs12563715	1	6737235	C	A	0.412688	0.0156964	0.00212309	3.1e-15	-0.000784601	0.000748539	0.29
rs200446	1	6737870	G	A	0.43788	0.0162354	0.00208112	2.9e-16	-0.000825346	0.000733595	0.26
rs2039054	1	6738880	T	C	0.657348	0.0191663	0.00217688	3.2e-20	-0.00132528	0.000767066	0.084
rs12126058	1	6744709	C	T	0.679003	0.0181338	0.00221291	3.9e-18	-0.00136329	0.000779689	0.08
rs200445	1	6745139	T	C	0.459151	0.0146155	0.00207136	6.5e-14	-0.000807083	0.000729918	0.27
rs156991	1	6747449	C	A	0.459364	0.0145341	0.00207323	9.6e-14	-0.000794318	0.000730538	0.28
rs277686	1	6747897	C	G	0.650533	-0.0138793	0.00216586	1.5e-11	0.000681199	0.000763507	0.37
rs156989	1	6748129	G	A	0.459073	0.0146207	0.00207193	6.7e-14	-0.00080889	0.000730119	0.27
rs277685	1	6749761	A	G	0.650777	-0.0138919	0.0021661	1.6e-11	0.00069124	0.000763599	0.37
rs11804472	1	6749824	G	A	0.679048	0.0181041	0.00221456	4.5e-18	-0.00133688	0.000780281	0.087
rs156988	1	6749916	A	T	0.459135	0.0145763	0.0020723	8.6e-14	-0.000823164	0.00073025	0.26
rs277684	1	6750710	C	T	0.655678	-0.0141301	0.00217715	9.2e-12	0.00050801	0.000767541	0.51
rs156986	1	6753237	C	T	0.458936	0.0146794	0.00207259	5.8e-14	-0.000793503	0.000730352	0.28
rs3827729	1	6756434	G	A	0.681863	0.0181411	0.00222124	4.3e-18	-0.00101099	0.000782716	0.2
rs530516281	1	6757869	A	AT	0.471611	0.0147527	0.00209947	7.9e-14	-0.000862551	0.000739797	0.24
rs61780562	1	6758140	C	T	0.681816	0.0181558	0.00222135	4.1e-18	-0.00100625	0.000782772	0.2
1:6758686_TA_T	1	6758686	TA	T	0.441454	0.0148138	0.00208468	6e-14	-0.000794826	0.000734561	0.28
rs2943679	1	6758961	C	T	0.650899	-0.0140375	0.00216716	1e-11	0.000622897	0.000763954	0.41
rs34559878	1	6759095	G	A	0.681842	0.0181486	0.00222134	4.2e-18	-0.00100873	0.000782767	0.2
rs2019784	1	6759816	A	T	0.681757	0.0181428	0.00222173	4.3e-18	-0.00101719	0.000782876	0.19
rs12567649	1	6760197	T	C	0.68171	0.0181229	0.0022211	4.7e-18	-0.00100923	0.000782682	0.2
rs3761925	1	6761702	C	T	0.681836	0.0180314	0.00222145	6.7e-18	-0.000991787	0.000782814	0.21
rs278017	1	6763137	A	G	0.541473	-0.0146277	0.00207336	7.1e-14	0.000842064	0.000730623	0.25
rs600153	1	6763686	A	T	0.5415	-0.0146345	0.00207337	6.9e-14	0.000839995	0.00073063	0.25
rs278018	1	6763809	G	A	0.651259	-0.0140543	0.00216806	1e-11	0.0006722	0.00076427	0.38
rs278020	1	6764643	C	T	0.540447	-0.0144896	0.0020732	1.1e-13	0.000786508	0.00073051	0.28
rs278022	1	6764690	T	C	0.540265	-0.0144635	0.00207319	1.3e-13	0.000787026	0.000730504	0.28
rs11122118	1	6764807	T	C	0.682657	0.018075	0.00222363	5.5e-18	-0.0010175	0.000783525	0.19
rs278023	1	6765079	T	G	0.540134	-0.0145275	0.00207323	1e-13	0.000787589	0.000730566	0.28
1:6765536_AT_A	1	6765536	AT	A	0.683178	0.0183394	0.0022312	2.7e-18	-0.00106107	0.00078604	0.18
rs11122119	1	6768856	C	A	0.670509	0.0169216	0.00220143	6e-16	-0.000816552	0.000775728	0.29
rs277668	1	6770165	C	G	0.450799	0.0132277	0.00207484	1.5e-11	-0.000607865	0.00073114	0.41
rs277669	1	6770192	A	G	0.450686	0.0132234	0.00207459	1.5e-11	-0.000614999	0.000731047	0.4
rs277670	1	6771140	T	C	0.351954	0.013501	0.00216242	5.9e-11	-0.00052467	0.000762201	0.49
rs277672	1	6771607	G	T	0.448505	0.013196	0.00207533	1.5e-11	-0.000628179	0.00073138	0.39
rs277673	1	6772015	T	C	0.450644	0.0132094	0.00207384	1.6e-11	-0.000621304	0.000730781	0.4
rs277674	1	6772133	T	A	0.450647	0.0132033	0.00207373	1.6e-11	-0.000620006	0.000730743	0.4
rs11122120	1	6773199	C	T	0.667868	0.0172281	0.00219724	1.5e-16	-0.000888438	0.000774327	0.25
rs10864633	1	6773262	A	C	0.445306	0.0128697	0.00207545	4.5e-11	-0.000655987	0.000731402	0.37
rs34212062	1	6773330	C	CA	0.457682	0.0125387	0.0021066	2.1e-10	-0.000580368	0.000742174	0.43
rs626754	1	6774822	A	G	0.44525	0.0128823	0.00207529	4.4e-11	-0.000660279	0.000731347	0.37
rs35699710	1	6775115	A	AG	0.45021	0.0129799	0.00208157	2.8e-11	-0.000658463	0.000733566	0.37
rs12757616	1	6775370	A	G	0.445244	0.0128159	0.00207523	5.2e-11	-0.000651165	0.000731327	0.37
rs112233641	1	6775663	A	G	0.445232	0.0128101	0.00207501	5.4e-11	-0.00064781	0.000731253	0.38
rs60526467	1	6775886	A	G	0.757035	0.0184214	0.00241325	4.2e-15	-0.00206802	0.000850602	0.015
rs12133876	1	6775934	G	C	0.445264	0.0128007	0.00207514	5.3e-11	-0.000651677	0.000731291	0.37
rs12139891	1	6776081	T	C	0.445311	0.0127756	0.002075	5.8e-11	-0.000662141	0.000731256	0.37
rs34336537	1	6776228	G	A	0.445234	0.0127789	0.0020746	6e-11	-0.00064854	0.000731123	0.38
rs546126	1	6776772	C	T	0.445249	0.0127565	0.00207452	6.3e-11	-0.00065537	0.000731093	0.37
rs365650	1	6777168	G	A	0.445212	0.0127657	0.00207434	6.5e-11	-0.000635531	0.000731014	0.38
rs550806	1	6777273	A	G	0.346528	0.0130429	0.0021676	2.3e-10	-0.000564942	0.000764177	0.46
rs71568663	1	6777834	T	TG	0.443666	0.0129312	0.00207765	3.9e-11	-0.000642587	0.000732236	0.38
1:6777890_CA_C	1	6777890	CA	C	0.442339	0.0130109	0.00207686	2.5e-11	-0.000689471	0.000731989	0.35
rs34707270	1	6777896	A	C	0.486358	0.0127898	0.00212681	1.8e-10	-0.000632532	0.000749167	0.4
rs4908568	1	6777900	A	C	0.477036	0.0130347	0.00213303	8.3e-11	-0.000640537	0.000751318	0.39
rs7542428	1	6778639	A	G	0.44521	0.0127578	0.00207426	6.1e-11	-0.000643407	0.000731	0.38
rs7542520	1	6778705	A	T	0.445209	0.0127587	0.00207427	6.1e-11	-0.00064336	0.000731005	0.38
rs6687500	1	6779316	C	T	0.445199	0.0127506	0.00207443	6.4e-11	-0.000642537	0.000731061	0.38
rs6687593	1	6779372	C	T	0.445236	0.0127804	0.00207443	5.6e-11	-0.000638743	0.000731054	0.38
rs797012160	1	6780411	ATTT	A	0.443016	0.012917	0.00207687	3.7e-11	-0.000678443	0.000731953	0.35
rs10864634	1	6780648	G	A	0.445208	0.0128362	0.0020746	4.8e-11	-0.000648007	0.000731145	0.38
rs10864635	1	6780819	T	C	0.443003	0.0127983	0.00207587	5e-11	-0.000638578	0.000731659	0.38
rs277677	1	6781421	C	A	0.445206	0.0128621	0.00207467	4.4e-11	-0.00063178	0.000731173	0.39
rs277679	1	6783548	T	C	0.444976	0.0128266	0.00207481	5.2e-11	-0.000677893	0.000731219	0.35
rs202577	1	6784053	A	G	0.444747	0.0128506	0.00207497	5e-11	-0.000636529	0.000731282	0.38
rs277680	1	6784464	C	T	0.36287	0.0129215	0.00214669	1.6e-10	-0.000562491	0.000756767	0.46
1:6784515_GT_G	1	6784515	GT	G	0.441989	0.0129164	0.00208189	3.8e-11	-0.000828516	0.00073365	0.26
rs277683	1	6785557	A	G	0.440589	0.0130024	0.00207696	2.4e-11	-0.000698034	0.00073193	0.34
rs4390192	1	6785946	G	T	0.438063	0.0129624	0.00207804	2.5e-11	-0.00068826	0.000732353	0.35
rs4364905	1	6785947	C	T	0.438332	0.0128777	0.0020773	2.9e-11	-0.000683535	0.000732121	0.35
rs12568431	1	6786156	C	T	0.749294	0.018122	0.00238592	8.6e-15	-0.0020794	0.000840704	0.013
rs427123	1	6787275	G	A	0.445432	0.0130702	0.00208074	1.7e-11	-0.000622956	0.000733213	0.4
rs436920	1	6787396	G	C	0.348686	0.0134164	0.00217629	6.1e-11	-0.000418531	0.000767092	0.59
rs145817989	1	6787431	A	AAAC	0.346873	0.0135564	0.00218754	9.3e-11	-0.000583977	0.000770782	0.45
rs59553179	1	6787577	A	AT	0.441228	0.0127473	0.00209465	5.7e-11	-0.000686347	0.000738045	0.35
rs61780588	1	6788115	T	C	0.63298	0.0166446	0.00215804	2.8e-16	-0.000897267	0.000760388	0.24
1:6788877_CAT_C	1	6788877	CAT	C	0.593077	0.0136477	0.00215597	5.6e-12	-0.000793514	0.00075936	0.3
rs9699592	1	6788985	A	G	0.41625	0.013151	0.00210956	1.8e-11	-0.000759076	0.000743505	0.31
rs56851663	1	6788995	A	G	0.596463	0.0155452	0.00212453	1.3e-14	-0.000702213	0.000748663	0.35
rs567387472	1	6790510	T	TA	0.756133	0.0171549	0.00254975	5.4e-12	-0.00180119	0.000898496	0.045
rs11122122	1	6790946	A	G	0.378611	0.0127061	0.00214724	2.1e-10	-0.000721686	0.000757167	0.34
rs34164411	1	6791296	A	AAT	0.632168	0.0165382	0.00217704	7.5e-16	-0.00088779	0.000767003	0.25
rs11122123	1	6791386	T	A	0.63297	0.0166379	0.00216512	2.7e-16	-0.000994484	0.000762954	0.19
rs12121529	1	6792508	T	C	0.731499	0.0170708	0.00238676	1.1e-13	-0.00217467	0.000841195	0.0097
rs12146050	1	6792660	G	T	0.721455	0.0167392	0.00234511	1.3e-13	-0.00210777	0.000826428	0.011
rs10779796	1	6792724	T	C	0.618212	0.0154227	0.00216291	4.4e-14	-0.000930915	0.000762147	0.22
rs35904416	1	6793473	T	C	0.614951	0.0140922	0.00213933	5.1e-12	-0.000511095	0.000754034	0.5
rs11799611	1	6794311	A	G	0.716131	0.013344	0.00230666	4.9e-09	-0.00133173	0.000813342	0.1
rs112275608	1	6805865	CA	C	0.699137	0.0131789	0.00230596	3.2e-09	-0.00119154	0.000813603	0.14
rs299688	1	8352039	G	T	0.287277	0.0162786	0.00232431	3.2e-13	7.88967e-06	0.000820813	0.99
rs299689	1	8352398	T	C	0.270274	0.0161993	0.00236802	7.9e-13	0.000385801	0.000836622	0.64
rs299690	1	8352404	G	A	0.269907	0.0161403	0.002369	9.7e-13	0.000396612	0.000836858	0.64
rs299691	1	8352623	C	T	0.728209	0.0157178	0.00240272	1.8e-12	-0.00123673	0.000843643	0.14
rs299692	1	8352642	G	T	0.257811	0.0178938	0.00239158	1.1e-15	0.000269011	0.000845352	0.75
rs299693	1	8352656	G	A	0.257352	0.0178765	0.00239287	9.7e-16	0.000273202	0.000845702	0.75
rs71580018	1	8352736	T	TTTTTTC	0.27366	0.0176458	0.00241839	8.5e-15	0.000326315	0.000854086	0.7
rs299694	1	8352798	C	G	0.257048	0.0178624	0.00239206	1e-15	0.000276514	0.000845455	0.74
rs299695	1	8352853	C	T	0.257606	0.0178295	0.00239015	1.2e-15	0.000290529	0.000844912	0.73
rs757917575	1	8353065	AC	A	0.257821	0.0179659	0.00240733	1.2e-15	0.000266842	0.000850925	0.75
rs299696	1	8353465	C	G	0.257356	0.0180228	0.0023887	7.4e-16	0.000232861	0.000844397	0.78
rs299697	1	8353490	T	G	0.257406	0.0180513	0.0023883	5.6e-16	0.000294778	0.000844271	0.73
rs299698	1	8355752	T	C	0.731556	0.0155741	0.00240321	2.2e-12	-0.00115429	0.00084394	0.17
rs299699	1	8356170	G	T	0.731641	0.0155876	0.00240265	2.1e-12	-0.00118868	0.000843771	0.16
rs11121152	1	8357221	C	T	0.262469	0.0174145	0.00234612	1.6e-15	-5.2133e-05	0.000829568	0.95
rs116305284	1	8359110	T	C	0.79512	0.0164051	0.00283573	3.5e-10	-0.000558381	0.000995967	0.58
rs2120459	1	8360487	A	G	0.292348	0.0159048	0.00227398	1.1e-13	-5.22891e-05	0.000803929	0.95
rs1472878	1	8360494	A	G	0.292228	0.0159175	0.00227385	1e-13	-5.20495e-05	0.00080389	0.95
rs12027657	1	8361312	A	T	0.291901	0.0157717	0.00227266	1.8e-13	-3.30647e-05	0.000803463	0.97
rs12038182	1	8361368	C	T	0.292138	0.0156693	0.00227349	2.3e-13	-1.53699e-05	0.000803844	0.98
rs35288526	1	8361620	T	C	0.291973	0.015742	0.00227155	1.9e-13	-2.12327e-05	0.000803071	0.98
rs11121153	1	8362460	G	A	0.287889	0.0158303	0.00227975	1.3e-13	5.57837e-05	0.000806094	0.94
rs4908748	1	8362754	T	C	0.287806	0.0157869	0.00227835	1.6e-13	0.0255265	0.0229967	0.27
rs537439539	1	8363108	C	CTTTTTTTTA	0.288802	0.0159233	0.00228154	8.5e-14	-1.27142e-05	0.000806742	0.99
rs12122933	1	8363795	G	A	0.287657	0.0158061	0.00228308	1.6e-13	8.5366e-05	0.000807272	0.92
rs7537923	1	8364393	A	G	0.28695	0.0158033	0.00228804	1.8e-13	0.00014544	0.000808915	0.86
rs11121154	1	8364567	T	C	0.286843	0.0158726	0.002289	1.7e-13	0.000158042	0.000809238	0.85
rs12727604	1	8365102	G	A	0.286875	0.0159023	0.00228994	1.6e-13	0.000152848	0.000809542	0.85
rs12728882	1	8365177	C	T	0.28705	0.0158398	0.00228969	1.9e-13	0.000155195	0.000809484	0.85
rs12121507	1	8365479	A	G	0.286852	0.0159028	0.00229077	1.6e-13	0.000146678	0.000809835	0.86
rs10864345	1	8366090	A	T	0.286764	0.0159369	0.00229229	1.5e-13	0.000151643	0.000810382	0.85
rs12758680	1	8366429	T	C	0.673771	0.0174606	0.00226038	2.2e-17	-0.000381724	0.000795103	0.63
rs202099212	1	8367014	TG	T	0.271425	0.016507	0.00246736	1.1e-12	-7.47606e-05	0.000872227	0.93
rs11121157	1	8370088	G	A	0.653883	0.0199481	0.00221649	1.3e-22	-0.00145463	0.000779708	0.062
rs10864347	1	8371171	G	A	0.352603	0.0151539	0.0021948	8e-13	0.000570111	0.000774437	0.46
rs11121159	1	8371186	T	C	0.352775	0.0145348	0.00217596	4.6e-12	0.000695631	0.000767959	0.37
rs79804582	1	8372445	G	C	0.908103	0.0203347	0.00365055	2.1e-09	-0.000769083	0.00128292	0.55
rs1107284	1	8372536	C	T	0.353658	0.0145265	0.00217267	5e-12	0.000597189	0.000766772	0.44
rs966134	1	8373208	A	G	0.3534	0.0146087	0.00217149	3.5e-12	0.000580624	0.000766367	0.45
rs149807657	1	8373327	C	CGT	0.852547	-0.0165889	0.00296649	3.8e-10	-0.000944658	0.0010473	0.37
rs6694282	1	8374187	G	A	0.858864	-0.0155124	0.00297903	6.5e-09	-0.000615208	0.00105261	0.56
rs1466655	1	8375842	C	T	0.421449	0.017345	0.00209364	6e-18	0.000473058	0.000738221	0.52
rs1466654	1	8375913	G	T	0.420741	0.0173747	0.00209389	4.3e-18	0.000487684	0.000738326	0.51
rs142570272	1	8376358	A	AC	0.931712	0.025004	0.0042522	1.2e-09	-0.000816018	0.0014883	0.58
rs1467013	1	8377828	G	A	0.421349	0.0173004	0.00209106	5.2e-18	0.000471424	0.000737338	0.52
rs72635792	1	8378599	C	G	0.579524	-0.0172611	0.00209046	5.8e-18	-0.000481405	0.000737111	0.51
rs11121161	1	8379309	T	C	0.421121	0.0173727	0.00208867	3.4e-18	0.000430194	0.000736497	0.56
rs11121162	1	8379448	G	A	0.421421	0.0173121	0.00208793	5.2e-18	0.000429314	0.000736208	0.56
rs10779701	1	8379626	G	A	0.421366	0.0173492	0.00208832	4.1e-18	0.000424693	0.000736364	0.56
rs55985071	1	8379967	G	A	0.794199	-0.0172281	0.00255923	2.9e-13	-0.000493351	0.000904148	0.59
rs55819363	1	8380123	A	G	0.79431	-0.0172573	0.00255941	2.6e-13	-0.00048222	0.000904204	0.59
rs12404734	1	8380793	A	T	0.421635	0.0174327	0.00209008	2.7e-18	0.00049689	0.000736913	0.5
rs12408399	1	8380794	C	T	0.421689	0.0174195	0.00209015	2.9e-18	0.000493418	0.000736938	0.5
rs4908750	1	8380971	A	G	0.205943	0.0173746	0.0025587	1.9e-13	0.000436434	0.000904029	0.63
rs11583580	1	8381159	G	A	0.794294	-0.0173258	0.00255984	2.2e-13	-0.000473214	0.000904343	0.6
rs11121164	1	8381276	T	G	0.421212	0.0173787	0.00208929	4e-18	0.000434399	0.000736707	0.56
rs76546460	1	8381412	G	C	0.79429	-0.0173306	0.0025599	2.2e-13	-0.000476179	0.00090436	0.6
rs138411579	1	8381453	T	TAAAACCCATCTCTTAGCAA	0.421886	0.0173855	0.00209105	3.9e-18	0.00041234	0.000737268	0.58
rs61785830	1	8382403	C	G	0.312661	0.0196851	0.00240354	2.3e-19	0.000111855	0.000847884	0.9
rs12128682	1	8382404	A	G	0.312618	0.0196745	0.00240338	2.3e-19	0.000110938	0.000847833	0.9
rs12132135	1	8382607	G	A	0.205957	0.0173897	0.0025594	2.1e-13	0.000422994	0.000904223	0.64
rs7517675	1	8382681	A	G	0.421185	0.0173712	0.00208982	4.2e-18	0.000419309	0.000736891	0.57
rs1844583	1	8383469	T	A	0.375481	0.021383	0.00213416	9.5e-27	-0.000104366	0.000753115	0.89
rs151295180	1	8383676	A	ATTACT	0.411245	0.0194721	0.0021127	2.5e-23	-0.000203364	0.000744985	0.78
rs11585805	1	8383778	C	G	0.795525	-0.0173595	0.00256685	2.1e-13	-0.000468191	0.000906306	0.61
rs72635796	1	8383987	G	C	0.830923	-0.0155072	0.00276374	3.5e-09	0.00060873	0.000978527	0.53
rs72635798	1	8385004	G	A	0.83115	-0.0157111	0.00276594	2.5e-09	0.000642744	0.000979267	0.51
rs2292242	1	8385059	C	T	0.375606	0.0215314	0.00213484	5.3e-27	-9.98341e-05	0.000753337	0.89
rs9645401	1	8386658	A	G	0.794355	-0.017752	0.00256246	8e-14	-0.000358003	0.000905145	0.69
rs9628987	1	8386730	A	C	0.830837	-0.0156305	0.00276313	2.8e-09	0.000602752	0.000978256	0.54
rs11584036	1	8387463	G	A	0.795015	-0.0178052	0.00256667	7.7e-14	-0.000343472	0.000906762	0.7
rs11584095	1	8387779	G	A	0.830718	-0.0156473	0.00276313	2.6e-09	0.000656002	0.00097832	0.5
rs11584485	1	8387962	G	A	0.830884	-0.0156309	0.00276351	2.8e-09	0.000623889	0.000978397	0.52
rs12141444	1	8389153	C	T	0.888668	0.0196022	0.00333582	2.6e-10	-0.00110271	0.0011713	0.35
rs80046868	1	8389154	G	A	0.731743	-0.0135885	0.00234031	1.7e-10	0.000151025	0.000825687	0.85
rs72635800	1	8389715	G	A	0.831446	-0.0153318	0.00276306	5.3e-09	0.000663992	0.000978074	0.5
rs10449318	1	8389894	C	T	0.729782	-0.0138162	0.00233238	9.2e-11	0.000152479	0.000823338	0.85
rs1473497	1	8390008	A	G	0.270477	0.0139204	0.00233239	8.2e-11	-0.000157626	0.000823349	0.85
rs1473496	1	8390051	G	A	0.450983	0.0195243	0.00208182	6.1e-24	-0.000313451	0.000733522	0.67
rs12142465	1	8390054	C	A	0.731786	-0.0138883	0.00233756	7.5e-11	0.000197953	0.000824805	0.81
rs12565834	1	8390246	T	C	0.729585	-0.0135124	0.00233142	1.8e-10	1.06034e-05	0.000823019	0.99
rs12143547	1	8391251	C	T	0.730867	-0.0127955	0.00233147	2e-09	0.000117936	0.000823025	0.89
rs4908751	1	8392592	G	A	0.687848	0.0237206	0.00223511	1.2e-30	-0.00121766	0.000785343	0.12
rs10864349	1	8392610	T	C	0.185873	0.016166	0.00266496	3.8e-10	-0.00081225	0.000943095	0.39
rs35167234	1	8393871	C	T	0.721772	0.0241275	0.00231182	8.6e-30	-0.0016186	0.000812498	0.046
rs11121167	1	8394397	A	G	0.455936	0.0121845	0.00208057	9.2e-10	-0.001592	0.000732822	0.03
rs4908753	1	8394816	T	C	0.837705	0.0193225	0.00279689	4.2e-13	-0.00160712	0.000985436	0.1
rs66504733	1	8395122	C	T	0.447588	0.0123201	0.00208016	9.2e-10	-0.00155987	0.000732813	0.033
rs2305016	1	8395441	T	C	0.447089	0.0122854	0.0020799	1e-09	-0.00153316	0.00073278	0.036
rs7535752	1	8395560	G	T	0.819081	-0.0178464	0.0026793	2.7e-11	0.000522593	0.000947377	0.58
rs7537649	1	8398815	T	C	0.420078	0.0137822	0.00210598	2.3e-11	-0.00120025	0.000742142	0.11
rs12402088	1	8401588	C	T	0.437563	0.012281	0.0020923	2.2e-09	-0.00122538	0.000737182	0.096
rs111915429	1	8402221	C	T	0.832487	-0.0196805	0.00277913	4.2e-12	0.000105859	0.000982871	0.91
rs72636907	1	8403155	C	T	0.871008	0.0191759	0.00310868	5.7e-12	-0.00152185	0.00108925	0.16
rs1055236	1	8404093	C	T	0.698708	0.024675	0.00226736	1e-31	-0.00110125	0.000797108	0.17
rs13376065	1	8405662	G	A	0.835104	-0.0193498	0.00279975	1e-11	-4.66168e-05	0.00099061	0.96
rs10399665	1	8407287	C	T	0.450246	0.018525	0.00208798	1e-20	-0.000134569	0.000735551	0.85
rs11588961	1	8407458	G	A	0.7247	0.0249193	0.0023286	2.2e-30	-0.00140849	0.000818606	0.085
rs2895933	1	8409139	C	T	0.601309	-0.0133947	0.00213137	6.7e-11	0.00116591	0.000751491	0.12
rs10864351	1	8409672	C	A	0.500292	-0.0131205	0.00207503	5.2e-13	-7.71732e-05	0.000730776	0.92
1:8411211_AT_A	1	8411211	AT	A	0.705055	0.0287586	0.0022812	1.4e-41	-0.000959258	0.000801072	0.23
rs8627	1	8412935	C	T	0.528653	-0.0145639	0.00207252	1.1e-14	0.000655702	0.000729925	0.37
rs1064826	1	8412989	A	G	0.29726	-0.0290464	0.00226899	4.4e-43	0.000974539	0.000796851	0.22
rs1058791	1	8413317	A	C	0.828996	-0.0221006	0.00275945	3.2e-16	0.000259972	0.000977747	0.79
rs1058790	1	8413839	A	G	0.830592	-0.0231463	0.00276905	1.1e-17	0.000315865	0.000981214	0.75
1:8414685_AT_A	1	8414685	AT	A	0.83236	-0.0232085	0.00279463	1.5e-17	0.000220356	0.000990296	0.82
rs1889854	1	8415235	C	T	0.777683	-0.018229	0.00249434	1.3e-15	-0.000626898	0.000880562	0.48
rs1889853	1	8415290	C	A	0.776685	-0.0183884	0.00248927	7.3e-16	-0.00066459	0.000878824	0.45
rs2289733	1	8415418	G	A	0.809506	-0.0204199	0.00264149	3.1e-15	0.00018883	0.000934296	0.84
rs11121171	1	8416957	G	C	0.831447	-0.0226662	0.00277037	4.7e-17	0.000218234	0.000981212	0.82
rs11121172	1	8418644	C	A	0.3396	-0.0281206	0.00218902	1.7e-42	0.000253856	0.000768898	0.74
rs1058766	1	8418650	T	C	0.33913	-0.0281742	0.00218926	1.5e-42	0.000281102	0.000768958	0.71
rs7525559	1	8419629	T	C	0.544312	-0.0174893	0.00209328	7.1e-18	0.000814876	0.000738148	0.27
rs11581418	1	8419766	C	T	0.865089	-0.0222936	0.00306565	1.4e-13	-0.000689991	0.00108678	0.53
rs2784735	1	8421092	C	T	0.539785	-0.011671	0.00208628	3.8e-10	0.00113391	0.000734528	0.12
rs13596	1	8421203	T	C	0.353941	-0.0294514	0.00215773	1.9e-47	0.000722322	0.000757724	0.34
rs2252865	1	8422676	T	C	0.353502	-0.0295068	0.00215704	1.1e-47	0.000736477	0.000757524	0.33
rs10779702	1	8423510	A	G	0.356065	-0.0297482	0.00215426	8.9e-49	0.000706698	0.000756582	0.35
rs2289732	1	8423877	G	C	0.826195	-0.0208763	0.00272763	1e-14	0.00037589	0.000965622	0.7
rs9628991	1	8424039	C	G	0.825764	-0.0209552	0.00272617	6.9e-15	0.000327173	0.000965258	0.73
1:8424984_GA_G	1	8424984	GA	G	0.356068	-0.0297679	0.00215572	9.8e-49	0.000743027	0.000757157	0.33
rs3765972	1	8425798	C	T	0.828882	-0.0215588	0.00274499	1.1e-15	0.000366623	0.000972114	0.71
rs3753275	1	8425900	T	C	0.825873	-0.0209256	0.0027263	7.3e-15	0.00036291	0.000965299	0.71
rs6684863	1	8426236	G	A	0.828228	-0.0217025	0.00274129	6.7e-16	0.000355151	0.000970749	0.71
rs880320	1	8427002	C	A	0.345405	-0.0306774	0.00217911	1.5e-50	0.000890537	0.00076557	0.24
rs10864352	1	8429899	G	C	0.51337	-0.0154391	0.00206221	2.1e-16	0.000437178	0.000726332	0.55
rs11580417	1	8430224	G	A	0.829224	-0.0215525	0.00274578	1.3e-15	0.000448743	0.000972109	0.64
rs12079653	1	8430594	C	A	0.829044	-0.0215629	0.00274471	1.2e-15	0.000436815	0.000971765	0.65
rs11121174	1	8431105	C	G	0.828381	-0.0217255	0.00274151	6.5e-16	0.000453474	0.000970904	0.64
rs3795310	1	8431607	C	T	0.549074	-0.0248791	0.00207483	5e-37	-0.00021311	0.000730872	0.77
rs894875	1	8432136	C	T	0.342051	-0.0307352	0.00217466	5.5e-51	0.000798853	0.00076402	0.3
rs771818074	1	8432648	TA	T	0.82911	-0.0217868	0.00274697	7.6e-16	0.000378976	0.000972518	0.7
rs902355	1	8433124	T	C	0.828296	-0.021976	0.00274036	3.5e-16	0.000378569	0.000970533	0.7
rs754346	1	8433747	T	C	0.513548	-0.0153969	0.00206148	2.4e-16	0.000410479	0.000726095	0.57
rs144524893	1	8434429	A	AT	0.829352	-0.0212881	0.00276271	6.4e-15	0.000179402	0.000977976	0.85
rs36085291	1	8435172	T	TC	0.341844	-0.0307521	0.00217676	1e-50	0.000772303	0.000764695	0.31
rs6678140	1	8436802	C	T	0.341921	-0.0308788	0.00217594	3.3e-51	0.000746021	0.000764348	0.33
rs11121176	1	8437032	T	C	0.829381	-0.0216809	0.00274619	1.1e-15	0.000374791	0.000972237	0.7
1:8437376_CT_C	1	8437376	CT	C	0.829058	-0.0219039	0.00274584	5.1e-16	0.000417491	0.000972337	0.67
rs2708633	1	8439625	C	A	0.342029	-0.0309086	0.00217588	2.8e-51	0.000746554	0.000764314	0.33
rs11583012	1	8440132	G	A	0.829645	-0.0216438	0.0027476	1.2e-15	0.000365163	0.000972697	0.71
rs780543686	1	8440400	CT	C	0.312353	-0.029438	0.00232905	3.1e-41	0.00083861	0.000818754	0.31
rs2636314	1	8440643	G	A	0.754176	-0.0185575	0.0023954	2.8e-17	-0.000757901	0.000845321	0.37
1:8443072_TA_T	1	8443072	TA	T	0.345832	-0.0299293	0.00218777	6.2e-48	0.000494146	0.000768668	0.52
rs56812469	1	8444230	T	C	0.828502	-0.0218132	0.00274101	5.6e-16	0.000355249	0.000970754	0.71
rs3765971	1	8445360	C	T	0.341665	-0.0309501	0.00217647	1.8e-51	0.000738475	0.000764563	0.33
rs11121177	1	8445946	G	A	0.826143	-0.0210639	0.00272595	5.5e-15	0.000356378	0.000965262	0.71
rs2587513	1	8447237	T	C	0.512496	-0.0153877	0.00206063	2.9e-16	0.000444167	0.000725783	0.54
rs2708630	1	8447404	C	T	0.339043	-0.0307748	0.00218024	1.8e-50	0.000729754	0.000765794	0.34
rs2120461	1	8447722	C	T	0.339155	-0.0307502	0.00218014	1.8e-50	0.000729281	0.000765794	0.34
rs3996169	1	8448377	C	CTT	0.343853	-0.0301238	0.00218699	2.9e-48	0.000678574	0.000768174	0.38
rs11121178	1	8448404	A	G	0.339306	-0.0306396	0.00218057	5.4e-50	0.000733894	0.000766004	0.34
1:8448812_AAT_A	1	8448812	AAT	A	0.339475	-0.0305831	0.0021804	9e-50	0.000776663	0.000765966	0.31
rs2708628	1	8450448	T	C	0.753666	-0.018555	0.00239366	3.2e-17	-0.000754589	0.000844784	0.37
rs35106965	1	8450707	A	AT	0.338812	-0.0307462	0.00218192	2.8e-50	0.000741787	0.000766504	0.33
rs72636929	1	8451643	C	A	0.907183	0.0233505	0.00358059	2e-11	-0.000602398	0.00125699	0.63
rs2661863	1	8452725	T	C	0.3388	-0.0307331	0.00218101	2.2e-50	0.000721557	0.000766029	0.35
rs2708629	1	8454792	T	C	0.512458	-0.0153532	0.00206173	3.5e-16	0.000443358	0.000726173	0.54
1:8455534_CA_C	1	8455534	CA	C	0.759824	-0.0198886	0.00256704	1.3e-14	-0.000724941	0.000906506	0.42
rs11121179	1	8455712	G	T	0.827657	-0.0211192	0.00273445	4.6e-15	0.000306337	0.00096788	0.75
rs1443929	1	8457623	G	T	0.827632	-0.0211771	0.00273427	3.9e-15	0.000327137	0.000967814	0.74
1:8457648_GA_G	1	8457648	GA	G	0.573675	-0.0270132	0.00211837	6.8e-41	-0.000402203	0.000746687	0.59
rs762220800	1	8460247	TCA	T	0.688151	0.0296342	0.00223664	7.1e-45	-0.00137951	0.000785259	0.079
rs139951538	1	8460279	C	CAT	0.570429	-0.022497	0.00229479	6.7e-24	0.000775899	0.000807888	0.34
rs1932527	1	8461061	C	G	0.339378	-0.0306552	0.00218378	7.9e-50	0.000704638	0.000767175	0.36
rs1932529	1	8461129	A	G	0.51905	-0.0153222	0.00207547	5.4e-16	0.000367407	0.000731049	0.62
rs35699835	1	8461330	G	GT	0.826691	-0.0209175	0.00273109	8.7e-15	0.000263705	0.000966882	0.79
rs55818451	1	8462000	A	G	0.826768	-0.0212848	0.00272974	3.2e-15	0.000317801	0.000966387	0.74
rs55823627	1	8462079	C	T	0.82683	-0.0212492	0.00273076	3.7e-15	0.000276054	0.000966574	0.78
rs2784737	1	8463176	T	C	0.338919	-0.0307747	0.00218106	1.7e-50	0.000722196	0.000766051	0.35
rs2708631	1	8463510	C	T	0.753776	-0.0185588	0.00239399	3e-17	-0.000768905	0.000844858	0.36
rs2708632	1	8464509	T	C	0.338954	-0.0307508	0.00218103	2.1e-50	0.000715265	0.000766045	0.35
rs2784738	1	8466217	G	A	0.7539	-0.0186152	0.00239461	2.5e-17	-0.000793457	0.000845078	0.35
rs301796	1	8466730	T	C	0.661151	0.0307964	0.00218115	1.4e-50	-0.000741911	0.000766091	0.33
rs1884353	1	8466745	G	A	0.512546	-0.0153261	0.00206186	3.6e-16	0.000453376	0.000726227	0.53
rs2748456	1	8466750	C	T	0.753656	-0.0185687	0.00239357	2.8e-17	-0.000757798	0.000844692	0.37
rs5772323	1	8466867	T	TA	0.172601	0.0210666	0.00273385	6.8e-15	-0.000328104	0.000967771	0.73
rs301795	1	8467353	G	A	0.661184	0.0307406	0.00218119	2.3e-50	-0.000756307	0.000766111	0.32
rs301793	1	8467534	T	C	0.173264	0.0213925	0.00272958	2e-15	-0.000329613	0.000966397	0.73
rs301792	1	8468278	A	G	0.661187	0.0307522	0.00218126	2e-50	-0.000734263	0.00076614	0.34
rs301791	1	8468372	A	T	0.661208	0.0307705	0.00218126	1.9e-50	-0.000739766	0.000766129	0.33
rs301790	1	8469284	G	C	0.661173	0.0307424	0.00218132	2.1e-50	-0.000725184	0.000766154	0.34
rs301789	1	8469337	A	G	0.661216	0.0307313	0.00218142	2.4e-50	-0.000735525	0.00076618	0.34
rs2661868	1	8469789	C	T	0.75363	-0.0185935	0.00239382	2.7e-17	-0.000727667	0.000844782	0.39
rs301788	1	8472164	C	T	0.174101	0.0213193	0.00272516	2.6e-15	-0.000344424	0.000964972	0.72
rs1763838	1	8473331	G	A	0.661913	0.0307862	0.00218533	2.1e-50	-0.000650163	0.000767596	0.4
rs1763839	1	8473336	G	A	0.661935	0.0307659	0.00218542	2.3e-50	-0.000652607	0.000767632	0.4
rs28638379	1	8473985	C	T	0.511689	-0.0151979	0.00206412	6.7e-16	0.000343885	0.000726999	0.64
rs159960	1	8476428	A	G	0.443066	0.0240571	0.0020881	6.1e-34	-0.000301514	0.000735781	0.68
rs301804	1	8476441	C	G	0.686795	0.0301181	0.00223862	6e-46	-0.00152943	0.000785947	0.052
rs2708625	1	8476455	T	C	0.754748	-0.0172645	0.00241128	8.3e-15	-0.000309236	0.000851016	0.72
rs301805	1	8481016	T	G	0.4177	0.0267027	0.00209469	5.2e-41	0.000297072	0.000738465	0.69
rs301806	1	8482078	C	T	0.419676	0.0269817	0.00209212	5.5e-42	0.000413561	0.00073747	0.57
rs72636935	1	8482297	T	C	0.923898	0.0257278	0.00389756	5.7e-11	-0.00082518	0.00136605	0.55
rs159961	1	8484228	C	T	0.659928	0.0307698	0.00218112	1.6e-50	-0.000711505	0.000766121	0.35
rs57310340	1	8484529	A	G	0.90512	0.0228714	0.00352035	1.4e-11	-0.000351505	0.00123627	0.78
rs301807	1	8484823	A	G	0.418311	0.0267232	0.00209353	2.7e-41	0.000347933	0.00073803	0.64
rs302714	1	8486131	A	C	0.660144	0.030883	0.00218158	8.2e-51	-0.000723629	0.000766216	0.34
rs301808	1	8486341	C	G	0.659915	0.0308678	0.00218149	7.6e-51	-0.000711836	0.000766221	0.35
rs545002548	1	8486509	CA	C	0.594256	0.0168108	0.00219074	1.8e-15	0.000824994	0.000770727	0.28
rs301797	1	8487323	C	A	0.659953	0.0308228	0.00218182	1.2e-50	-0.000724852	0.000766329	0.34
rs115846081	1	8487327	T	C	0.954911	0.0284623	0.00497449	2.3e-09	-0.00290331	0.00173261	0.094
rs301798	1	8488565	A	G	0.659967	0.0308507	0.00218242	8.6e-51	-0.000731977	0.000766551	0.34
rs301799	1	8489302	C	T	0.417275	0.0268823	0.00209504	9.9e-42	0.000439244	0.000738581	0.55
rs302719	1	8490320	T	G	0.659765	0.0309365	0.0021825	4.1e-51	-0.000746612	0.000766615	0.33
rs301800	1	8490603	T	C	0.175324	0.0215042	0.00271532	6.4e-16	-0.000264661	0.00096144	0.78
rs159962	1	8490983	C	T	0.660248	0.0308535	0.00218366	9e-51	-0.000635248	0.000766977	0.41
rs172531	1	8495590	A	G	0.659796	0.0309749	0.00218426	3.9e-51	-0.000686919	0.000767183	0.37
rs301801	1	8495945	T	C	0.659812	0.0310023	0.0021845	3.2e-51	-0.000695302	0.000767266	0.36
rs301802	1	8497307	T	A	0.417042	0.026728	0.00209801	4.3e-41	0.000408878	0.000739633	0.58
rs2784739	1	8497558	T	G	0.759141	-0.0180465	0.00241827	5e-16	-0.000698571	0.000853473	0.41
rs34976449	1	8498326	T	TG	0.415332	0.0266921	0.00210482	1.1e-40	0.000381787	0.000742013	0.61
rs301803	1	8498680	A	T	0.659805	0.0310628	0.00218602	2.6e-51	-0.000707918	0.000767796	0.36
rs35025831	1	8500791	C	CA	0.694237	0.0294678	0.00232796	1.6e-41	-0.000326197	0.000817486	0.69
rs2784740	1	8501057	T	A	0.75782	-0.0182182	0.00241964	2.5e-16	-0.000685991	0.000853834	0.42
rs301819	1	8501786	A	G	0.41266	0.0263049	0.0021055	1.9e-39	0.00043588	0.000742205	0.56
rs301818	1	8503242	G	A	0.657091	0.0306642	0.00218505	7.5e-50	-0.000596475	0.000767252	0.44
rs301817	1	8503379	C	A	0.413088	0.026304	0.00210544	1.8e-39	0.000458206	0.000742177	0.54
rs159963	1	8504421	C	A	0.417505	0.0265701	0.00210516	4.5e-40	0.000468187	0.000742049	0.53
rs301816	1	8505058	G	A	0.414892	0.0264344	0.00210884	1.5e-39	0.00033799	0.000743393	0.65
rs301815	1	8506774	A	G	0.102518	0.0210655	0.00345572	3.8e-10	-0.00018449	0.00122152	0.88
rs11581328	1	8507773	G	A	0.790018	-0.0177949	0.0025754	9.8e-14	-0.000447496	0.000908847	0.62
rs301814	1	8510577	T	C	0.366045	0.0245697	0.0021418	5.6e-33	0.000106962	0.000756276	0.89
rs301813	1	8510595	T	C	0.175301	0.0265797	0.00271788	1.3e-23	0.000388409	0.000963442	0.69
rs34495671	1	8511501	C	CA	0.366603	0.0244907	0.00214452	6.9e-33	0.000103688	0.000757192	0.89
rs533403757	1	8513868	C	CA	0.366076	0.0245076	0.00214348	7.3e-33	5.18328e-05	0.000756852	0.95
rs159959	1	8514796	T	C	0.175346	0.0266482	0.00271855	9.8e-24	0.000384174	0.000963676	0.69
rs55650673	1	8514844	G	A	0.926783	0.0261104	0.00396361	4.2e-11	-0.000407517	0.00138912	0.77
rs301812	1	8514897	C	A	0.175922	0.0266845	0.00271933	7.4e-24	0.000458225	0.000963933	0.63
rs301811	1	8515050	C	T	0.175442	0.0265422	0.00271939	1.6e-23	0.000343076	0.000964005	0.72
rs17464614	1	8516282	A	G	0.926696	0.0259852	0.00395954	4.8e-11	-0.00037237	0.00138774	0.79
rs301810	1	8516388	G	C	0.17512	0.0266611	0.00271994	1.1e-23	0.000373458	0.000964113	0.7
rs301809	1	8519070	C	T	0.174975	0.0267327	0.0027211	9.5e-24	0.000344295	0.000964482	0.72
rs301785	1	8524193	A	C	0.174985	0.0267837	0.00272127	8e-24	0.000451624	0.000964626	0.64
rs12080583	1	8524877	G	A	0.365501	0.0246088	0.00214178	4.1e-33	0.000148952	0.000756237	0.84
rs4908760	1	8526142	G	A	0.365077	0.02441	0.00214177	1.1e-32	0.000148619	0.000756221	0.84
rs17381420	1	8528020	A	G	0.925684	0.0259107	0.00393612	5.2e-11	-0.000313818	0.00137964	0.82
rs910581	1	8529524	T	C	0.364912	0.0244282	0.00214208	1.2e-32	0.000175953	0.000756339	0.82
rs141582190	1	8530497	A	G	0.907183	0.023724	0.00355843	3.5e-12	-0.000191662	0.00125004	0.88
rs7543004	1	8531111	A	G	0.364919	0.0244449	0.00214213	1.1e-32	0.000182171	0.000756355	0.81
rs1922983	1	8531326	A	G	0.365197	0.0245137	0.00214217	7.7e-33	0.000171499	0.00075636	0.82
rs12061328	1	8531963	C	T	0.365477	0.0245717	0.00214183	5.5e-33	0.000164445	0.000756258	0.83
rs6577488	1	8534529	T	C	0.36557	0.0245816	0.00214162	5.7e-33	0.000150392	0.000756197	0.84
rs2399145	1	8535087	G	A	0.17496	0.0266196	0.00272095	1.4e-23	0.000397774	0.000964463	0.68
rs4995074	1	8535164	T	G	0.619413	0.0262733	0.00212457	1.5e-39	-0.000681722	0.00074655	0.36
1:8535433_TA_T	1	8535433	TA	T	0.357646	0.0248036	0.00217444	9.2e-33	0.000111466	0.000767772	0.88
rs4351668	1	8535818	C	T	0.36553	0.0245344	0.00214173	8e-33	0.000136272	0.000756238	0.86
rs4463697	1	8535863	T	C	0.174853	0.0266599	0.00272161	1.4e-23	0.000443508	0.000964677	0.65
rs6577489	1	8536575	A	C	0.647819	0.0251058	0.00216014	2.4e-35	-0.00121388	0.000758718	0.11
rs1024197	1	8537058	C	G	0.364909	0.0243988	0.00214215	1.5e-32	0.000148715	0.000756372	0.84
rs1884352	1	8537289	G	A	0.379565	0.0248714	0.00212815	3.1e-34	7.05896e-05	0.000751165	0.93
rs2399144	1	8539269	C	A	0.175026	0.0267489	0.00272099	9.3e-24	0.000454193	0.000964495	0.64
rs7551849	1	8539463	A	G	0.365497	0.0245545	0.0021418	7.4e-33	0.000139275	0.000756271	0.85
rs200601993	1	8540188	GT	G	0.175	0.0270339	0.00272122	3.2e-24	0.00036915	0.000964572	0.7
rs150520468	1	8540191	T	G	0.62682	0.0201605	0.00240685	8.8e-19	-0.00071939	0.000846432	0.4
rs773606336	1	8540203	GT	G	0.175	0.0270339	0.00272122	3.2e-24	0.00036915	0.000964572	0.7
rs11121186	1	8540341	G	A	0.365134	0.024488	0.00214209	1e-32	0.000144278	0.000756348	0.85
1:8542279_TAA_T	1	8542279	TAA	T	0.364829	0.0244213	0.00214241	1.3e-32	0.00015703	0.000756469	0.84
rs12724979	1	8542700	G	C	0.364935	0.0243908	0.00214211	1.7e-32	0.000153022	0.000756357	0.84
rs910582	1	8543060	T	A	0.175051	0.0267203	0.00272073	1e-23	0.000463136	0.000964421	0.63
1:8545856_CTT_C	1	8545856	CTT	C	0.399638	0.0204511	0.00212829	7.3e-23	0.000444284	0.00075089	0.55
rs33956517	1	8546815	T	TAA	0.4382	0.0227879	0.00211349	4.1e-28	0.000765754	0.000745014	0.3
rs12046643	1	8547866	A	C	0.365538	0.0245132	0.00214176	9.6e-33	0.000141708	0.000756255	0.85
rs67959876	1	8548098	A	C	0.648233	0.0250591	0.00216099	4e-35	-0.00119748	0.000758946	0.11
rs12753546	1	8548509	T	C	0.78246	0.0227885	0.00251451	5e-22	-0.00158448	0.00088076	0.072
rs6674651	1	8548558	G	T	0.365333	0.0243997	0.0021419	1.7e-32	0.000150118	0.00075632	0.84
rs6577490	1	8549133	G	A	0.175068	0.0267249	0.00272076	1e-23	0.000470151	0.000964429	0.63
rs7521809	1	8549403	A	G	0.175039	0.0267017	0.00272101	1.1e-23	0.000471355	0.000964473	0.63
rs10864353	1	8549716	A	G	0.365556	0.024489	0.00214177	1.2e-32	0.000139318	0.000756257	0.85
rs10864354	1	8549741	C	T	0.364945	0.0243595	0.00214213	2.1e-32	0.000154306	0.000756363	0.84
rs11121188	1	8549971	G	A	0.64805	0.0249952	0.00216022	4.5e-35	-0.00116316	0.00075872	0.13
rs4908761	1	8552219	G	A	0.364981	0.0245313	0.00214228	7.9e-33	0.000158695	0.00075643	0.83
rs6677736	1	8552804	A	T	0.365668	0.0244979	0.00214179	1.1e-32	0.000135511	0.000756263	0.86
rs6677739	1	8552810	A	T	0.1752	0.0271317	0.00272112	2.2e-24	0.000429578	0.000964621	0.66
rs6701803	1	8554248	C	T	0.906901	0.0236517	0.00355403	3.7e-12	-0.000110424	0.00124863	0.93
rs4908501	1	8554471	T	G	0.648061	0.025074	0.00216057	2.9e-35	-0.00120458	0.000758805	0.11
rs7527389	1	8556545	A	G	0.365535	0.0244699	0.00214166	1.2e-32	0.000126845	0.000756234	0.87
rs7518608	1	8557320	C	G	0.365535	0.0244677	0.00214165	1.2e-32	0.000126989	0.000756231	0.87
rs7530745	1	8557691	A	C	0.364863	0.0243178	0.00214211	2.3e-32	0.000140925	0.000756367	0.85
rs57399447	1	8558765	A	T	0.622504	0.0262951	0.00213179	1.8e-39	-0.000714898	0.00074914	0.34
rs4908503	1	8558876	T	G	0.174719	0.0268318	0.00272261	8e-24	0.000379148	0.000964975	0.69
rs12759741	1	8559660	G	A	0.619515	0.0262617	0.00212449	1.4e-39	-0.000662991	0.000746501	0.37
rs12065127	1	8560646	T	C	0.365638	0.0246059	0.00214178	5e-33	0.00015212	0.000756299	0.84
rs35570980	1	8560932	G	A	0.441424	0.0230907	0.00210556	5e-31	3.3888e-06	0.000741701	1
rs4908762	1	8563663	C	T	0.175367	0.0270094	0.00271934	3.4e-24	0.000421169	0.000964065	0.66
rs6669503	1	8564301	C	G	0.365198	0.0244751	0.00214215	1e-32	0.00013766	0.000756391	0.86
rs10864355	1	8566300	T	C	0.174985	0.0267277	0.0027213	1.1e-23	0.000437344	0.000964529	0.65
rs114879706	1	8566866	T	G	0.954926	0.0301972	0.0050182	4.8e-10	-0.00292367	0.00174739	0.094
rs12735687	1	8567498	G	T	0.648073	0.0249471	0.00215995	6.1e-35	-0.0011803	0.000758637	0.12
rs10864356	1	8569871	A	T	0.365645	0.0243907	0.00214168	2.1e-32	0.000130451	0.000756247	0.86
rs11121194	1	8569906	C	T	0.365638	0.0243997	0.00214172	1.9e-32	0.000127422	0.00075626	0.87
rs7542312	1	8573471	G	C	0.365324	0.0242897	0.00214208	3.1e-32	0.000125237	0.000756362	0.87
rs7520617	1	8573717	C	T	0.365155	0.0243738	0.00214209	1.8e-32	0.000136719	0.000756376	0.86
rs6668508	1	8574118	C	T	0.3656	0.0243595	0.0021417	2.1e-32	0.000126711	0.000756248	0.87
rs6577491	1	8574972	G	T	0.36517	0.0243738	0.0021421	1.8e-32	0.000140529	0.000756377	0.85
rs6577492	1	8575064	C	A	0.36528	0.0243454	0.00214204	2.2e-32	0.000142477	0.000756326	0.85
rs6577494	1	8576925	C	T	0.365535	0.0244191	0.00214175	1.6e-32	0.000129356	0.000756278	0.86
rs2399143	1	8579449	A	G	0.175471	0.0268505	0.00271791	4.9e-24	0.000368785	0.000963275	0.7
rs6577496	1	8581227	C	A	0.365492	0.0244447	0.00214182	1.4e-32	0.000127139	0.000756301	0.87
rs71509050	1	8581253	G	A	0.378966	0.0233999	0.0021505	2.4e-30	0.000294937	0.000758991	0.7
rs77896876	1	8581256	C	G	0.378966	0.0233999	0.0021505	2.4e-30	0.000294981	0.000758991	0.7
rs147119889	1	8581257	T	A	0.380688	0.0228502	0.00213841	7.3e-29	3.41496e-05	0.000754838	0.96
rs150257084	1	8581258	C	A	0.380685	0.0228623	0.00213842	6.9e-29	3.74639e-05	0.000754837	0.96
rs58440383	1	8583723	C	A	0.365834	0.0245376	0.002143	7.8e-33	9.36627e-05	0.00075665	0.9
rs386628272	1	8583727	A	AAT	0.364989	0.0245036	0.00214258	8.7e-33	0.000131343	0.000756557	0.86
rs11121197	1	8586333	G	A	0.175744	0.0266983	0.00271639	8e-24	0.000430441	0.000962789	0.65
1:8586352_CT_C	1	8586352	CT	C	0.186134	0.0255283	0.00271598	1.1e-21	2.30499e-05	0.000963141	0.98
rs2297867	1	8586563	C	A	0.175933	0.0268604	0.00271568	4.4e-24	0.000401515	0.000962672	0.68
1:8589524_ATT_A	1	8589524	ATT	A	0.175168	0.0269809	0.0027209	3.6e-24	0.000402413	0.000964547	0.68
rs11121198	1	8590427	C	G	0.175189	0.026803	0.00272024	8.1e-24	0.000373131	0.000964252	0.7
rs12131864	1	8591162	A	G	0.365451	0.0245201	0.00214195	8.8e-33	0.000125254	0.000756337	0.87
rs61783642	1	8591397	T	C	0.365126	0.0244556	0.00214244	1.2e-32	0.000123287	0.000756491	0.87
rs7518744	1	8592943	T	C	0.175036	0.0265946	0.00272105	1.7e-23	0.000362746	0.000964425	0.71
rs7526121	1	8595894	T	C	0.175279	0.0268061	0.00271968	7e-24	0.000404148	0.000964027	0.68
rs10779703	1	8596182	C	T	0.175319	0.0268055	0.00271953	7.6e-24	0.000410745	0.000964021	0.67
rs1463051	1	8596893	T	A	0.365359	0.0243911	0.00214205	1.8e-32	0.000150169	0.000756365	0.84
rs1463050	1	8597042	G	A	0.365729	0.0244475	0.00214172	1.3e-32	0.000165968	0.000756261	0.83
rs1463049	1	8597108	A	T	0.365357	0.0243942	0.00214206	1.8e-32	0.00015084	0.000756366	0.84
1:8599461_CT_C	1	8599461	CT	C	0.364835	0.0245354	0.0021448	9.7e-33	0.000141357	0.000757328	0.85
rs11121199	1	8600192	G	A	0.365367	0.0243658	0.00214213	2e-32	0.000162922	0.000756379	0.83
rs12136689	1	8601118	A	C	0.64263	0.0250519	0.00215245	1.5e-35	-0.00116904	0.000756034	0.12
rs35865480	1	8603777	C	T	0.365704	0.0244792	0.00214158	1.2e-32	0.000179639	0.000756214	0.81
rs17386003	1	8604158	T	C	0.920049	0.0249157	0.0038058	7.2e-11	-0.000363084	0.00133299	0.79
rs6577497	1	8605667	A	T	0.614291	0.0261174	0.00211865	2.5e-39	-0.000645344	0.00074448	0.39
rs2399142	1	8606375	T	A	0.19575	0.0231657	0.00260879	6.5e-20	0.000677102	0.000924008	0.46
rs6702060	1	8607024	G	A	0.365723	0.024412	0.00214163	1.6e-32	0.000167093	0.000756233	0.83
rs926951	1	8608106	A	G	0.175303	0.026964	0.00271977	3.3e-24	0.000469945	0.000964035	0.63
rs6577498	1	8608824	C	A	0.175387	0.0268346	0.00271919	5.6e-24	0.000455405	0.000963821	0.64
rs6697997	1	8609111	A	G	0.175561	0.0271106	0.00271852	2e-24	0.000447498	0.00096377	0.64
rs4581300	1	8610505	T	G	0.162062	0.027131	0.00281214	7.7e-23	0.000608117	0.000995868	0.54
rs6577499	1	8612104	G	C	0.365626	0.0245522	0.002142	6.9e-33	0.00015676	0.000756367	0.84
rs2016084	1	8613418	C	A	0.365396	0.0243187	0.0021421	2.6e-32	0.000174162	0.000756388	0.82
rs6577500	1	8614571	G	C	0.175327	0.0268512	0.00271965	6.2e-24	0.000437448	0.00096407	0.65
rs6577501	1	8614926	T	C	0.366109	0.0243678	0.00214467	1.9e-32	0.000141509	0.000757336	0.85
rs6577502	1	8615577	T	C	0.365593	0.024481	0.00214186	9.9e-33	0.000180051	0.000756322	0.81
rs1473420	1	8616838	T	G	0.365556	0.0244541	0.00214193	1.1e-32	0.000181492	0.000756341	0.81
rs12756257	1	8616933	C	A	0.365415	0.024287	0.00214208	2.9e-32	0.000173664	0.000756383	0.82
rs9730025	1	8619073	A	G	0.174942	0.0268656	0.00272154	4.9e-24	0.000452449	0.000964617	0.64
rs6577503	1	8620453	A	G	0.956651	0.0324191	0.00512683	7.6e-11	-0.00317802	0.00178536	0.075
rs1463055	1	8621586	G	A	0.174967	0.0268571	0.00272142	4.9e-24	0.000445587	0.000964568	0.64
1:8622536_AGTTT_A	1	8622536	AGTTT	A	0.175439	0.0271111	0.00271987	2e-24	0.000372349	0.000964224	0.7
rs7530863	1	8622793	A	G	0.174956	0.0268549	0.00272157	5.4e-24	0.000444881	0.000964646	0.64
rs12048009	1	8624891	A	G	0.408739	0.0186297	0.00211244	6.8e-20	0.000633966	0.000744845	0.39
1:8626851_AT_A	1	8626851	AT	A	0.202928	0.0234069	0.00262874	3.4e-20	0.000718423	0.000931211	0.44
rs71641052	1	8628362	T	C	0.782672	0.0229513	0.00251309	3.2e-22	-0.00156416	0.000880176	0.076
rs1150395	1	8632599	C	T	0.0868211	0.0234967	0.00370077	8.4e-11	0.000754243	0.00131012	0.56
rs11121201	1	8632791	A	T	0.36556	0.0244001	0.00214243	1.6e-32	0.000145165	0.000756534	0.85
rs34524431	1	8633467	C	CT	0.365651	0.0245397	0.00214404	8.7e-33	0.000118632	0.000757095	0.88
rs201762119	1	8635620	ATT	A	0.377709	0.0136493	0.00225437	2.4e-10	-0.000395816	0.000795	0.62
rs7547411	1	8638145	A	G	0.361421	0.0248791	0.00214889	1.9e-33	6.53854e-05	0.000758891	0.93
1:8639316_CCT_C	1	8639316	CCT	C	0.61132	0.0264875	0.00212028	2.8e-40	-0.000658938	0.000745049	0.38
rs11121202	1	8639357	T	C	0.361915	0.024869	0.0021483	2.3e-33	5.03074e-05	0.000758712	0.95
rs1535158	1	8640892	T	C	0.169663	0.0267382	0.00275632	3.3e-23	0.000598791	0.000976933	0.54
rs1061039	1	8642588	T	C	0.361399	0.0248735	0.00214865	2e-33	6.78159e-05	0.00075881	0.93
rs6663123	1	8642931	T	C	0.361506	0.024852	0.00214868	2.4e-33	6.95607e-05	0.000758818	0.93
rs7537982	1	8644007	C	T	0.361466	0.0248323	0.00214866	2.7e-33	7.17674e-05	0.000758809	0.92
rs4908766	1	8645044	C	A	0.169803	0.0268728	0.00275582	2.2e-23	0.000590797	0.000976782	0.55
rs3082123	1	8645205	C	CAA	0.459709	0.0185764	0.00210471	1.2e-19	0.000225045	0.000741499	0.76
rs1934138	1	8645816	G	A	0.361903	0.0248861	0.00214809	2.3e-33	6.08837e-05	0.000758639	0.94
rs17386448	1	8646318	T	C	0.782833	0.0225831	0.00250704	8.7e-22	-0.00150559	0.000878443	0.087
1:8646860_GT_G	1	8646860	GT	G	0.170185	0.0269923	0.00275784	1.2e-23	0.00050188	0.000977616	0.61
rs6670508	1	8647917	G	C	0.362254	0.0248949	0.00214802	2e-33	4.55658e-05	0.000758586	0.95
rs6698079	1	8648041	C	T	0.170392	0.026671	0.00275166	4.1e-23	0.000548425	0.000975208	0.57
rs7526171	1	8650185	T	C	0.36241	0.024964	0.00214759	1.2e-33	4.83655e-05	0.000758419	0.95
rs6675443	1	8651582	T	A	0.362257	0.0250514	0.00214816	8.3e-34	6.63463e-05	0.00075862	0.93
rs6664111	1	8653484	T	A	0.362063	0.0248957	0.00214797	1.8e-33	4.71261e-05	0.000758541	0.95
rs922366	1	8653733	C	A	0.362246	0.0248146	0.00214776	3.1e-33	3.09464e-05	0.000758475	0.97
rs11121204	1	8654305	G	A	0.362233	0.0247878	0.00214779	3.6e-33	3.38713e-05	0.000758489	0.96
rs4908767	1	8654717	A	C	0.170513	0.0266826	0.00275066	3.8e-23	0.000526799	0.000974878	0.59
rs1463054	1	8655419	A	G	0.170487	0.0266718	0.00275069	3.9e-23	0.000512732	0.000974871	0.6
rs1809332	1	8656434	C	T	0.362123	0.0247958	0.00214778	3.4e-33	2.94045e-05	0.000758488	0.97
rs72639663	1	8656824	A	G	0.920673	0.0243397	0.00383331	2.3e-10	-0.000225351	0.00134203	0.87
rs34498274	1	8657149	A	AT	0.454575	0.0192606	0.00219093	9.5e-19	-1.99184e-05	0.000772307	0.98
rs4908504	1	8657199	C	T	0.170527	0.0266662	0.00275046	4.1e-23	0.00051624	0.000974813	0.6
1:8657844_AT_A	1	8657844	AT	A	0.165803	0.0275657	0.0028145	1.3e-23	0.000202861	0.000997764	0.84
rs11121205	1	8658085	G	A	0.362241	0.0247772	0.00214779	3.9e-33	2.47501e-05	0.000758498	0.97
rs6666191	1	8658442	C	T	0.362071	0.0248657	0.00214905	2e-33	1.57337e-05	0.000759002	0.98
rs6681362	1	8658527	T	G	0.362449	0.0249601	0.00214759	1.3e-33	3.23106e-05	0.000758439	0.97
rs1318218	1	8658712	T	C	0.362466	0.0249589	0.00214753	1.3e-33	3.02898e-05	0.000758419	0.97
rs2100888	1	8659282	T	A	0.362801	0.024583	0.00214842	1.2e-32	3.90852e-05	0.000758727	0.96
rs4480384	1	8659714	A	G	0.361785	0.0247609	0.00214821	5e-33	1.4306e-05	0.000758687	0.98
1:8660809_CTTTT_C	1	8660809	CTTTT	C	0.241458	0.0156569	0.00243684	6.4e-12	-0.000476607	0.000862124	0.58
rs2385706	1	8660840	A	G	0.170659	0.0271321	0.00275408	7.1e-24	0.000443334	0.000976189	0.65
rs376683409	1	8661795	AACACACACAC	A	0.376886	0.0208486	0.00213544	1.7e-24	-5.61299e-05	0.000753572	0.94
rs775458906	1	8662449	CA	C	0.348846	0.0249558	0.00219472	2.9e-32	5.58767e-05	0.000775329	0.94
rs72639666	1	8662690	G	C	0.921275	0.0241063	0.00384865	3.7e-10	-0.000346969	0.00134748	0.8
rs6688329	1	8663058	G	A	0.170924	0.0268097	0.00275052	2.4e-23	0.000450239	0.000974805	0.64
rs6679948	1	8663096	T	C	0.170466	0.0267622	0.00275054	2.7e-23	0.000489368	0.000974864	0.62
rs12136766	1	8663821	G	A	0.355665	0.0245293	0.00215658	5.9e-32	-0.000168186	0.000761775	0.83
rs1038008	1	8664922	T	C	0.170472	0.0267536	0.0027505	2.8e-23	0.000494693	0.00097485	0.61
rs577477257	1	8665904	C	CTTTT	0.329391	0.023655	0.00223573	5.8e-28	-0.000337754	0.0007897	0.67
rs552570752	1	8667784	C	CT	0.259621	0.0186879	0.00296373	4.2e-11	-0.00127608	0.00104881	0.22
rs3850467	1	8669170	A	G	0.170754	0.0268559	0.00274965	1.6e-23	0.000494129	0.000974619	0.61
rs6701331	1	8670206	A	C	0.355617	0.024412	0.00215666	1e-31	-0.000217365	0.000761808	0.78
rs3850466	1	8670466	A	G	0.169055	0.0267673	0.0027636	2.7e-23	0.00032819	0.000979376	0.74
rs2401133	1	8670993	T	C	0.167741	0.0267605	0.00277057	4.9e-23	0.000146522	0.000982059	0.88
rs3850465	1	8671779	G	C	0.16786	0.0266154	0.00276974	8.1e-23	0.000135952	0.000981765	0.89
rs114453190	1	8675291	C	A	0.955557	0.0296416	0.00503933	1.2e-09	-0.00273804	0.0017549	0.12
rs7532459	1	8677773	C	G	0.370666	0.0248124	0.00214631	1.9e-33	4.41208e-06	0.000757867	1
rs7544052	1	8677774	A	T	0.370707	0.0248157	0.00214632	1.9e-33	-2.25646e-06	0.000757872	1
rs1817367	1	8678784	C	T	0.171286	0.0266121	0.0027452	2.5e-23	0.000222523	0.000972885	0.82
rs1953827	1	8679848	G	A	0.359095	0.0241618	0.00215148	2.6e-31	-0.000192251	0.000759847	0.8
rs7513420	1	8681044	T	C	0.359375	0.0242313	0.00215099	1.8e-31	-0.000204045	0.000759695	0.79
rs6577505	1	8682545	T	A	0.329505	0.0199653	0.00239841	4.1e-18	0.000768684	0.00084655	0.36
1:8682838_AT_A	1	8682838	AT	A	0.17904	0.0265779	0.00275704	2.8e-23	0.000387196	0.000975501	0.69
rs6577506	1	8685037	A	C	0.17142	0.0264589	0.00274414	4.1e-23	0.000289326	0.000972559	0.77
rs1812457	1	8685520	C	T	0.171705	0.0265792	0.00274273	2.4e-23	0.000311762	0.000972194	0.75
rs11121209	1	8686862	G	A	0.359359	0.0242595	0.00215084	1.7e-31	-0.000206769	0.000759655	0.79
rs1381928	1	8690933	G	A	0.366273	0.02456	0.00214265	8.8e-33	-2.25399e-05	0.000756585	0.98
rs6674832	1	8691879	T	C	0.359287	0.0243033	0.00215102	1.2e-31	-0.00020325	0.000759694	0.79
rs2401137	1	8693324	T	A	0.360669	0.024477	0.00215045	3.9e-32	-0.000211918	0.000759414	0.78
rs10779704	1	8693537	A	C	0.374958	0.022454	0.00215502	4.5e-27	-0.000180193	0.000760866	0.81
rs6703577	1	8695522	C	A	0.171473	0.0265723	0.00274463	2.5e-23	0.000306711	0.000972761	0.75
rs1890572	1	8696006	T	C	0.366412	0.0247316	0.0021427	3.5e-33	-5.03398e-05	0.000756614	0.95
1:8696373_AT_A	1	8696373	AT	A	0.363214	0.0252454	0.00215317	2.8e-34	-0.000203911	0.0007603	0.79
rs7520025	1	8698277	C	T	0.366674	0.0245446	0.00214202	9.1e-33	-3.21802e-05	0.000756383	0.97
rs10864359	1	8698610	G	C	0.17141	0.0265917	0.00274501	2.5e-23	0.000302928	0.000972898	0.76
rs6577509	1	8699047	T	C	0.366626	0.0246322	0.00214211	5.1e-33	-2.93949e-05	0.000756412	0.97
rs6577510	1	8699079	A	G	0.171441	0.0265496	0.00274493	2.8e-23	0.000281265	0.000972849	0.77
rs10779705	1	8699682	G	A	0.171457	0.0265608	0.00274486	2.6e-23	0.000299987	0.000972845	0.76
rs5772329	1	8700215	G	GA	0.367328	0.0248555	0.00214421	1.7e-33	-8.41583e-06	0.000757137	0.99
rs1463052	1	8701231	A	G	0.35972	0.0242177	0.00215144	1.9e-31	-0.000193601	0.00075984	0.8
rs4908769	1	8701288	C	T	0.642033	0.0247612	0.00215354	8.5e-35	-0.001206	0.000756355	0.11
rs6577513	1	8702753	G	A	0.366336	0.0244942	0.00214296	1.2e-32	-7.28844e-05	0.000756699	0.92
rs2401138	1	8704059	G	C	0.35936	0.0240958	0.002152	3.6e-31	-0.000220037	0.000760006	0.77
rs1463053	1	8705037	G	A	0.35973	0.0242222	0.00215179	2e-31	-0.000218842	0.000759957	0.77
rs6690050	1	8707100	A	G	0.171187	0.0266811	0.00274743	1.9e-23	0.000217474	0.000973658	0.82
rs6692693	1	8707116	T	G	0.359351	0.0239969	0.0021524	6.1e-31	-0.000183668	0.000760159	0.81
rs6681316	1	8708340	C	G	0.171367	0.0265352	0.00274648	2.8e-23	0.000296882	0.000973428	0.76
rs11121210	1	8708529	T	C	0.359403	0.024062	0.0021523	4.3e-31	-0.000218791	0.000760107	0.77
rs59300030	1	8709030	T	TA	0.36683	0.0240162	0.00217116	2.5e-30	-0.000140991	0.000766361	0.85
1:8709361_TA_T	1	8709361	TA	T	0.170942	0.0267718	0.00275154	1.4e-23	0.000296283	0.000975224	0.76
rs2401139	1	8710836	A	G	0.171381	0.0266159	0.00274627	2.5e-23	0.000350309	0.000973306	0.72
rs35561280	1	8710954	C	CA	0.359564	0.0243254	0.00215257	1.1e-31	-0.000174883	0.000760182	0.82
rs6577514	1	8712743	T	G	0.376641	0.0222513	0.00213113	1.9e-27	7.53323e-05	0.000752401	0.92
rs6577515	1	8714202	G	C	0.377062	0.0223852	0.00213076	9.1e-28	7.42077e-05	0.000752291	0.92
rs6577516	1	8714342	G	A	0.377133	0.0223911	0.00213087	8.8e-28	8.17418e-05	0.000752347	0.91
1:8715659_CT_C	1	8715659	CT	C	0.95631	0.0293589	0.00508673	2.5e-09	-0.00248596	0.00177134	0.16
rs3737670	1	8716543	G	C	0.376181	0.0224149	0.00213109	8.6e-28	9.92954e-05	0.000752389	0.9
rs34709446	1	8721143	C	CAG	0.375956	0.0223321	0.00213313	1.2e-27	0.000113556	0.000753089	0.88
rs34430711	1	8721402	G	A	0.659652	0.0240354	0.00217802	2.4e-32	-0.000844799	0.000765165	0.27
rs4908771	1	8722507	A	G	0.188293	0.0225908	0.00264409	1.1e-18	0.00072828	0.000936097	0.44
rs10864360	1	8724522	C	T	0.383385	0.0229069	0.00212231	1.9e-29	0.00023239	0.00074914	0.76
rs11121212	1	8725993	C	T	0.383419	0.0228957	0.00212226	2e-29	0.000232926	0.000749129	0.76
rs10864361	1	8726721	T	C	0.375866	0.0222459	0.00213098	2.1e-27	9.88805e-05	0.00075234	0.9
rs4908505	1	8728864	G	A	0.376558	0.0225583	0.0021302	4.3e-28	7.81106e-05	0.000752115	0.92
rs4908506	1	8728978	A	C	0.376385	0.02252	0.00213058	5e-28	0.00011733	0.000752246	0.88
rs6695867	1	8730779	G	A	0.382979	0.0228192	0.00212256	3.3e-29	0.000271044	0.000749267	0.72
rs10864362	1	8732454	A	C	0.375969	0.0226242	0.00213164	3.4e-28	7.16238e-05	0.000752615	0.92
rs11121215	1	8733128	T	C	0.375184	0.0223974	0.00213246	1e-27	9.93282e-05	0.000752892	0.9
rs6577517	1	8735664	C	T	0.376386	0.0225647	0.00213044	4.5e-28	7.99563e-05	0.000752183	0.92
1:8737484_CA_C	1	8737484	CA	C	0.355935	0.0232827	0.00221174	7.4e-28	3.36045e-05	0.000780805	0.97
rs2045820	1	8738135	A	G	0.383178	0.0229267	0.00212228	2.2e-29	0.000261508	0.000749206	0.73
rs4908507	1	8738937	C	T	0.383413	0.0227977	0.00212367	4.1e-29	0.000276633	0.000749659	0.71
rs11121216	1	8738944	A	G	0.382974	0.0227873	0.00212311	4.5e-29	0.000257717	0.000749455	0.73
rs10746481	1	8740713	A	G	0.188149	0.0226021	0.0026441	1e-18	0.000770097	0.000936102	0.41
rs7556169	1	8741401	A	G	0.374558	0.0222835	0.00213061	2.1e-27	0.000182575	0.000752288	0.81
rs6693009	1	8743710	A	G	0.375342	0.0223922	0.00213198	1e-27	9.93018e-05	0.000752705	0.9
1:8744901_CCATT_C	1	8744901	CCATT	C	0.188224	0.0227856	0.00264775	6.3e-19	0.000668942	0.000937355	0.48
rs7554164	1	8745124	T	C	0.188364	0.0227102	0.00264411	6.8e-19	0.000735158	0.000936144	0.43
rs6687239	1	8745476	C	T	0.188385	0.0226943	0.00264409	7.4e-19	0.000749841	0.000936126	0.42
rs36119826	1	8745486	A	AT	0.188557	0.0229057	0.00264827	4e-19	0.000643447	0.000937592	0.49
rs6702457	1	8745711	T	C	0.188369	0.0226656	0.00264419	8.1e-19	0.000757695	0.000936138	0.42
rs35463090	1	8745807	G	A	0.806695	0.0222653	0.00264499	2.3e-19	-0.00145966	0.0009275	0.12
rs2895941	1	8746164	C	T	0.188379	0.0226238	0.00264428	9.1e-19	0.000762255	0.000936174	0.42
rs7533442	1	8750591	G	T	0.188522	0.0226341	0.00264445	9.8e-19	0.00075469	0.000936422	0.42
rs6682498	1	8751146	G	C	0.188534	0.0226482	0.00264447	9.6e-19	0.000736587	0.00093643	0.43
rs6658881	1	8751268	C	T	0.188515	0.022613	0.00264458	1.1e-18	0.000738649	0.000936457	0.43
rs55723477	1	8752403	C	CT	0.215903	0.0236755	0.00257606	2.5e-21	0.000689521	0.00091167	0.45
rs144018056	1	8754088	C	CA	0.608286	0.0137236	0.00219358	3e-11	-0.00133501	0.000771084	0.083
rs12075458	1	8758794	C	A	0.377134	0.0221876	0.00213154	8.9e-27	0.000271144	0.000752143	0.72
rs7551149	1	8761302	G	A	0.171289	0.022056	0.00274371	3.9e-16	0.000663089	0.000971365	0.49
rs7551227	1	8761383	G	A	0.169564	0.0218308	0.00276722	8.1e-16	0.000519826	0.000979589	0.6
rs7554486	1	8762357	G	A	0.370131	0.0216722	0.002141	4.9e-25	0.000107134	0.000755653	0.89
rs10864364	1	8767780	C	A	0.171516	0.0221306	0.00274431	3e-16	0.000634816	0.000971653	0.51
rs4908773	1	8769728	T	C	0.17068	0.0224975	0.00275102	1.3e-16	0.000708557	0.000974174	0.47
rs12125525	1	8770538	A	G	0.670362	0.0249838	0.00219925	4.3e-34	-0.000711516	0.000772259	0.36
rs11121224	1	8773515	A	G	0.377897	0.0221209	0.00213336	1.4e-26	0.00029365	0.000752753	0.7
rs953043	1	8774451	T	C	0.669605	0.0249829	0.00219903	4.5e-34	-0.000600932	0.000772086	0.44
rs12030885	1	8781396	A	G	0.378299	0.022158	0.00213318	1.1e-26	0.000225739	0.000752703	0.76
rs2401188	1	8784950	C	A	0.169291	0.0216853	0.00277501	1.5e-15	0.000642933	0.000982371	0.51
rs12128827	1	8788155	T	C	0.669952	0.0250598	0.00220042	3.4e-34	-0.000668359	0.000772562	0.39
rs7518204	1	8788636	T	C	0.170904	0.0224486	0.00275154	1.4e-16	0.000702058	0.00097432	0.47
rs35466248	1	8789472	C	CG	0.378846	0.0221674	0.00213773	1.2e-26	0.00024347	0.000754297	0.75
1:8791839_TTTTG_T	1	8791839	TTTTG	T	0.148815	0.0216181	0.00297745	2.1e-13	0.000533118	0.00105331	0.61
rs771122744	1	8791840	TTTG	T	0.157923	0.0211265	0.00287447	9.5e-14	0.000866201	0.00101776	0.39
rs12564643	1	8793022	A	C	0.380254	0.0221406	0.00213888	1.9e-26	0.000246371	0.000754714	0.74
rs770167395	1	8799882	TTAA	T	0.380459	0.0223083	0.00214028	1e-26	0.000181514	0.000755126	0.81
rs4908776	1	8804033	T	C	0.176813	0.0229779	0.00274337	1.2e-17	0.000423545	0.000971624	0.66
rs12024032	1	8808185	C	T	0.412115	0.0196975	0.00210735	7.7e-22	-0.000403805	0.000743004	0.59
1:8811836_TAAAAA_T	1	8811836	TAAAAA	T	0.646836	0.0235363	0.00218246	1.3e-30	-0.000740456	0.000766475	0.33
rs765311993	1	8812010	CA	C	0.187375	0.0198788	0.00271305	2.7e-13	0.000679183	0.000960568	0.48
rs12028160	1	8812214	C	T	0.412059	0.0197278	0.00210719	6.6e-22	-0.000398912	0.000742938	0.59
rs4908511	1	8812390	G	C	0.412079	0.0197338	0.00210723	6.4e-22	-0.000400954	0.000742946	0.59
rs7533113	1	8813243	C	T	0.173839	0.022584	0.00274437	7.2e-17	0.000512562	0.000971807	0.6
rs12144098	1	8816173	G	A	0.647741	0.0236619	0.0021776	7.1e-31	-0.000773829	0.000764816	0.31
rs12403640	1	8817863	C	T	0.412174	0.0197328	0.00210713	6.3e-22	-0.000420632	0.000742923	0.57
rs2401189	1	8818600	G	A	0.412184	0.0197422	0.00210728	6.1e-22	-0.000426088	0.000742965	0.57
rs2401190	1	8818612	A	G	0.17422	0.0223539	0.00274259	1.3e-16	0.000480812	0.000971307	0.62
rs6577521	1	8826589	C	G	0.173452	0.0224799	0.00274413	9.4e-17	0.000555942	0.000971728	0.57
rs568945692	1	8827663	C	CA	0.683264	0.0252871	0.00229754	3.2e-32	-0.000586828	0.000806659	0.47
1:8827741_TA_T	1	8827741	TA	T	0.413145	0.0192823	0.00211216	6e-21	-0.000249903	0.000744612	0.74
rs111903008	1	8831581	CA	C	0.407473	0.0192071	0.00213921	1.7e-20	-0.0003471	0.000754231	0.65
rs4908513	1	8832374	T	C	0.173703	0.0223382	0.0027429	1.3e-16	0.000543166	0.000971424	0.58
rs10864366	1	8832499	T	C	0.174026	0.0225031	0.00274114	8e-17	0.000535746	0.000970998	0.58
rs6677718	1	8832944	T	C	0.411495	0.0196747	0.00210598	7.5e-22	-0.000370709	0.000742499	0.62
rs759360600	1	8834783	GAATT	G	0.429451	0.0179769	0.00209949	2.7e-18	-5.83453e-05	0.000740049	0.94
rs6577522	1	8834979	A	G	0.173802	0.0224138	0.00274236	1.1e-16	0.000530364	0.000971233	0.59
rs6577523	1	8836450	A	G	0.173464	0.0225401	0.00274392	7.9e-17	0.000555366	0.000971674	0.57
rs36090225	1	8837949	T	TA	0.686573	0.0245605	0.00233388	1.5e-29	-0.000475965	0.000819937	0.56
rs12123076	1	8838528	A	G	0.683678	0.0245937	0.00223612	1.1e-31	-0.000587997	0.000785354	0.45
rs7556144	1	8838731	G	A	0.173832	0.0223892	0.00274214	1.2e-16	0.000536685	0.000971164	0.58
rs7513880	1	8839300	G	A	0.428277	0.0182276	0.00209369	7.4e-19	-0.000151533	0.000738056	0.84
rs6697719	1	8844525	T	A	0.902175	0.0207811	0.0034882	3.5e-10	-0.000397857	0.00122405	0.75
rs4908514	1	8844600	C	T	0.173878	0.0223334	0.00274174	1.4e-16	0.000503875	0.000971019	0.6
rs10864367	1	8847380	C	T	0.428368	0.0182113	0.00209379	8.4e-19	-0.000137772	0.000738094	0.85
rs34684190	1	8848725	G	GT	0.244336	0.0170785	0.00255095	7.5e-12	2.69633e-05	0.000901405	0.98
rs11121232	1	8850709	C	A	0.428331	0.0181385	0.00209351	1.1e-18	-0.000120846	0.000737955	0.87
rs58263761	1	8851929	T	A	0.902355	0.0208915	0.00348109	2.3e-10	-0.000253818	0.00122171	0.84
rs6698830	1	8854545	C	T	0.428117	0.0181613	0.00209342	9.4e-19	-0.000105028	0.000737953	0.89
rs6577524	1	8856972	C	T	0.173249	0.0225491	0.0027451	8e-17	0.000483078	0.000972047	0.62
rs6577525	1	8857104	G	A	0.173446	0.0224361	0.0027439	1.1e-16	0.000540284	0.000971676	0.58
1:8857435_TA_T	1	8857435	TA	T	0.153047	0.0211496	0.00299209	1.3e-12	0.000555242	0.0010598	0.6
rs6664000	1	8858532	C	T	0.173218	0.0225354	0.00274516	8.2e-17	0.000496707	0.000972082	0.61
rs6690928	1	8859491	G	C	0.428415	0.018102	0.00209345	1.3e-18	-0.000104411	0.000737947	0.89
rs115777450	1	8860955	C	T	0.903212	0.0211153	0.00350025	1.5e-10	-0.000220158	0.00122825	0.86
1:8861332_CT_C	1	8861332	CT	C	0.445324	0.0136902	0.00222755	3.1e-11	-0.000393135	0.0007841	0.62
rs12143686	1	8863453	C	T	0.428371	0.0181643	0.00209345	9.7e-19	-0.000113836	0.000737929	0.88
rs1472228	1	8864680	C	T	0.173794	0.0222714	0.00274225	1.7e-16	0.000517504	0.000971225	0.59
1:8864812_CA_C	1	8864812	CA	C	0.429626	0.0179096	0.00209994	4.1e-18	-3.39909e-05	0.000740172	0.96
rs6577526	1	8865067	G	T	0.178622	0.0220191	0.00274259	4.8e-16	0.000877333	0.000971184	0.37
rs6577527	1	8865497	G	C	0.17344	0.0224251	0.00274393	1.1e-16	0.000537444	0.000971689	0.58
rs2029706	1	8867301	G	A	0.664463	0.0228655	0.00220187	4.8e-28	-0.000594937	0.000773382	0.44
rs7517436	1	8870876	G	T	0.174228	0.0222716	0.00274575	2.3e-16	0.000598389	0.00097211	0.54
rs7555126	1	8871485	A	G	0.175853	0.0220817	0.00273284	2.7e-16	0.000500591	0.000967778	0.6
rs7546225	1	8871965	C	T	0.66436	0.0229844	0.00220258	3.2e-28	-0.000578736	0.000773668	0.45
rs12726274	1	8873011	A	C	0.664526	0.0231287	0.00220486	1.6e-28	-0.000530755	0.000774418	0.49
rs7550782	1	8873727	A	G	0.0902403	0.0249854	0.00366422	5.8e-12	-2.02598e-05	0.00129708	0.99
rs1826583	1	8878481	C	A	0.174514	0.0222125	0.0027422	2.5e-16	0.000524242	0.000971169	0.59
rs34909330	1	8878959	A	AT	0.188549	0.0211275	0.00283274	4.4e-14	0.00088434	0.0010035	0.38
1:8879327_TA_T	1	8879327	TA	T	0.413433	0.0186765	0.0021514	2.9e-18	-1.49828e-05	0.000758439	0.98
rs2185205	1	8882664	T	A	0.424532	0.0183583	0.00210364	7.4e-19	-0.000354848	0.000741606	0.63
rs2131676	1	8885551	A	C	0.424343	0.0183745	0.00210421	6.8e-19	-0.000325062	0.00074183	0.66
rs6678590	1	8886422	T	C	0.17212	0.0219424	0.00275878	1.1e-15	0.000314253	0.000977807	0.75
rs4908781	1	8887937	T	C	0.424249	0.0184027	0.00210561	6e-19	-0.000337325	0.000742325	0.65
rs4908782	1	8888114	C	T	0.664465	0.0229618	0.00220932	4e-28	-0.000873074	0.000775829	0.26
rs11121239	1	8888842	G	A	0.665195	0.0229585	0.0022107	4.7e-28	-0.000895847	0.000776343	0.25
rs2131677	1	8889348	C	A	0.173709	0.0218698	0.00276959	1.7e-15	0.000427987	0.000981586	0.66
rs6577528	1	8891032	C	T	0.424601	0.0185064	0.00210758	4e-19	-0.000376777	0.000743021	0.61
rs4908518	1	8892577	A	G	0.424982	0.0185443	0.00210838	3.1e-19	-0.000390016	0.000743296	0.6
rs6577529	1	8893500	A	G	0.168573	0.0214495	0.00278465	1.7e-14	0.000644757	0.000986536	0.51
rs12068123	1	8894346	G	A	0.420641	0.0177637	0.00211453	1.2e-17	-0.000646946	0.000745341	0.39
rs11121240	1	8894357	A	T	0.42057	0.0177418	0.0021145	1.3e-17	-0.00063321	0.00074535	0.4
rs7530406	1	8895448	C	T	0.419099	0.0178819	0.00211397	6.7e-18	-0.000605968	0.000745205	0.42
rs6577531	1	8896717	G	C	0.164493	0.0203881	0.00281307	5e-13	0.000400638	0.000996911	0.69
rs3866804	1	8898975	G	C	0.163944	0.020363	0.00281386	4.9e-13	0.000474269	0.000997012	0.63
rs6577532	1	8899305	C	T	0.164361	0.0201275	0.00281148	8.4e-13	0.00047675	0.000996379	0.63
rs6577533	1	8900944	A	G	0.164182	0.020536	0.00281243	3.1e-13	0.000475994	0.000996652	0.63
1:8902083_CT_C	1	8902083	CT	C	0.440029	0.0126332	0.00214373	3.8e-10	-0.000772175	0.000755746	0.31
rs12125668	1	8903858	T	C	0.162164	0.0201552	0.00283024	2e-12	0.000659497	0.00100225	0.51
rs12124851	1	8903931	A	G	0.685137	0.0184083	0.00223684	7.4e-18	-0.000847928	0.000785828	0.28
1:8904058_CT_C	1	8904058	CT	C	0.172486	0.0198211	0.00278441	2.4e-12	0.000768087	0.000986419	0.44
1:8907205_TTTG_T	1	8907205	TTTG	T	0.169097	0.0201207	0.00278869	1e-12	0.000747277	0.000988075	0.45
rs6577534	1	8908750	G	A	0.168264	0.01993	0.00277622	1.2e-12	0.000623295	0.000983438	0.53
rs4908785	1	8909078	T	C	0.168062	0.0191462	0.00278964	6.3e-12	0.000536585	0.000988135	0.59
rs6577535	1	8910095	T	A	0.166628	0.019014	0.00278484	1.9e-11	0.000272467	0.000986481	0.78
rs12135416	1	8910347	G	A	0.677962	0.0176908	0.00221213	5.8e-17	-0.000790879	0.00077734	0.31
rs6676113	1	8910544	T	C	0.165341	0.0189596	0.00278433	2e-11	0.000277316	0.000986205	0.78
rs6684644	1	8910578	G	C	0.678164	0.0176401	0.00221196	7.1e-17	-0.00080639	0.000777286	0.3
rs6673587	1	8910705	A	T	0.677575	0.017467	0.00221122	1.4e-16	-0.000786502	0.000777219	0.31
rs4908786	1	8910943	A	G	0.165433	0.0189075	0.0027823	2.2e-11	0.000300367	0.000985471	0.76
rs6663876	1	8910986	C	T	0.677554	0.0174923	0.00221089	1.3e-16	-0.000810186	0.00077706	0.3
1:8911078_ATCG_A	1	8911078	ATCG	A	0.678186	0.0175224	0.0022234	1.4e-16	-0.00081367	0.000781333	0.3
rs6677249	1	8911834	A	G	0.173922	0.0190602	0.00272619	4.8e-12	0.000520406	0.000965775	0.59
rs68080626	1	8912627	G	A	0.177408	0.0190905	0.00272611	5.8e-12	0.00044141	0.000965507	0.65
rs6676285	1	8913181	G	T	0.174611	0.0190457	0.00272011	4.2e-12	0.000513891	0.000963609	0.59
rs4908787	1	8913369	T	A	0.174155	0.0188365	0.00272366	7.9e-12	0.000527476	0.000964545	0.58
rs4908788	1	8913412	C	G	0.174032	0.0190855	0.0027259	4.1e-12	0.000486572	0.000965409	0.61
rs12732817	1	8913612	C	G	0.177117	0.0193988	0.00270635	1.1e-12	0.000747664	0.000958404	0.44
1:8913653_AAG_A	1	8913653	AAG	A	0.71867	0.0164469	0.0023887	4.4e-13	-0.00063178	0.000839169	0.45
rs6577538	1	8914396	T	C	0.17712	0.0193642	0.00270686	1.2e-12	0.000737745	0.000958542	0.44
rs914994	1	8917212	G	T	0.682078	0.0178859	0.00221536	2.1e-17	-0.000671279	0.000778449	0.39
rs2047095	1	8917956	T	C	0.17593	0.0194356	0.00271519	1.1e-12	0.000823645	0.000961424	0.39
rs11121247	1	8918795	T	C	0.176029	0.0195094	0.0027137	8.2e-13	0.0008133	0.000960848	0.4
rs1971492	1	8920030	T	C	0.176055	0.0194654	0.00271382	8.7e-13	0.000804917	0.000960835	0.4
rs1543711	1	8924282	A	G	0.176262	0.0195597	0.00271263	5.8e-13	0.000792768	0.000960496	0.41
rs2781068	1	8924921	C	T	0.17579	0.0193282	0.00271563	1.2e-12	0.000790107	0.000961398	0.41
rs2765507	1	8925112	T	C	0.445727	0.013355	0.00207384	1.4e-11	4.38735e-06	0.000730978	1
rs2781067	1	8925929	A	G	0.175438	0.0194306	0.00271823	9e-13	0.000776983	0.000962178	0.42
rs3831913	1	8926285	A	AG	0.446313	0.0132657	0.0020745	1.7e-11	2.34021e-05	0.00073118	0.97
rs2781066	1	8926329	C	T	0.820567	0.0163779	0.00273145	5.8e-10	-0.000895166	0.000959491	0.35
rs2781065	1	8926752	T	C	0.175681	0.0195561	0.00271715	6.9e-13	0.000781495	0.000961915	0.42
rs2781064	1	8926868	C	T	0.44599	0.0133902	0.00207408	1.2e-11	2.65434e-05	0.000731018	0.97
rs765503956	1	8927610	AAT	A	0.446522	0.0132596	0.0020763	2e-11	4.32765e-05	0.000731741	0.95
rs35848392	1	8928907	A	AT	0.491476	0.0143052	0.00207789	7.3e-13	-0.000276512	0.000731995	0.71
rs34427097	1	8929488	C	CG	0.445808	0.0133459	0.00207694	1.4e-11	1.97061e-05	0.000732008	0.98
rs2781060	1	8930369	T	C	0.176035	0.0195122	0.00271687	8e-13	0.000813207	0.000962088	0.4
rs2765511	1	8930385	G	A	0.176105	0.0196237	0.00271675	6.4e-13	0.000803539	0.000962054	0.4
rs1006950	1	8931463	T	C	0.176205	0.0196424	0.00271577	5.2e-13	0.000816939	0.000961806	0.4
rs4908519	1	8932413	C	T	0.446436	0.01346	0.00207642	8.8e-12	4.62591e-07	0.000731822	1
rs111671523	1	8932446	C	CTT	0.175223	0.01947	0.00272931	1.1e-12	0.000716151	0.000966179	0.46
rs6660137	1	8933242	G	A	0.175676	0.0195234	0.00272131	8.2e-13	0.000781916	0.00096343	0.42
rs3820037	1	8934237	C	T	0.176409	0.0198448	0.00271613	3.1e-13	0.000761032	0.000962077	0.43
rs2038904	1	8935149	A	G	0.175592	0.0195847	0.00272152	6.7e-13	0.00076667	0.000963507	0.43
rs150798497	1	8936903	A	AT	0.447438	0.0135144	0.00208457	1.2e-11	-4.77927e-05	0.000734629	0.95
rs61784221	1	8937703	T	G	0.439208	0.0131811	0.00209603	3.7e-11	-3.17852e-05	0.000738679	0.97
1:8937769_CA_C	1	8937769	CA	C	0.157311	0.0233985	0.00285816	2.2e-16	8.99404e-06	0.0010136	0.99
rs201853842	1	8937773	A	C	0.157311	0.0233991	0.00285817	2.2e-16	9.04105e-06	0.0010136	0.99
1:8937935_CA_C	1	8937935	CA	C	0.130172	0.0262503	0.00322154	3.3e-16	-6.62106e-05	0.0011425	0.95
rs11811795	1	8938057	T	C	0.15678	0.0230175	0.00285221	6.9e-16	0.000278092	0.00101163	0.78
rs1359591	1	8939310	G	A	0.444422	0.0133456	0.00208346	1.7e-11	-6.65478e-05	0.00073426	0.93
rs1325920	1	8939842	G	A	0.157253	0.0231209	0.0028496	3.9e-16	0.000233205	0.00101075	0.82
rs5772337	1	8940151	G	GA	0.167132	0.0234776	0.00283757	1.3e-16	3.57231e-05	0.00100614	0.97
rs7536304	1	8942158	T	A	0.444316	0.0137393	0.00208098	3.4e-12	-5.33183e-05	0.000733404	0.94
rs61784222	1	8942665	T	C	0.156856	0.023028	0.0028539	5.6e-16	0.000233302	0.00101198	0.82
rs34621977	1	8942842	A	AT	0.195884	0.0194651	0.00271348	2.8e-13	-0.000324119	0.000960083	0.74
rs11121248	1	8943248	G	A	0.444582	0.0137973	0.00208091	2.8e-12	-7.90012e-05	0.000733398	0.91
1:8946362_ACT_A	1	8946362	ACT	A	0.442271	0.0136175	0.00209052	7e-12	-0.000169917	0.000736752	0.82
1:8947480_CT_C	1	8947480	CT	C	0.205096	0.0184697	0.00263096	9e-13	0.000184698	0.000930331	0.84
rs11121251	1	8948888	C	G	0.498808	0.012507	0.00207142	8.9e-11	0.000124184	0.000729852	0.86
rs70985540	1	8949070	A	AT	0.202962	0.0172754	0.00259408	1.5e-11	0.00030826	0.000917547	0.74
rs28613332	1	8949073	A	T	0.416974	0.0126346	0.00223365	2.7e-09	-8.032e-05	0.000787562	0.92
rs7539600	1	8949480	A	G	0.20312	0.0170743	0.00258292	2.3e-11	0.000327818	0.000913561	0.72
rs12122136	1	8950704	A	G	0.475905	0.0121049	0.00207372	4.7e-10	0.000303648	0.000730683	0.68
rs6677265	1	8950720	C	T	0.475853	0.0120906	0.00207383	4.8e-10	0.00030214	0.000730732	0.68
rs12119580	1	8953135	A	G	0.202839	0.0176536	0.00259839	7.1e-12	0.000414709	0.000918969	0.65
rs11121252	1	8956946	T	C	0.150269	0.0222682	0.00291458	2.3e-14	0.000266252	0.00103373	0.8
rs6698322	1	8958110	A	C	0.471165	0.0113074	0.00207776	4.9e-09	0.000353313	0.000732069	0.63
rs12139087	1	8961530	C	T	0.147869	0.0222414	0.00294314	5.3e-14	0.000260046	0.00104393	0.8
rs12129070	1	8961863	T	C	0.387868	0.0131118	0.00213521	2.2e-10	1.15773e-05	0.000752728	0.99
rs1977624	1	8962079	A	T	0.151436	0.0237677	0.00294829	2.9e-15	-0.000159409	0.00104637	0.88
rs6666946	1	8962827	T	C	0.339356	0.0145028	0.00219341	1.1e-11	-0.000148069	0.000773602	0.85
rs12124592	1	8963291	A	G	0.33942	0.0145108	0.00219347	1e-11	-0.00015757	0.000773627	0.84
rs12135673	1	8963453	C	T	0.339569	0.0143869	0.0021932	1.5e-11	-0.000106309	0.00077352	0.89
rs28620458	1	8963855	G	A	0.761915	0.014218	0.00243516	9.3e-10	-0.000580476	0.000854568	0.5
rs60781953	1	8966349	T	TA	0.682127	0.0131985	0.00226396	3.4e-09	-0.00089557	0.000794875	0.26
rs11121254	1	8967028	A	G	0.338956	0.0149918	0.00220729	3.4e-12	-0.0002854	0.000778368	0.71
rs11121255	1	8967124	A	G	0.338935	0.0149912	0.00220722	3.3e-12	-0.000269661	0.000778343	0.73
rs11121256	1	8967156	T	C	0.33893	0.0149899	0.00220721	3.4e-12	-0.000271039	0.000778341	0.73
rs12132159	1	8967216	G	A	0.352829	0.0140403	0.00220733	1.4e-10	-0.000376631	0.000778262	0.63
rs1812348	1	8967863	A	G	0.338358	0.0143481	0.00219572	2e-11	-0.000133871	0.00077432	0.86
rs10864369	1	8968350	T	C	0.338349	0.0143038	0.00219563	2.3e-11	-0.00013687	0.000774275	0.86
rs7534552	1	8969219	G	A	0.349672	0.0134701	0.00217818	1.5e-10	-0.000260779	0.000768019	0.73
rs12136234	1	8971030	G	A	0.691429	0.012868	0.00224045	3.9e-09	-0.00100592	0.000786386	0.2
rs12134990	1	8972621	T	C	0.691822	0.0129826	0.00224683	3.3e-09	-0.000974748	0.000788663	0.22
1:8972829_TA_T	1	8972829	TA	T	0.62723	0.0127389	0.00219744	2.4e-09	-0.000928314	0.000772006	0.23
rs11121257	1	8972865	G	A	0.69162	0.0129096	0.00223988	4.1e-09	-0.000992602	0.000786199	0.21
rs11121258	1	8972964	A	G	0.691621	0.0129173	0.00223984	4e-09	-0.000992863	0.000786185	0.21
rs11121259	1	8973119	G	A	0.691964	0.0132151	0.0022465	2e-09	-0.000974878	0.000788519	0.22
rs6699210	1	8973164	T	C	0.349751	0.0135297	0.00217757	1.4e-10	-0.000313502	0.000767825	0.68
rs12127814	1	8973533	G	A	0.691785	0.0128542	0.00224039	4.7e-09	-0.000989137	0.000786387	0.21
rs12127844	1	8973567	G	A	0.772304	0.0137974	0.00246948	3.6e-09	-0.000915796	0.000866423	0.29
rs6668049	1	8978292	T	C	0.34899	0.0134552	0.00217792	2e-10	-0.00027051	0.000767951	0.72
rs6668426	1	8978646	T	G	0.349143	0.0134327	0.00217684	2.1e-10	-0.00026484	0.000767597	0.73
1:8978913_TA_T	1	8978913	TA	T	0.355149	0.0134473	0.00219515	5.2e-10	-0.000238165	0.000773922	0.76
1:10274560_CA_C	1	10274560	CA	C	0.872401	-0.0165582	0.00309166	6.1e-09	-0.000653471	0.00109125	0.55
rs6702280	1	10280774	G	A	0.872542	-0.0165763	0.0030927	5.7e-09	-0.000661127	0.00109151	0.54
rs140885528	1	10283187	G	GCC	0.87175	-0.0168201	0.00309405	3.5e-09	-0.000621154	0.00109205	0.57
rs147613335	1	10284267	C	T	0.872472	-0.0165474	0.0030921	6e-09	-0.000651925	0.0010913	0.55
1:10284785_AT_A	1	10284785	AT	A	0.872398	-0.0166495	0.00309142	4.9e-09	-0.000647313	0.00109109	0.55
rs4846204	1	10308958	C	T	0.872796	-0.0166695	0.00309587	4.7e-09	-0.000789137	0.00109237	0.47
1:10310049_TG_T	1	10310049	TG	T	0.872523	-0.0165399	0.00309246	6.1e-09	-0.000628569	0.00109146	0.56
rs151178549	1	10312444	T	TTTGTTG	0.711106	0.0140716	0.00229279	4.1e-09	-1.66543e-05	0.00232236	0.99
rs12137527	1	10315297	G	A	0.872386	-0.0167009	0.00309135	4.5e-09	-0.000660354	0.00109102	0.55
rs17400878	1	10316729	A	G	0.872928	-0.016605	0.00309653	5.2e-09	-0.00072442	0.00109258	0.51
rs12139158	1	10325610	A	G	0.872375	-0.0166825	0.00309241	4.7e-09	-0.000642115	0.00109138	0.56
rs139057101	1	10334255	C	CA	0.872884	-0.0166801	0.00310104	5.1e-09	-0.000703759	0.0010946	0.52
rs12120499	1	10343260	G	A	0.872755	-0.0166465	0.00309706	4.4e-09	-0.000770608	0.00109272	0.48
rs111368727	1	10343297	T	A	0.801426	0.0182041	0.00289852	1.4e-09	0.00171936	0.00102174	0.092
rs17397129	1	10345462	A	G	0.872724	-0.0167085	0.00309633	4.4e-09	-0.000722818	0.00109252	0.51
rs17401588	1	10368099	A	G	0.872714	-0.0168408	0.00309804	3.3e-09	-0.000835232	0.00109301	0.44
1:10370712_CTGTG_C	1	10370712	CTGTG	C	0.871746	-0.0169518	0.00309156	2.5e-09	-0.000729282	0.00109097	0.5
rs4846217	1	10451799	C	T	0.875628	-0.0165144	0.00313055	3.8e-09	-0.00107633	0.00110509	0.33
1:10465886_CG_C	1	10465886	CG	C	0.877383	-0.0164727	0.00315394	5.3e-09	-0.00108176	0.00111297	0.33
rs72867498	1	10499064	T	C	0.899771	-0.0218403	0.00356598	4.3e-10	-0.000154727	0.00125974	0.9
rs76730171	1	10506981	C	G	0.846791	-0.0173273	0.00288637	3.2e-10	-0.00056131	0.00101902	0.58
rs769928416	1	10523728	CT	C	0.825351	-0.0175706	0.00283527	8.1e-11	6.98686e-05	0.00100076	0.94
rs564849257	1	10524153	A	AT	0.833767	-0.0178152	0.00282368	2.2e-11	-0.000229107	0.000996413	0.82
rs74225522	1	10537420	C	A	0.827409	-0.0169016	0.0027446	4.6e-11	-0.000113738	0.000968533	0.91
rs60321516	1	10538147	A	G	0.856914	-0.0161903	0.00296641	2.8e-09	-0.000334665	0.0010467	0.75
rs143427354	1	10542609	G	A	0.857944	-0.016403	0.00296887	1.6e-09	-0.000315826	0.0010475	0.76
rs76927098	1	10542940	T	A	0.827785	-0.0172348	0.00273977	1.7e-11	-8.1686e-05	0.000966712	0.93
rs9970001	1	10543836	A	G	0.827395	-0.0171145	0.00273763	2.3e-11	-8.06265e-05	0.000966138	0.93
rs4846228	1	10552718	C	T	0.828044	-0.0171567	0.00273855	2.1e-11	4.35789e-05	0.000966254	0.96
rs74810178	1	10560988	A	G	0.828264	-0.0176618	0.0027423	6.2e-12	-9.13989e-05	0.000967495	0.92
rs58975800	1	10561559	C	T	0.859035	-0.0168626	0.00298632	6.2e-10	-0.000248235	0.00105383	0.81
rs76282123	1	10562163	C	T	0.828238	-0.0177131	0.00274135	5.2e-12	-6.90864e-05	0.000967097	0.94
1:10564774_TTTTCC_T	1	10564774	TTTTCC	T	0.832888	-0.0179499	0.00280133	8.7e-12	0.000378885	0.000988143	0.7
rs61192982	1	10565343	C	T	0.859609	-0.0171316	0.00298399	4e-10	7.06109e-05	0.00105274	0.95
rs2480787	1	10565372	G	A	0.178847	0.0179309	0.00269914	2.7e-12	-1.35033e-05	0.00095284	0.99
rs2506878	1	10566095	C	A	0.179937	0.0181844	0.00269614	1.6e-12	6.08902e-05	0.000952165	0.95
rs2506879	1	10566668	A	G	0.157736	0.0172567	0.00283423	3.6e-11	0.000254274	0.00100039	0.8
rs2480786	1	10567658	C	T	0.157818	0.0172349	0.00283275	3.7e-11	0.000261294	0.000999904	0.79
rs2506884	1	10579650	G	C	0.159362	0.0166611	0.00281938	1.5e-10	0.000147491	0.000995445	0.88
rs74225528	1	10579808	T	C	0.841472	-0.0161519	0.0028253	5.3e-10	-0.000107289	0.000997424	0.91
rs2483678	1	10582047	T	C	0.159262	0.0166667	0.00281989	1.6e-10	0.000122171	0.000995658	0.9
rs2506886	1	10583531	A	G	0.159276	0.0166579	0.00281974	1.6e-10	0.000131273	0.000995612	0.9
rs7522072	1	10584346	T	C	0.841644	-0.016195	0.00282606	5.1e-10	-0.000105508	0.000997748	0.92
rs2506887	1	10584672	G	A	0.159275	0.016661	0.00281975	1.6e-10	0.000132532	0.000995616	0.89
rs2506888	1	10584738	A	T	0.178342	0.0191518	0.00270182	7.4e-14	-0.000144133	0.000953874	0.88
rs2480789	1	10585046	C	T	0.168004	0.0178756	0.00275997	5.1e-12	-6.25121e-05	0.000975102	0.95
rs17035156	1	10585527	C	A	0.841681	-0.0162679	0.00282643	4.7e-10	-0.000101181	0.000997766	0.92
rs2988399	1	10586801	T	A	0.176572	0.0173431	0.00270533	6.7e-12	-0.000306885	0.000954716	0.75
rs2039176	1	10587794	G	A	0.185351	0.0184513	0.00265397	2.1e-13	-0.000415964	0.000937089	0.66
rs2039175	1	10587841	A	G	0.185368	0.0184666	0.00265389	2e-13	-0.000408764	0.0009371	0.66
rs12403130	1	10592231	C	G	0.85932	-0.0159843	0.00297452	2.2e-09	7.89229e-05	0.00104968	0.94
rs2480781	1	10593541	T	A	0.172576	0.0192735	0.00272824	1.6e-13	-0.000261188	0.000963291	0.79
rs2480780	1	10595211	T	C	0.16362	0.0180539	0.00278743	6.8e-12	-7.72217e-05	0.00098354	0.94
rs10779738	1	10596622	G	A	0.837632	-0.0175127	0.00279753	3e-11	0.000181536	0.000987172	0.85
rs10864461	1	10596624	C	T	0.837621	-0.0174652	0.00279739	3.3e-11	0.000205438	0.00098712	0.84
rs4240914	1	10597217	A	C	0.837103	-0.0176998	0.00279161	1.9e-11	0.000172392	0.000984984	0.86
rs748863301	1	10599643	CAT	C	0.171716	0.019074	0.00273688	3e-13	-0.00019081	0.000966451	0.84
rs6681221	1	10601761	G	A	0.837156	-0.0176626	0.002792	2.1e-11	0.00016125	0.000985072	0.87
rs2988398	1	10602758	C	T	0.172606	0.0192805	0.00272786	1.7e-13	-0.000260841	0.00096319	0.79
rs61394893	1	10602784	C	CTCCA	0.838959	-0.0182512	0.00281595	6.5e-12	0.000134593	0.000993533	0.89
rs760604681	1	10602786	C	CCATT	0.84173	-0.0181523	0.00284673	9.4e-12	0.000107426	0.00100442	0.91
rs2506897	1	10603892	A	G	0.172604	0.0192974	0.00272772	1.6e-13	-0.000282228	0.000963116	0.77
rs2506898	1	10604539	G	A	0.172603	0.0193006	0.00272764	1.6e-13	-0.000287121	0.000963093	0.77
1:10604811_CT_C	1	10604811	CT	C	0.171141	0.0194324	0.00275224	1.2e-13	-0.000387657	0.000971591	0.69
rs2480775	1	10606996	G	T	0.173942	0.0195007	0.00271843	7e-14	-0.000398074	0.000959834	0.68
rs944191	1	10607451	T	C	0.825894	-0.018909	0.00271772	3.3e-13	0.000544926	0.000959339	0.57
rs4846230	1	10608596	T	C	0.1753	0.0194683	0.00270914	6.5e-14	-0.00057854	0.000956519	0.55
rs2480773	1	10609090	C	T	0.175356	0.0193833	0.00270849	8.1e-14	-0.000563482	0.000956272	0.56
rs12128630	1	10609395	C	T	0.825566	-0.0189404	0.00271467	3.1e-13	0.000594329	0.000958382	0.54
rs2480772	1	10609460	C	T	0.175443	0.019449	0.00270805	6.9e-14	-0.000529078	0.000956134	0.58
rs2183377	1	10610129	G	A	0.834179	-0.0177052	0.00276974	1.2e-11	0.00045931	0.000977294	0.64
rs2506900	1	10610876	G	A	0.175364	0.0194002	0.00270912	7.8e-14	-0.000565569	0.000956502	0.55
rs2480771	1	10611594	A	T	0.175368	0.0193858	0.00270935	8.1e-14	-0.000569206	0.000956586	0.55
rs6700023	1	10612075	G	A	0.175367	0.0193784	0.0027095	8.3e-14	-0.000572852	0.000956642	0.55
rs4846231	1	10612636	A	C	0.17537	0.0193822	0.00270962	8.3e-14	-0.000571929	0.000956686	0.55
rs4846232	1	10612810	T	C	0.175383	0.0193642	0.00270973	8.7e-14	-0.000583758	0.000956722	0.54
rs10157111	1	10613344	T	G	0.825529	-0.0188593	0.0027162	3.9e-13	0.00061934	0.000958938	0.52
rs10157119	1	10613497	T	C	0.825857	-0.0188354	0.00271867	4.3e-13	0.000562954	0.000959679	0.56
rs10864463	1	10613560	A	G	0.175398	0.0193072	0.0027102	9.9e-14	-0.000590154	0.000956895	0.54
rs35612158	1	10614233	C	T	0.825519	-0.0188886	0.00271658	3.7e-13	0.000628374	0.000959082	0.51
rs10779739	1	10615189	C	A	0.175635	0.0192913	0.00271013	1.1e-13	-0.000529574	0.000956904	0.58
rs11121584	1	10615775	T	C	0.175403	0.0192858	0.00271069	1.1e-13	-0.000598007	0.000957077	0.53
rs4846233	1	10616228	G	A	0.175413	0.0192637	0.00271074	1.1e-13	-0.000593377	0.000957098	0.54
rs4240915	1	10616484	C	T	0.175401	0.0192866	0.00271081	1.1e-13	-0.000598906	0.000957117	0.53
rs9660006	1	10617272	A	T	0.175198	0.0193033	0.00271216	1e-13	-0.000563232	0.000957537	0.56
rs11121585	1	10617591	T	C	0.175206	0.0193316	0.00271211	9.4e-14	-0.000558579	0.00095753	0.56
1:10617891_CT_C	1	10617891	CT	C	0.175479	0.019472	0.00271156	6.7e-14	-0.000549368	0.000957293	0.57
rs12121311	1	10617906	T	A	0.187538	0.0188726	0.00268187	3.2e-13	-0.000371369	0.00094641	0.69
rs7545184	1	10618804	A	G	0.834324	-0.0178258	0.00277576	9e-12	0.000516879	0.000979242	0.6
rs11121588	1	10618991	A	T	0.175218	0.0193344	0.0027121	9.1e-14	-0.000562667	0.000957539	0.56
rs11121589	1	10618994	C	A	0.175212	0.0193445	0.00271212	8.9e-14	-0.000560278	0.000957547	0.56
rs6658073	1	10619965	G	C	0.175121	0.0192882	0.00271295	1e-13	-0.000564629	0.000957865	0.56
rs6700886	1	10620123	T	C	0.175168	0.0192912	0.00271257	1.1e-13	-0.000564163	0.000957719	0.56
rs61777207	1	10620239	C	T	0.825699	-0.0189039	0.00271829	3.4e-13	0.000597772	0.000959645	0.53
rs10746495	1	10620270	A	G	0.175383	0.019274	0.00271315	1.1e-13	-0.000580465	0.00095788	0.54
rs58788814	1	10621050	A	G	0.834356	-0.0175755	0.0027733	1.5e-11	0.000461402	0.000978513	0.64
rs7512467	1	10622374	A	G	0.834384	-0.0175394	0.00277354	1.7e-11	0.000450363	0.000978577	0.65
rs61777208	1	10623176	T	C	0.825698	-0.0188708	0.00271838	3.7e-13	0.00059872	0.000959679	0.53
rs754039328	1	10624057	CAT	C	0.833614	-0.0176226	0.00277358	1.6e-11	0.000429407	0.000978623	0.66
rs4845936	1	10625495	A	T	0.825694	-0.0188872	0.00271854	3.6e-13	0.00061932	0.00095974	0.52
rs12033275	1	10627542	G	T	0.834308	-0.0175786	0.00277292	1.5e-11	0.000478136	0.000978415	0.63
rs114425920	1	10627701	A	G	0.834313	-0.0175675	0.0027729	1.6e-11	0.000477619	0.000978409	0.63
rs72641424	1	10632615	A	G	0.834293	-0.0175007	0.00277198	1.8e-11	0.000497832	0.000978089	0.61
rs78507554	1	10633489	A	G	0.854694	-0.0161001	0.00293063	1.2e-09	0.000269931	0.00103401	0.79
rs12129678	1	10633651	G	A	0.834375	-0.0173319	0.00277238	2.7e-11	0.000478617	0.000978185	0.62
rs72641427	1	10634195	A	T	0.824177	-0.014711	0.00271377	5.2e-09	0.000334893	0.00095671	0.73
rs10864465	1	10635121	G	A	0.834391	-0.0173244	0.00277357	2.8e-11	0.00047527	0.000978603	0.63
rs11121596	1	10635362	C	T	0.83432	-0.0173984	0.00277308	2.4e-11	0.000496399	0.000978473	0.61
rs11121597	1	10636853	C	T	0.834317	-0.017355	0.00277421	2.6e-11	0.000494682	0.000978879	0.61
rs59163005	1	10637841	T	TA	0.834091	-0.017474	0.00277566	2.3e-11	0.000498727	0.000979371	0.61
1:10641803_TTAATTTA_T	1	10641803	TTAATTTA	T	0.835848	-0.0173738	0.00286348	1.2e-10	0.000389129	0.00101066	0.7
rs12122814	1	11060390	G	A	0.851895	0.0193719	0.0029553	3.4e-12	-0.00198352	0.00104532	0.058
rs9430334	1	11063972	G	A	0.853804	0.0188686	0.00295419	1.4e-11	-0.00156061	0.00104584	0.14
rs543311530	1	11065992	C	CT	0.238703	-0.0159899	0.00270848	1.7e-09	0.0020741	0.000954853	0.03
rs9430167	1	11067792	T	A	0.153938	-0.0189733	0.00286799	2.6e-12	0.00210346	0.00101491	0.038
rs61775596	1	11068986	A	G	0.145737	-0.0191992	0.00293975	5.3e-12	0.00182714	0.00103964	0.079
rs201442337	1	11069138	G	GGCTCACTGCAACCTCT	0.157155	-0.0189386	0.00285477	1.7e-12	0.00221292	0.00101178	0.029
rs3753236	1	11069516	T	C	0.154836	-0.0192589	0.00285643	8.6e-13	0.00222343	0.00101142	0.028
rs9430171	1	11070380	T	C	0.155063	-0.0185579	0.00285357	6.1e-12	0.00204827	0.00101079	0.043
rs9430172	1	11070919	T	G	0.161386	-0.0165929	0.00282864	3e-10	0.00198768	0.00100119	0.047
rs9430335	1	11072117	C	T	0.162843	-0.018879	0.00279655	1.5e-12	0.00144036	0.000989706	0.15
rs4133584	1	11072885	C	T	0.181569	-0.0187701	0.00267807	4.5e-13	0.000571266	0.000949019	0.55
1:11073507_TCA_T	1	11073507	TCA	T	0.163518	-0.0191174	0.00279199	6.6e-13	0.00161597	0.000988639	0.1
rs3765895	1	11074250	A	G	0.163089	-0.0189349	0.00279063	1.3e-12	0.00142838	0.000987656	0.15
rs3765896	1	11074420	G	A	0.162827	-0.0190074	0.00279184	1e-12	0.0014808	0.000988104	0.13
1:11074998_CA_C	1	11074998	CA	C	0.163781	-0.0191555	0.00278638	5.1e-13	0.00159346	0.00098672	0.11
rs7550141	1	11075371	T	C	0.163726	-0.0192271	0.00278665	4.4e-13	0.00159684	0.000986778	0.11
rs9430338	1	11075511	T	C	0.166684	-0.0176308	0.0027741	1.9e-11	0.00143323	0.00098182	0.14
rs35070440	1	11075726	C	CA	0.186382	-0.0181299	0.00268563	2.3e-12	0.000785379	0.000951161	0.41
rs111476811	1	11075825	C	CAG	0.162345	-0.0191366	0.00279653	6.8e-13	0.00156415	0.000989712	0.11
rs57343468	1	11077947	C	CT	0.162852	-0.0189676	0.00279224	9.8e-13	0.00149876	0.000988192	0.13
rs6689580	1	11078225	T	C	0.162717	-0.019048	0.00279234	8.1e-13	0.00153653	0.00098821	0.12
rs6698075	1	11078312	G	C	0.168797	-0.0190705	0.00275516	3.5e-13	0.00187371	0.000975181	0.055
rs147029491	1	11078397	C	T	0.181705	-0.0187319	0.00267553	3.9e-13	0.000636251	0.000948084	0.5
rs138627759	1	11078398	A	AATCTTTG	0.183338	-0.0191181	0.0026747	1.5e-13	0.000688523	0.000947684	0.47
rs386628445	1	11078401	A	ACAGGTG	0.18185	-0.018719	0.00267567	4.1e-13	0.000662772	0.000948131	0.48
rs2273348	1	11079077	A	G	0.181907	-0.0187007	0.00267326	3.7e-13	0.000728951	0.000947211	0.44
rs7546126	1	11079413	T	A	0.162692	-0.0189597	0.00279218	9.5e-13	0.00152837	0.000988174	0.12
rs1967714	1	11079773	A	G	0.162707	-0.0189671	0.00279208	9.5e-13	0.00153442	0.000988193	0.12
rs1967713	1	11079958	A	G	0.162692	-0.0189651	0.00279219	9.4e-13	0.00153068	0.000988181	0.12
rs143130606	1	11080723	T	TG	0.161277	-0.0195004	0.0028048	2.9e-13	0.00163771	0.000991729	0.099
rs1922991	1	11081210	T	A	0.173548	-0.0187651	0.0027737	1.6e-12	0.00191876	0.000982217	0.051
rs1474891	1	11081880	G	T	0.181607	-0.0187505	0.00267436	3.5e-13	0.000674269	0.000947698	0.48
rs200118533	1	11082054	AG	A	0.181546	-0.0187087	0.00267751	4.5e-13	0.000622225	0.000948758	0.51
rs5772439	1	11085004	A	ATGTTT	0.162111	-0.0195352	0.00280235	2.7e-13	0.0016817	0.000990838	0.09
rs3215616	1	11086097	A	AT	0.181363	-0.0187858	0.00267688	3.6e-13	0.000669634	0.000948592	0.48
rs2273347	1	11086332	A	G	0.181433	-0.0187692	0.00267531	3.3e-13	0.000694239	0.000948044	0.46
rs2261695	1	11086439	C	T	0.168882	-0.0189848	0.00275418	4e-13	0.00194199	0.000974882	0.046
rs1033638	1	11086717	A	G	0.16366	-0.0191903	0.00278643	4e-13	0.00170878	0.000986657	0.083
rs1782455	1	11087524	G	A	0.164045	-0.0192607	0.002783	3e-13	0.00168012	0.00098553	0.088
rs1782454	1	11087835	T	C	0.162712	-0.0189635	0.00279213	8.9e-13	0.00161587	0.000988171	0.1
1:11089225_AT_A	1	11089225	AT	A	0.157684	-0.0198265	0.00286895	4.4e-13	0.00175939	0.00101574	0.083
rs1782457	1	11089463	T	A	0.162793	-0.0189313	0.00279151	9.8e-13	0.00160343	0.000988016	0.1
rs12711521	1	11090916	C	A	0.181648	-0.0187712	0.00267335	3.2e-13	0.000592162	0.000947355	0.53
rs17409276	1	11091205	G	A	0.855325	0.0175617	0.00294005	4.3e-10	-0.00216231	0.00104197	0.038
rs6696747	1	11091529	A	T	0.161891	-0.019434	0.00279931	3e-13	0.00168243	0.000990329	0.089
rs6699335	1	11091549	T	G	0.162651	-0.0190054	0.00279444	8.8e-13	0.00160817	0.00098893	0.1
rs7555145	1	11092646	T	C	0.16361	-0.0190458	0.00278981	6.5e-13	0.001644	0.00098775	0.096
rs7555662	1	11093334	A	G	0.162619	-0.0191795	0.00279587	6.1e-13	0.0016337	0.000989573	0.099
rs7544377	1	11093629	C	G	0.162607	-0.019217	0.00279642	5.7e-13	0.00166366	0.000989705	0.093
rs7556039	1	11093741	A	G	0.16197	-0.0195234	0.00280041	2.7e-13	0.00172341	0.000990757	0.082
rs12755574	1	11093894	G	A	0.181303	-0.0190224	0.00267929	1.9e-13	0.000732475	0.0009495	0.44
rs11583653	1	11094204	G	A	0.181376	-0.0189945	0.00267919	2.1e-13	0.000696508	0.00094943	0.46
rs11121684	1	11094665	G	A	0.181676	-0.0188604	0.0026785	2.8e-13	0.000748316	0.000949149	0.43
rs6695096	1	11095039	C	T	0.162715	-0.0193279	0.00279778	4.2e-13	0.00163035	0.000989775	0.1
rs11121685	1	11095424	A	T	0.191499	-0.0182303	0.00262816	6.9e-13	0.000595741	0.000930191	0.52
1:11095951_CAAAA_C	1	11095951	CAAAA	C	0.182537	-0.0182965	0.00276833	7e-12	0.00207101	0.000979357	0.034
rs12732536	1	11096422	G	A	0.194981	-0.0187677	0.00262083	7.1e-14	0.00058986	0.000928275	0.53
rs12136468	1	11099788	G	A	0.214397	-0.0208368	0.0025248	1.5e-17	0.000811589	0.00089336	0.36
rs6657807	1	11099959	A	G	0.284218	-0.0173411	0.00239926	3e-14	-3.9011e-05	0.000847351	0.96
1:11100522_TA_T	1	11100522	TA	T	0.271658	-0.0159993	0.00246396	3.3e-12	0.000515743	0.000870293	0.55
rs61535446	1	11100898	A	G	0.191497	-0.0210892	0.00262518	7.8e-17	0.0016217	0.000927852	0.08
rs61773665	1	11101413	G	A	0.191819	-0.0210584	0.00262263	8.7e-17	0.00162196	0.000927362	0.08
rs61773666	1	11101435	G	A	0.270854	-0.0181541	0.00248337	9e-14	0.000516213	0.000877781	0.56
rs12136082	1	11102275	A	G	0.191797	-0.0210702	0.00262201	8e-17	0.00162308	0.000927119	0.08
1:11102453_TTGGATGGATGGATGGATGGA_T	1	11102453	TTGGATGGATGGATGGATGGA	T	0.219863	-0.020425	0.00251213	5.7e-17	0.000516726	0.000888799	0.56
rs910663	1	11103967	G	A	0.21275	-0.020807	0.00251979	1.5e-17	0.000794717	0.000891392	0.37
rs3765900	1	11104370	C	T	0.213006	-0.0208593	0.00251975	1.5e-17	0.000752481	0.000891394	0.4
rs3765901	1	11104676	G	A	0.214444	-0.0206482	0.00251549	2.4e-17	0.000756734	0.000890128	0.4
rs3819991	1	11104712	G	A	0.213614	-0.0207497	0.00251802	1.8e-17	0.000716638	0.000890791	0.42
rs9430347	1	11104845	T	C	0.192125	-0.0209036	0.00261993	1.2e-16	0.00160146	0.000926352	0.084
rs2273345	1	11105106	C	T	0.216511	-0.0204914	0.0025108	4.3e-17	0.00064644	0.000888276	0.47
rs2273344	1	11105122	C	T	0.193922	-0.0209507	0.00261434	1.2e-16	0.00146421	0.000924193	0.11
rs10779750	1	11106359	T	C	0.192924	-0.0212773	0.00262197	3.7e-17	0.00164817	0.000926996	0.075
rs7548659	1	11107439	G	T	0.207806	-0.0208973	0.00255331	1.7e-17	0.000812995	0.000904226	0.37
1:11111976_TGAA_T	1	11111976	TGAA	T	0.257218	-0.0210038	0.002386	1.6e-20	0.000846839	0.000842889	0.32
rs1884429	1	11112836	T	C	0.235461	-0.0207784	0.00243793	1.7e-19	0.00169384	0.00086062	0.049
rs2791642	1	11117536	A	T	0.211425	-0.0217914	0.00263963	2.1e-18	0.00103012	0.000932891	0.27
rs1211575	1	11118390	G	A	0.257294	-0.0208319	0.0023629	1.6e-20	0.000947001	0.000834674	0.26
rs743577	1	11119135	G	A	0.258696	-0.0203885	0.00235944	6.6e-20	0.000894301	0.000833442	0.28
rs2486922	1	11124885	T	C	0.257163	-0.020679	0.00236029	2.7e-20	0.000966813	0.000833702	0.25
rs56364984	1	11124911	C	CT	0.258525	-0.0210665	0.00238194	1.2e-20	0.000912908	0.000841287	0.28
rs55924558	1	11124912	C	T	0.256378	-0.0208976	0.00238208	2.2e-20	0.000847507	0.000841406	0.31
rs2486921	1	11124943	G	A	0.256959	-0.0209132	0.00238118	2e-20	0.000875772	0.000841069	0.3
rs2261317	1	11124979	A	G	0.257178	-0.0206782	0.00236015	2.7e-20	0.000969815	0.000833649	0.24
rs2486920	1	11125050	T	C	0.257162	-0.0206706	0.00236026	2.7e-20	0.000972353	0.000833692	0.24
rs774137930	1	11125727	TTTAG	T	0.234944	-0.0209872	0.00245657	8.1e-20	0.00167886	0.000867177	0.053
rs2039841	1	11125729	T	C	0.281138	-0.016712	0.00236714	1.1e-14	0.00151222	0.000835015	0.07
rs5019466	1	11125733	G	C	0.23437	-0.021007	0.00245521	8.8e-20	0.00164131	0.000866765	0.058
rs2039840	1	11125866	G	A	0.257178	-0.0206787	0.00236014	2.6e-20	0.000969606	0.000833646	0.24
rs2791661	1	11126399	C	T	0.257192	-0.020683	0.00236016	2.6e-20	0.000969211	0.000833658	0.24
rs2748880	1	11126432	C	G	0.257277	-0.0206839	0.00236006	2.5e-20	0.000953791	0.00083364	0.25
rs2748879	1	11126490	A	G	0.25731	-0.0206971	0.00236014	2.4e-20	0.000950932	0.000833665	0.25
rs2791660	1	11126517	C	T	0.257249	-0.020706	0.00236021	2.3e-20	0.000959627	0.000833679	0.25
rs2791659	1	11126569	C	A	0.257184	-0.0206936	0.00236012	2.5e-20	0.000967615	0.000833643	0.25
rs6701726	1	11126941	C	T	0.257094	-0.0206418	0.00236034	3.3e-20	0.000975945	0.00083372	0.24
rs6655938	1	11127315	C	T	0.256455	-0.0208776	0.00238215	2.6e-20	0.000863341	0.000841421	0.3
rs11121687	1	11127350	A	G	0.256388	-0.0209049	0.00238204	2.2e-20	0.000849985	0.000841392	0.31
rs11121688	1	11127422	C	G	0.256388	-0.0209051	0.00238204	2.2e-20	0.000850019	0.000841391	0.31
rs11576271	1	11127445	T	C	0.256388	-0.0209063	0.00238204	2.1e-20	0.000849923	0.000841391	0.31
rs34154272	1	11127495	G	GA	0.246823	-0.0205248	0.0024284	3e-19	0.00117909	0.000857445	0.17
rs12569242	1	11127511	A	C	0.251901	-0.0215932	0.00240242	2e-21	0.000774531	0.000848784	0.36
rs2261217	1	11127764	C	A	0.257179	-0.0206774	0.00236004	2.7e-20	0.00096588	0.00083361	0.25
rs2791658	1	11127871	A	G	0.257179	-0.0206774	0.00236004	2.7e-20	0.00096588	0.00083361	0.25
rs2791657	1	11128001	A	G	0.257183	-0.020677	0.00236002	2.7e-20	0.00096103	0.000833601	0.25
rs2791656	1	11128329	A	G	0.23608	-0.0203991	0.00242879	3.6e-19	0.00170037	0.0008576	0.047
rs2791655	1	11128654	G	A	0.281596	-0.0202884	0.00230068	3.7e-20	0.00076068	0.000811976	0.35
rs1194820	1	11129259	T	G	0.258089	-0.0206415	0.00235902	2.6e-20	0.000923019	0.00083332	0.27
rs2791654	1	11129317	G	A	0.294298	-0.0203085	0.00237369	7.2e-19	0.00140759	0.000837771	0.093
rs2748878	1	11129434	T	C	0.25852	-0.0206416	0.00236045	3.1e-20	0.000872376	0.000833711	0.3
rs2748877	1	11129437	T	C	0.258526	-0.0206402	0.00236045	3.1e-20	0.000870348	0.00083371	0.3
rs2791653	1	11129848	A	G	0.23575	-0.0205129	0.00242988	2.5e-19	0.00172814	0.00085795	0.044
rs910661	1	11130116	C	A	0.257365	-0.0206887	0.00235993	2.7e-20	0.000949521	0.000833598	0.25
rs1318348	1	11130418	A	G	0.257367	-0.0206893	0.00235994	2.7e-20	0.000949866	0.000833601	0.25
rs910660	1	11130643	A	G	0.257188	-0.0206748	0.00235989	2.7e-20	0.000961931	0.000833558	0.25
rs6540963	1	11131433	T	C	0.257191	-0.02067	0.00235988	2.7e-20	0.000960664	0.000833555	0.25
rs34741710	1	11131769	G	GC	0.256333	-0.020927	0.00238245	2e-20	0.000855689	0.000841538	0.31
rs751731164	1	11131923	CCAA	C	0.256458	-0.0207137	0.00238459	6e-20	0.000756782	0.000842433	0.37
rs1130683	1	11132217	G	A	0.257371	-0.0206888	0.00235957	2.4e-20	0.00100944	0.000833442	0.23
rs2791650	1	11132541	G	C	0.257317	-0.0206138	0.00235973	3.4e-20	0.00094817	0.0008335	0.26
rs2791649	1	11132561	A	G	0.257326	-0.0206097	0.0023597	3.5e-20	0.000946607	0.00083349	0.26
rs2791648	1	11132638	G	T	0.256893	-0.020823	0.00235982	1.5e-20	0.000998566	0.000833565	0.23
rs2791647	1	11132801	G	A	0.257414	-0.0206908	0.00235943	2.6e-20	0.000954768	0.000833427	0.25
rs7533211	1	11132965	G	C	0.257593	-0.0206924	0.00235881	2.6e-20	0.000971588	0.000833273	0.24
rs2791646	1	11133242	C	T	0.257136	-0.0206139	0.00236002	3.3e-20	0.000952914	0.000833628	0.25
rs2748876	1	11134157	T	G	0.235532	-0.0206268	0.00243046	1.9e-19	0.00173327	0.000858136	0.043
rs2259886	1	11137778	C	T	0.257689	-0.0206411	0.00235876	3.2e-20	0.000977012	0.000833263	0.24
rs12027609	1	11138469	T	G	0.256786	-0.0208514	0.00237998	2.4e-20	0.000895962	0.000840784	0.29
1:11140621_ACAC_A	1	11140621	ACAC	A	0.237737	-0.0203154	0.00245376	1.1e-18	0.00160122	0.000866269	0.065
1:11140625_AC_A	1	11140625	AC	A	0.237737	-0.0203154	0.00245376	1.1e-18	0.00160122	0.000866269	0.065
rs2258621	1	11141187	C	G	0.235763	-0.0207318	0.00243078	1.2e-19	0.00177185	0.000858235	0.039
1:11143619_CA_C	1	11143619	CA	C	0.480125	-0.0158679	0.00228184	1.6e-13	0.00128062	0.000803151	0.11
rs1148485	1	11148759	G	A	0.235527	-0.0205646	0.00243198	2.8e-19	0.00178069	0.000858577	0.038
1:11150053_CT_C	1	11150053	CT	C	0.262099	-0.0192255	0.00240319	6.7e-17	0.000936001	0.000848708	0.27
rs1148482	1	11151779	A	G	0.235013	-0.0204657	0.00243476	4.8e-19	0.00169983	0.000859557	0.048
rs2791644	1	11160674	C	T	0.235303	-0.0203663	0.00243349	6.7e-19	0.00155387	0.00085898	0.07
rs2486918	1	11164937	C	T	0.260143	-0.0210782	0.0023524	4.7e-21	0.00111301	0.000830752	0.18
rs6540964	1	11166302	C	T	0.259986	-0.0209859	0.0023524	6.3e-21	0.00111455	0.000830692	0.18
rs5772442	1	11170050	C	CA	0.405316	-0.0174126	0.00228092	1.9e-16	0.00118008	0.000803754	0.14
rs2261434	1	11170131	A	C	0.259875	-0.0210998	0.00235275	3.9e-21	0.00109653	0.000830848	0.19
rs2015818	1	11170743	G	A	0.260146	-0.0210555	0.0023527	4.9e-21	0.00111267	0.000830844	0.18
rs765885834	1	11171540	G	GA	0.291689	-0.018695	0.00236261	8.2e-17	0.00207528	0.000833086	0.013
rs1148480	1	11172006	A	G	0.259807	-0.0210413	0.00235307	5.4e-21	0.00109377	0.000830925	0.19
rs1148478	1	11174067	A	T	0.237572	-0.0210366	0.00242356	3.4e-20	0.00187593	0.000855186	0.028
rs755648694	1	11178425	CTAGGA	C	0.260233	-0.0210888	0.0023538	4.3e-21	0.0011208	0.000831199	0.18
rs56803472	1	11179484	C	T	0.762359	0.0208426	0.0024234	6.2e-20	-0.00188931	0.000855197	0.027
rs28729193	1	11180151	T	C	0.76217	0.02092	0.00242334	5.7e-20	-0.00186018	0.00085521	0.03
rs11121691	1	11181327	C	T	0.762481	0.0209961	0.00242374	3.6e-20	-0.00188561	0.000855262	0.027
1:11185789_GA_G	1	11185789	GA	G	0.774993	0.0202394	0.00258695	7.6e-17	-0.00131399	0.000910964	0.15
rs2275527	1	11190646	G	A	0.762471	0.0209184	0.00242337	4.9e-20	-0.0019064	0.000855169	0.026
rs1417131	1	11191922	T	C	0.763905	0.0209866	0.00243089	4.1e-20	-0.00198962	0.000857689	0.02
rs12097293	1	11197467	A	G	0.762643	0.020836	0.00242445	6.9e-20	-0.0019043	0.000855482	0.026
rs6701524	1	11198502	A	G	0.762216	0.0207222	0.00242338	1.1e-19	-0.00187661	0.000855185	0.028
rs12075896	1	11200350	C	A	0.762457	0.0209388	0.00242384	4.8e-20	-0.00188316	0.000855295	0.028
rs12239187	1	11202411	T	C	0.762539	0.0208847	0.00242413	5.6e-20	-0.00190055	0.000855321	0.026
rs1057079	1	11205058	C	T	0.260039	-0.0210195	0.00235294	5.1e-21	0.00114341	0.000830864	0.17
rs2791643	1	11207269	C	T	0.238228	-0.0208887	0.00242185	4.4e-20	0.00187229	0.000854728	0.028
rs11581010	1	11212458	A	G	0.762778	0.0207166	0.00242502	1.3e-19	-0.00185765	0.000855548	0.03
rs75077113	1	11214582	A	C	0.720683	0.0204864	0.00233016	2.1e-20	-0.00156835	0.000822218	0.056
rs77270747	1	11214584	A	C	0.757218	0.0208667	0.00246038	1.9e-19	-0.00171932	0.00086908	0.048
rs6691831	1	11220180	A	G	0.745964	0.0201242	0.00238336	9e-19	-0.00118179	0.000841342	0.16
rs12089366	1	11220187	C	T	0.775264	0.0209181	0.00249356	7.3e-19	-0.00185025	0.00087969	0.035
rs7553827	1	11222393	T	C	0.762935	0.0207605	0.00242809	8.8e-20	-0.00190929	0.000856942	0.026
rs4240892	1	11227864	C	T	0.260071	-0.0209496	0.00235254	7.2e-21	0.00110598	0.000830752	0.18
rs11121695	1	11229515	G	A	0.762424	0.0208805	0.00242397	6.2e-20	-0.00189653	0.000855287	0.027
rs4845852	1	11233559	C	T	0.26005	-0.0210203	0.00235276	5.4e-21	0.00110595	0.00083082	0.18
rs11585553	1	11233814	G	A	0.76294	0.0208026	0.00242537	9.6e-20	-0.00182763	0.00085566	0.033
rs10864490	1	11236410	C	A	0.761923	0.0209306	0.00242173	5.2e-20	-0.00188755	0.000854777	0.027
rs12041740	1	11236524	G	A	0.260023	-0.0209535	0.0023525	7.3e-21	0.00109344	0.000830732	0.19
rs11121696	1	11238063	T	C	0.762554	0.0208773	0.0024239	6.4e-20	-0.00187678	0.000855245	0.028
rs6674994	1	11239515	T	C	0.25988	-0.020926	0.002353	7.6e-21	0.00105313	0.000830908	0.2
rs4845853	1	11243470	A	G	0.260018	-0.0209547	0.00235244	7.4e-21	0.00109864	0.000830712	0.19
1:11245470_CA_C	1	11245470	CA	C	0.762999	0.0210671	0.00243107	3.7e-20	-0.00194471	0.000858049	0.023
rs1034528	1	11249132	G	C	0.74083	0.0208213	0.00235572	1.7e-20	-0.00111265	0.000831571	0.18
rs1205593	1	11252716	T	C	0.240674	-0.020488	0.00241719	2.5e-19	0.00175962	0.000852873	0.039
1:11252805_TA_T	1	11252805	TA	T	0.266276	-0.018051	0.00238706	5.1e-16	0.00163751	0.000841952	0.052
1:11254006_AC_A	1	11254006	AC	A	0.219282	-0.020347	0.00253569	1e-17	0.00180142	0.000894014	0.044
rs4845854	1	11261929	T	C	0.290509	-0.0202342	0.00227412	3.9e-21	0.000929187	0.000802386	0.25
rs12120734	1	11262020	A	G	0.290926	-0.0201882	0.00227314	4.7e-21	0.000950207	0.000802167	0.24
rs4845855	1	11262310	T	C	0.268222	-0.0198659	0.00232998	8.7e-20	0.00161128	0.000821679	0.05
rs70977552	1	11262972	C	CA	0.290788	-0.0203143	0.00227437	3e-21	0.000935447	0.000802654	0.24
1:11264033_CA_C	1	11264033	CA	C	0.26954	-0.0199288	0.00232661	5.1e-20	0.00165505	0.000820852	0.044
rs2300095	1	11265717	A	G	0.293475	-0.0166737	0.00227736	2.7e-15	0.00155524	0.000802797	0.053
rs2253213	1	11265785	A	G	0.268575	-0.019795	0.00232935	9.9e-20	0.00165466	0.000821373	0.044
rs2300094	1	11266044	C	T	0.29566	-0.0198805	0.00226995	1.8e-20	0.000988352	0.000801168	0.22
rs2300093	1	11266392	G	C	0.29113	-0.020139	0.00227234	5.7e-21	0.000957669	0.00080193	0.23
rs2300092	1	11266464	T	C	0.29103	-0.0201986	0.00227287	4.5e-21	0.000956288	0.000802111	0.23
rs2300091	1	11266711	C	T	0.291164	-0.0201368	0.00227234	6e-21	0.000949904	0.000801924	0.24
rs11121698	1	11267283	C	T	0.291127	-0.0201406	0.00227235	5.7e-21	0.000955623	0.000801934	0.23
1:11267654_CT_C	1	11267654	CT	C	0.316819	-0.0165546	0.00229812	2.5e-14	0.00172695	0.000809745	0.033
rs1010447	1	11269796	T	C	0.269274	-0.019812	0.00232688	7.8e-20	0.00163808	0.000820754	0.046
rs2016559	1	11269917	G	T	0.269261	-0.019801	0.00232687	8.1e-20	0.00164083	0.000820748	0.046
rs2335398	1	11270171	C	T	0.291133	-0.0201495	0.00227235	5.5e-21	0.000956153	0.000801933	0.23
rs4845982	1	11271576	T	C	0.269254	-0.0198066	0.00232687	7.9e-20	0.00164306	0.000820745	0.045
rs742824	1	11274022	G	A	0.291135	-0.0201445	0.00227233	5.8e-21	0.000953833	0.000801926	0.23
rs4845856	1	11274547	T	C	0.291129	-0.0201429	0.00227235	5.8e-21	0.000956119	0.000801931	0.23
rs2746637	1	11275588	A	G	0.269195	-0.0197842	0.00232716	9.7e-20	0.00164707	0.000820829	0.045
1:11276710_TA_T	1	11276710	TA	T	0.317967	-0.0183965	0.00230139	4.7e-17	0.000171966	0.000811429	0.83
rs2746638	1	11278125	T	C	0.269467	-0.0196641	0.00232684	1.4e-19	0.00165835	0.000820715	0.043
rs7526649	1	11278163	C	T	0.269602	-0.0197156	0.00232649	1.1e-19	0.00166191	0.000820633	0.043
rs7540890	1	11278289	T	C	0.2682	-0.0197146	0.00232997	1.5e-19	0.00160993	0.000821582	0.05
rs7549109	1	11278813	G	C	0.291129	-0.020154	0.00227233	5.5e-21	0.00095517	0.000801925	0.23
rs12031403	1	11280103	G	A	0.267615	-0.0200564	0.00234324	4.5e-20	0.001789	0.000826728	0.03
rs758459100	1	11281051	GT	G	0.287913	-0.0199595	0.00229949	2.7e-20	0.00111853	0.000811233	0.17
rs368107658	1	11283386	G	GT	0.29097	-0.0202579	0.00227377	4.1e-21	0.000965324	0.000802421	0.23
rs200093392	1	11283389	TTA	T	0.29097	-0.0202579	0.00227377	4.1e-21	0.000965324	0.000802421	0.23
rs7543400	1	11283964	C	G	0.291128	-0.0201525	0.00227232	5.5e-21	0.000955558	0.000801923	0.23
rs12730522	1	11284091	G	A	0.291131	-0.0201475	0.00227231	5.6e-21	0.000954319	0.000801921	0.23
rs10779751	1	11284336	A	G	0.269257	-0.019828	0.00232695	7.7e-20	0.00164426	0.000820779	0.045
rs367750130	1	11285479	CTT	C	0.266885	-0.0195836	0.00234052	4.5e-19	0.00146686	0.000825411	0.076
rs4845984	1	11285574	A	G	0.26927	-0.0198248	0.00232678	7.6e-20	0.00164253	0.000820723	0.045
rs4845857	1	11285680	T	C	0.269609	-0.019853	0.00232574	6.9e-20	0.00165283	0.000820536	0.044
rs12124983	1	11286178	T	C	0.291134	-0.0201634	0.00227227	5.3e-21	0.000956605	0.000801905	0.23
rs12029823	1	11286745	T	C	0.26928	-0.0198286	0.00232669	7.8e-20	0.00164152	0.000820704	0.045
rs12032364	1	11286872	G	T	0.2693	-0.0198239	0.00232689	7.7e-20	0.00164423	0.000820781	0.045
rs12739368	1	11288247	T	C	0.269248	-0.0198081	0.0023268	8.4e-20	0.00163413	0.000820722	0.046
rs12752896	1	11288348	G	C	0.269629	-0.0198622	0.00232565	6.7e-20	0.00165479	0.000820501	0.044
rs4845985	1	11288618	G	A	0.269482	-0.0197916	0.00232643	8.1e-20	0.00168712	0.000820792	0.04
rs4845986	1	11288633	G	C	0.269489	-0.0197969	0.00232641	8e-20	0.0016864	0.000820784	0.04
rs1064261	1	11288758	G	A	0.26944	-0.0198215	0.00232683	8e-20	0.00165051	0.000820738	0.044
rs2076655	1	11289161	G	A	0.290796	-0.02032	0.00227301	3.1e-21	0.000993945	0.000802164	0.22
rs2788570	1	11289466	T	C	0.213719	-0.0181822	0.00257927	3.4e-14	0.000668173	0.000908252	0.46
1:11290178_TA_T	1	11290178	TA	T	0.265277	-0.020106	0.00235712	6.9e-20	0.00170644	0.00083122	0.04
rs2300089	1	11290341	C	G	0.269726	-0.0199023	0.00232541	6.1e-20	0.00163309	0.000820419	0.047
rs10864495	1	11292666	T	A	0.291258	-0.0202076	0.00227207	4.8e-21	0.000934513	0.000801838	0.24
rs2024625	1	11292753	A	G	0.269377	-0.0198687	0.00232641	7.1e-20	0.00162114	0.000820596	0.048
rs2746639	1	11292881	A	G	0.268948	-0.0199099	0.00232787	7.2e-20	0.00162058	0.000820983	0.048
rs2746640	1	11292952	T	A	0.27239	-0.0191444	0.00232241	1.1e-18	0.00158156	0.000819026	0.053
rs11121702	1	11293147	C	T	0.269374	-0.0198651	0.00232644	7.2e-20	0.00162097	0.000820606	0.048
rs7541998	1	11293200	C	T	0.269373	-0.0198673	0.00232645	7.1e-20	0.00162013	0.000820608	0.048
rs11121703	1	11293792	A	C	0.269722	-0.0199062	0.00232534	6.1e-20	0.00163505	0.000820399	0.046
rs11121704	1	11293959	C	T	0.269367	-0.019857	0.00232644	7.2e-20	0.00162196	0.000820597	0.048
rs718206	1	11294474	T	A	0.269378	-0.0198691	0.00232641	7.1e-20	0.00162126	0.000820594	0.048
rs1883964	1	11294942	T	A	0.269357	-0.0198514	0.00232643	7.3e-20	0.00162004	0.000820596	0.048
rs1212929	1	11295868	A	G	0.268191	-0.0198067	0.0023299	1.2e-19	0.00157572	0.000821487	0.055
rs7524202	1	11297762	T	C	0.269354	-0.0198517	0.0023264	7.3e-20	0.00161918	0.000820587	0.048
rs2024627	1	11298790	T	C	0.269354	-0.0198517	0.0023264	7.3e-20	0.00161923	0.000820587	0.048
rs35144517	1	11298823	C	CT	0.421589	-0.0172079	0.00229524	2.1e-15	0.00129245	0.000808498	0.11
rs7544489	1	11299511	C	T	0.291239	-0.0201873	0.00227193	5.3e-21	0.000935238	0.000801789	0.24
rs6661859	1	11301063	T	C	0.269714	-0.019897	0.00232531	6.3e-20	0.00163326	0.000820388	0.046
rs6697896	1	11301196	C	G	0.269354	-0.0198522	0.00232639	7.3e-20	0.00161937	0.000820584	0.048
rs1135172	1	11301714	A	G	0.269713	-0.0198986	0.00232531	6.3e-20	0.00163363	0.000820388	0.046
rs11121706	1	11302065	G	A	0.269737	-0.0199015	0.00232538	6.2e-20	0.00163102	0.000820413	0.047
rs12036364	1	11304242	A	G	0.26937	-0.0198598	0.00232636	7.3e-20	0.00161951	0.00082058	0.048
rs6683420	1	11304306	G	A	0.269716	-0.0199009	0.0023253	6.3e-20	0.00163363	0.000820386	0.046
rs6672513	1	11304583	A	G	0.26937	-0.0198602	0.00232636	7.3e-20	0.00161967	0.00082058	0.048
rs4845858	1	11304720	C	T	0.291236	-0.0201969	0.0022719	5.1e-21	0.000937664	0.000801783	0.24
rs4845859	1	11304873	A	G	0.269375	-0.0198623	0.00232639	7.3e-20	0.00162031	0.000820589	0.048
rs6686835	1	11305316	G	A	0.269717	-0.0198995	0.0023253	6.3e-20	0.00163291	0.000820384	0.047
rs1205592	1	11305663	C	T	0.268699	-0.019821	0.00232832	9.9e-20	0.00163151	0.000821083	0.047
rs4845987	1	11306279	G	C	0.291236	-0.0202188	0.00227203	4.6e-21	0.000942103	0.000801825	0.24
rs35477451	1	11306661	T	TG	0.269163	-0.0199264	0.00232776	6.3e-20	0.00162385	0.000821095	0.048
rs6679878	1	11306882	A	G	0.269369	-0.0198247	0.00232629	8.2e-20	0.00163349	0.000820544	0.047
rs11121708	1	11307253	G	C	0.269368	-0.0198642	0.00232636	7.2e-20	0.00162083	0.000820579	0.048
rs6670821	1	11308762	T	C	0.269425	-0.0198364	0.00232631	8.1e-20	0.00161751	0.000820582	0.049
rs113155158	1	11309985	A	G	0.289081	-0.0199473	0.0023034	5.7e-20	0.00125752	0.000812339	0.12
rs551112099	1	11310284	A	AC	0.294926	-0.0202063	0.0022732	5.9e-21	0.00101394	0.000802145	0.21
1:11310675_CT_C	1	11310675	CT	C	0.269677	-0.0199072	0.00232588	6.5e-20	0.00165312	0.000820587	0.044
rs35501739	1	11311217	G	GC	0.269472	-0.0199603	0.00232726	5.3e-20	0.0016266	0.000821099	0.048
rs11121710	1	11313244	T	C	0.269516	-0.0198449	0.00232624	8.3e-20	0.00160166	0.000820578	0.051
rs5772446	1	11314657	T	TA	0.268246	-0.0201112	0.00233024	2.8e-20	0.00168511	0.000822174	0.04
1:11315439_CAAAAAAAAAAA_C	1	11315439	CAAAAAAAAAAA	C	0.149928	-0.0188226	0.00295038	4.9e-12	0.00151533	0.00104131	0.15
rs10864496	1	11315706	G	A	0.291297	-0.0201766	0.00227194	5.8e-21	0.000933786	0.000801794	0.24
rs2092642	1	11317320	C	T	0.291251	-0.0201969	0.00227214	5.5e-21	0.000928801	0.000801859	0.25
rs11121711	1	11317661	A	T	0.268413	-0.0199544	0.00232926	5e-20	0.00165209	0.000821838	0.044
rs7554251	1	11317932	T	C	0.26809	-0.019921	0.00233033	5.8e-20	0.00165172	0.00082203	0.045
rs7517041	1	11317977	G	C	0.291329	-0.0201807	0.00227198	5.8e-21	0.000944495	0.000801805	0.24
rs7525957	1	11318236	C	T	0.268413	-0.0199545	0.00232926	5e-20	0.00165219	0.000821839	0.044
rs2076657	1	11318763	C	G	0.291301	-0.0201738	0.00227203	5.9e-21	0.000922718	0.000801823	0.25
rs4845988	1	11319587	A	G	0.291282	-0.0201955	0.00227214	5.1e-21	0.000938457	0.000801861	0.24
rs11121712	1	11320329	G	C	0.291294	-0.0201424	0.00227205	6.5e-21	0.000922099	0.000801837	0.25
rs11121713	1	11320350	G	A	0.291287	-0.0201504	0.00227211	6.6e-21	0.000922407	0.000801846	0.25
rs35365679	1	11320776	C	CT	0.2704	-0.0198432	0.00233073	8.5e-20	0.0015516	0.000822312	0.059
rs1883965	1	11322156	A	G	0.282578	-0.018737	0.00229561	8.2e-19	0.00160512	0.000809511	0.047
rs2295079	1	11322565	C	G	0.305907	-0.0191881	0.0022429	5.4e-20	0.000939534	0.000791269	0.24
rs2295080	1	11322628	G	T	0.305911	-0.0191876	0.00224292	5.4e-20	0.000938642	0.000791276	0.24
rs7542591	1	11323901	C	G	0.30544	-0.019076	0.00224681	9.6e-20	0.000971929	0.000792585	0.22
1:11324142_CAAA_C	1	11324142	CAAA	C	0.307686	-0.0145288	0.00230316	1.9e-11	0.00040982	0.000810601	0.61
rs4845860	1	11324193	A	G	0.282026	-0.0186312	0.00230059	1.4e-18	0.00168019	0.000811226	0.038
rs71568318	1	11324920	C	CAAATAAATAAATAAATAAATAAAT	0.324354	-0.015451	0.00221942	6.6e-14	0.00150594	0.000782166	0.054
1:11325294_CA_C	1	11325294	CA	C	0.255359	-0.0189305	0.00242481	3.8e-17	0.00133414	0.000854908	0.12
1:11325307_TTA_T	1	11325307	TTA	T	0.255306	-0.0189347	0.00242523	3.9e-17	0.00133297	0.000855054	0.12
rs7517155	1	11325330	T	A	0.315146	-0.0187534	0.00224347	4.9e-19	0.000963746	0.000791167	0.22
rs6540965	1	11325521	G	C	0.333994	-0.0144797	0.00219262	7.8e-13	0.00149999	0.000772769	0.052
rs6671083	1	11325910	G	A	0.334045	-0.0144257	0.0021924	9.7e-13	0.00151396	0.000772673	0.05
rs1074078	1	11326788	C	T	0.667143	0.0143061	0.00219096	1.7e-12	-0.00143741	0.000772097	0.063
rs3010222	1	11326922	T	C	0.666456	0.0146122	0.00219083	5.9e-13	-0.00151423	0.000772069	0.05
rs2788546	1	11337559	C	T	0.686967	0.0160002	0.00225094	3.4e-14	-0.00032741	0.000793905	0.68
rs2788543	1	11344629	T	C	0.705806	0.0187237	0.00227867	1.8e-17	-0.000249314	0.000803965	0.76
rs35865444	1	11347155	C	CTGTT	0.690341	0.0172624	0.00224919	1.1e-15	-0.000223717	0.000793122	0.78
rs145484674	1	11351498	C	CTACAAAAA	0.73593	0.0151068	0.00236513	1.3e-11	-0.000956547	0.000833988	0.25
rs2744815	1	11360957	A	G	0.688905	0.0161193	0.0022293	3.9e-14	-0.000216879	0.000786377	0.78
rs2744820	1	11365015	G	A	0.701175	0.01553	0.00226087	3.2e-13	-0.000179755	0.00079735	0.82
rs2982372	1	11372913	T	C	0.751158	0.0139569	0.00238662	5.8e-10	-0.000991115	0.000841468	0.24
rs2982373	1	11377114	G	A	0.706639	0.0128307	0.00231728	4e-09	-0.000868154	0.000816222	0.29
rs2744822	1	11378544	G	T	0.666946	0.0145932	0.00226497	2.7e-11	-0.000523839	0.000798065	0.51
rs2744824	1	11385648	T	A	0.639364	0.0136975	0.00226895	2e-10	0.00046109	0.000798838	0.56
rs2744825	1	11386625	A	G	0.640591	0.0130703	0.0022843	1.4e-09	0.000625306	0.000804161	0.44
rs867321	1	16087164	C	T	0.88136	-0.0265585	0.00319992	1.1e-15	0.00267708	0.00113169	0.018
rs938295	1	16087260	C	T	0.833294	-0.029387	0.00278412	6.1e-25	0.00260094	0.000985392	0.0083
rs12081206	1	16087731	G	C	0.833388	-0.029312	0.00278507	8.1e-25	0.00261346	0.000985755	0.008
rs12091731	1	16087824	C	T	0.833841	-0.0292269	0.00278795	1.2e-24	0.00259154	0.000986774	0.0086
1:16088755_GTTTT_G	1	16088755	GTTTT	G	0.712878	-0.0150586	0.00230941	6e-10	0.000690054	0.000814115	0.4
rs4375263	1	16089015	A	C	0.728551	-0.0167988	0.00233096	8.6e-12	0.0009103	0.000822261	0.27
rs4375264	1	16089024	A	G	0.730731	-0.0172652	0.00233491	2.5e-12	0.00080722	0.000823696	0.33
rs12083988	1	16089356	G	A	0.730928	-0.0172853	0.0023347	2.5e-12	0.00088723	0.000823521	0.28
rs77177531	1	16089909	C	T	0.733913	-0.0168183	0.00234171	9.8e-12	0.000831934	0.000825812	0.31
rs74461452	1	16089955	A	G	0.733852	-0.016883	0.00234167	7.8e-12	0.000831573	0.00082581	0.31
rs34399236	1	16090237	C	T	0.727336	-0.0164675	0.00232269	2.1e-11	0.000820268	0.000818847	0.32
rs6429774	1	16090898	G	A	0.727305	-0.0165829	0.00232242	1.5e-11	0.000769981	0.000818773	0.35
rs6429776	1	16091074	A	G	0.725298	-0.0164203	0.00231799	2.6e-11	0.000808377	0.000817462	0.32
rs904912	1	16093560	T	A	0.270446	0.0166069	0.00232697	1.4e-11	-0.000817994	0.000820891	0.32
rs2271545	1	16095316	C	T	0.272953	0.0167059	0.00231575	7.4e-12	-0.000845266	0.000817099	0.3
rs7368383	1	16096256	T	C	0.271369	0.0169107	0.00231878	4.4e-12	-0.000792568	0.000817922	0.33
rs10927851	1	16096934	C	T	0.273005	0.0168193	0.00231401	5.1e-12	-0.000833544	0.000816536	0.31
rs7513439	1	16097511	T	A	0.274171	0.0167851	0.00231255	4.6e-12	-0.000838608	0.000816017	0.3
rs7544506	1	16097513	C	A	0.274178	0.0167988	0.00231247	4.4e-12	-0.000839802	0.000815991	0.3
1:16097744_GT_G	1	16097744	GT	G	0.222948	0.0177531	0.00262004	1.4e-10	-0.000525319	0.000924748	0.57
rs10927852	1	16098866	A	G	0.270805	0.0166061	0.00232394	1.1e-11	-0.000755336	0.000819806	0.36
rs12045331	1	16100044	G	A	0.281809	0.0162761	0.00229848	3.8e-11	-0.000589885	0.000810682	0.47
rs546575260	1	16100176	GA	G	0.317225	0.014735	0.00232994	1e-09	-0.000648871	0.00082113	0.43
rs36049243	1	16100763	T	TG	0.281079	0.0165797	0.00230744	1.6e-11	-0.000659263	0.000813829	0.42
rs12730950	1	16102124	A	C	0.271201	0.0162708	0.00232566	3.2e-11	-0.000653024	0.000820597	0.43
rs569078955	1	16103182	A	AC	0.119219	0.0258119	0.00319781	6.6e-15	-0.00242017	0.00113232	0.033
rs12043036	1	16103218	G	A	0.281437	0.0165863	0.00230118	1.4e-11	-0.000588785	0.00081167	0.47
1:16105140_CT_C	1	16105140	CT	C	0.110246	0.0266412	0.00337311	2.8e-14	-0.00242391	0.00119447	0.042
1:16108030_AAAAAT_A	1	16108030	AAAAAT	A	0.119343	0.0256452	0.00318534	7.2e-15	-0.00228886	0.00112832	0.043
rs35254883	1	16108380	A	AT	0.11976	0.025415	0.00318414	1.2e-14	-0.00227656	0.00112788	0.044
rs36050598	1	16109305	C	CT	0.143365	0.0249629	0.00366338	3.1e-10	-0.00175318	0.00130361	0.18
rs10737910	1	16109669	C	T	0.119482	0.0255851	0.0031793	7.3e-15	-0.00228184	0.00112618	0.043
rs111685220	1	16111833	A	AAAAAT	0.12152	0.0254396	0.00317846	8e-15	-0.00217646	0.00112584	0.053
rs2546	1	16113037	C	T	0.880862	-0.0257338	0.00319158	7.4e-15	0.00222031	0.00113043	0.05
rs35688687	1	16113912	A	AACAC	0.116959	0.0258965	0.0032401	1.7e-14	-0.00239661	0.00114733	0.037
rs386628850	1	16113913	A	ACACT	0.121697	0.0255219	0.00318698	6.6e-15	-0.00233316	0.00112886	0.039
rs2862159	1	16115759	T	A	0.121115	0.0260902	0.00319195	2.3e-15	-0.00205488	0.00113089	0.069
rs2862160	1	16115760	A	T	0.119823	0.0259556	0.0031964	4.8e-15	-0.0022269	0.00113249	0.049
rs2862161	1	16115970	G	A	0.119311	0.0259366	0.00319417	5.2e-15	-0.00215915	0.00113171	0.056
rs7537594	1	16116195	A	G	0.207461	0.0164559	0.00258793	3.7e-09	-0.000813104	0.000914825	0.37
rs4661650	1	16116889	C	G	0.119355	0.0259019	0.00319494	5.7e-15	-0.00215393	0.00113191	0.057
rs4661652	1	16117023	T	C	0.119893	0.026042	0.00319875	4.1e-15	-0.00222204	0.00113331	0.05
rs6701487	1	16117922	G	C	0.119346	0.0259777	0.00319677	5e-15	-0.00213716	0.00113263	0.059
rs4661653	1	16118173	T	C	0.119241	0.0259876	0.00319938	5.1e-15	-0.00213429	0.00113363	0.06
rs4661337	1	16118218	C	T	0.119348	0.0259692	0.00319719	5e-15	-0.0021372	0.00113278	0.059
rs7552462	1	16120051	T	C	0.119639	0.0257646	0.00319777	8e-15	-0.00211458	0.00113295	0.062
rs34758372	1	16120195	C	CA	0.282036	0.0151554	0.00248	3e-09	-0.0026068	0.000873872	0.0029
rs6429780	1	16121661	T	C	0.119502	0.0256913	0.00320051	9.3e-15	-0.00210748	0.00113393	0.063
rs2062594	1	16124985	T	C	0.118662	0.0267406	0.00326715	4.5e-15	-0.00187268	0.00115668	0.11
rs1000997	1	16125961	G	A	0.285976	0.0156196	0.00236046	6.6e-10	-0.00146286	0.000832097	0.079
rs75656779	1	16128444	G	A	0.941213	-0.0276377	0.00450414	2.8e-10	-1.20069e-05	0.00158113	0.99
rs12738340	1	16133396	C	A	0.101827	0.0374813	0.00342865	7.3e-28	-0.00207025	0.00120458	0.086
rs4661654	1	16136108	A	G	0.101755	0.0374686	0.00342952	7.3e-28	-0.00203568	0.00120494	0.091
rs150585957	1	16141642	C	T	0.988952	-0.0609902	0.0100797	1.5e-09	0.00354332	0.0034982	0.31
rs6429781	1	16144174	C	A	0.102131	0.0372959	0.00341904	8.5e-28	-0.00205766	0.00120159	0.087
1:16150337_GTTTTTTTTTTTT_G	1	16150337	GTTTTTTTTTTTT	G	0.0369046	0.0400716	0.00593505	1.5e-11	-0.0023523	0.00208935	0.26
rs10458447	1	16151833	A	G	0.101922	0.0374372	0.00341904	5.4e-28	-0.00207639	0.00120111	0.084
1:16152510_GT_G	1	16152510	GT	G	0.252397	0.016598	0.00255935	8.1e-11	-0.000788289	0.00090109	0.38
rs9728729	1	16152916	T	C	0.155351	0.0267769	0.00305884	1.8e-18	-0.0018444	0.00107515	0.086
rs28370336	1	16154643	C	A	0.318126	0.0181237	0.00237155	1e-14	-0.00160366	0.000835178	0.055
rs10927860	1	16155107	G	C	0.155577	0.0265091	0.00305502	3.7e-18	-0.00186371	0.00107402	0.083
rs10927861	1	16155439	G	A	0.10345	0.0369615	0.00341175	1.6e-27	-0.00195377	0.00119857	0.1
rs2202045	1	16156406	T	C	0.101905	0.0373447	0.00341892	6.5e-28	-0.0020781	0.0012011	0.084
rs6689074	1	16157218	T	C	0.101932	0.0373895	0.00341763	5.5e-28	-0.0020816	0.00120059	0.083
rs12568613	1	16159790	C	A	0.101942	0.0374754	0.0034169	4.1e-28	-0.00207939	0.00120032	0.083
rs6688051	1	16161530	C	G	0.101958	0.0374695	0.00341579	4e-28	-0.00208164	0.00119992	0.083
rs7542781	1	16163820	A	T	0.101983	0.0374926	0.00341372	3.2e-28	-0.00208184	0.00119918	0.083
rs1976400	1	16164154	C	A	0.101983	0.0374917	0.00341363	3.2e-28	-0.00208194	0.00119915	0.083
rs1969065	1	16165043	C	T	0.101986	0.0374924	0.00341335	3.2e-28	-0.00208241	0.00119905	0.082
rs113719584	1	16165203	G	A	0.988396	-0.0595428	0.00976008	3.3e-09	0.00319263	0.00341354	0.35
rs76732757	1	16165610	T	C	0.972919	-0.0501408	0.00638131	9.6e-16	0.0042566	0.00224742	0.058
rs142840572	1	16171353	CT	C	0.187635	0.0192919	0.00282303	5.3e-12	-0.00106474	0.00099184	0.28
rs61782190	1	16175391	A	C	0.892991	-0.0386045	0.00333959	5.1e-31	0.00234481	0.00117623	0.046
1:16176895_GT_G	1	16176895	GT	G	0.16143	0.0309985	0.00315248	1.5e-22	-0.001428	0.00111139	0.2
rs2062592	1	16177009	G	A	0.107058	0.0386669	0.00333901	4e-31	-0.00235256	0.00117608	0.045
rs988116	1	16177578	G	A	0.107438	0.0382589	0.00333529	1.7e-30	-0.00227963	0.00117478	0.052
rs10803402	1	16181979	T	C	0.102039	0.0375708	0.00341017	2.3e-28	-0.00211148	0.00119795	0.078
rs201960578	1	16182484	A	AC	0.102651	0.0376356	0.00340681	1.1e-28	-0.0020186	0.00119691	0.092
rs4661344	1	16182813	A	G	0.102099	0.0375486	0.00340968	2.4e-28	-0.00208282	0.00119783	0.082
rs34220792	1	16184747	C	CA	0.168231	0.0260268	0.0028994	6.9e-20	-0.00136226	0.00101847	0.18
rs34623941	1	16185635	G	GTT	0.334216	0.0136077	0.00224961	1.5e-09	-0.00120031	0.000792464	0.13
rs10803403	1	16186437	T	C	0.102129	0.0376067	0.00341016	2.1e-28	-0.00203819	0.00119794	0.089
rs7540404	1	16187760	A	G	0.102037	0.0375756	0.0034102	2.3e-28	-0.00211003	0.00119795	0.078
rs6701290	1	16188681	G	A	0.107018	0.0386526	0.00333917	4.2e-31	-0.00236854	0.00117607	0.044
rs6695698	1	16189061	T	C	0.102037	0.0375761	0.0034102	2.3e-28	-0.00211024	0.00119795	0.078
1:16190662_CTTTTTTTTT_C	1	16190662	CTTTTTTTTT	C	0.073995	0.0383768	0.00417274	9.2e-20	-0.00221511	0.00146256	0.13
1:16190673_TTTTTTTTTG_T	1	16190673	TTTTTTTTTG	T	0.173876	0.0304574	0.00305434	5.9e-23	-0.00161796	0.00107423	0.13
rs10803404	1	16191759	A	G	0.102038	0.0375738	0.0034102	2.3e-28	-0.00211183	0.00119795	0.078
rs10927870	1	16192394	A	G	0.102019	0.0376006	0.00341044	2.1e-28	-0.00209307	0.00119802	0.081
rs9782984	1	16199051	T	C	0.10085	0.0376	0.0034393	5.9e-28	-0.00212111	0.00120817	0.079
rs149984757	1	16201775	T	TTTTAA	0.102268	0.0376613	0.0034104	1.7e-28	-0.00210749	0.00119805	0.079
rs6665768	1	16205102	T	C	0.107017	0.0386768	0.00333918	3.9e-31	-0.00237979	0.00117606	0.043
rs2862747	1	16208604	T	C	0.102145	0.03741	0.00340929	4.2e-28	-0.00207229	0.00119775	0.084
rs2862748	1	16208633	T	A	0.102063	0.0377024	0.00340991	1.6e-28	-0.00212131	0.00119781	0.077
rs200190011	1	16208842	G	GC	0.954643	-0.0292561	0.00508067	1.4e-09	-0.000197197	0.00178295	0.91
rs6429786	1	16210373	C	T	0.107009	0.0386843	0.00333931	3.9e-31	-0.00237443	0.0011761	0.043
1:16211234_CT_C	1	16211234	CT	C	0.100656	0.0384977	0.00348029	2.2e-28	-0.00197762	0.00122284	0.11
rs594906	1	16211277	A	G	0.102031	0.037563	0.00341017	2.5e-28	-0.00209323	0.001198	0.081
rs612136	1	16213513	G	A	0.897948	-0.0375129	0.0034099	2.9e-28	0.00210212	0.00119792	0.079
rs643373	1	16215919	C	T	0.897957	-0.0375392	0.00341014	2.7e-28	0.00207256	0.0011979	0.084
rs2492596	1	16218189	T	C	0.897962	-0.0375608	0.00341017	2.4e-28	0.00210152	0.00119792	0.079
rs568287762	1	16218401	T	A	0.971966	-0.0559801	0.00740152	3.7e-13	0.00279433	0.00260539	0.28
rs570917029	1	16218401	T	TA	0.880465	-0.0341526	0.00329811	6.3e-26	0.0019037	0.00115856	0.1
rs471828	1	16221030	T	G	0.898177	-0.0374282	0.00341487	4.3e-28	0.0020653	0.00119956	0.085
rs616690	1	16222342	T	A	0.897972	-0.0376016	0.00341021	2.2e-28	0.00209404	0.00119792	0.08
rs556290	1	16223331	C	T	0.892994	-0.0386328	0.00333929	4.6e-31	0.00236565	0.00117606	0.044
rs57504066	1	16225728	C	T	0.925574	-0.030717	0.00394367	1.1e-14	0.00113802	0.00138437	0.41
rs12079958	1	16226873	G	A	0.897957	-0.0375726	0.00340997	2.4e-28	0.00210248	0.00119783	0.079
rs12077944	1	16228007	T	C	0.892976	-0.038617	0.00333902	5e-31	0.00236215	0.00117596	0.045
rs12406344	1	16228852	A	C	0.897959	-0.0375505	0.00340999	2.6e-28	0.0021088	0.00119783	0.078
rs12406632	1	16228913	T	C	0.897959	-0.0375509	0.00340998	2.6e-28	0.00210878	0.00119783	0.078
rs35401929	1	16228959	T	TA	0.893008	-0.0386145	0.00333953	4.8e-31	0.00235436	0.00117617	0.045
rs12078572	1	16229597	A	T	0.89796	-0.0375511	0.00340998	2.6e-28	0.00210858	0.00119783	0.078
rs60686777	1	16230062	G	A	0.897773	-0.0374786	0.00340734	3e-28	0.00208884	0.0011974	0.081
rs6429787	1	16230657	T	C	0.892976	-0.0386139	0.00333898	5e-31	0.00236517	0.00117595	0.044
1:16231143_AT_A	1	16231143	AT	A	0.839551	-0.0279818	0.00293268	2.2e-21	0.00328937	0.00103257	0.0014
rs61782232	1	16232634	C	T	0.925161	-0.0297515	0.00393109	4.1e-14	0.0012777	0.00137892	0.35
1:16242401_AT_A	1	16242401	AT	A	0.896624	-0.0374469	0.00339892	3.5e-28	0.00220523	0.00119391	0.065
rs12063905	1	16242620	C	A	0.898023	-0.0375321	0.00341071	2.6e-28	0.00206696	0.0011981	0.084
rs2235740	1	16243424	C	A	0.893046	-0.0386107	0.00333989	4.8e-31	0.00231932	0.00117626	0.049
rs2235741	1	16243482	C	T	0.89788	-0.0376698	0.00340917	1.4e-28	0.00219093	0.00119754	0.067
rs2235742	1	16243563	C	T	0.898012	-0.0375288	0.00341072	2.6e-28	0.00204998	0.00119809	0.087
rs2235743	1	16243571	C	T	0.898025	-0.037528	0.00341073	2.6e-28	0.00206614	0.0011981	0.085
rs2235744	1	16243598	G	A	0.897824	-0.0374482	0.00340793	3.1e-28	0.00205995	0.00119761	0.085
rs848201	1	16245362	G	A	0.898023	-0.0375257	0.00341065	2.7e-28	0.00206728	0.00119808	0.084
1:16246546_CT_C	1	16246546	CT	C	0.885861	-0.0359209	0.00333844	1.3e-26	0.00172758	0.00117257	0.14
rs848202	1	16247681	G	A	0.898024	-0.0375224	0.00341061	2.7e-28	0.0020672	0.00119806	0.084
rs848203	1	16250666	A	G	0.893021	-0.0385885	0.00333936	5.2e-31	0.00235019	0.00117612	0.046
1:16252052_CT_C	1	16252052	CT	C	0.925555	-0.0306783	0.00394235	1.2e-14	0.00106925	0.00138394	0.44
rs848204	1	16252670	C	A	0.897825	-0.0374333	0.00340776	3.3e-28	0.00206003	0.00119755	0.085
rs848205	1	16252879	T	C	0.891769	-0.0355516	0.00337575	5.1e-26	0.00226256	0.00118625	0.056
rs848206	1	16252996	T	C	0.898002	-0.0375464	0.00341015	2.6e-28	0.00207713	0.00119787	0.083
rs768676172	1	16253189	CT	C	0.82532	-0.0259618	0.00291932	7.7e-19	0.00207051	0.00102681	0.044
rs848208	1	16255644	C	T	0.897978	-0.0375534	0.00341015	2.3e-28	0.00212552	0.00119791	0.076
rs848211	1	16260916	C	T	0.898016	-0.0375395	0.00341066	2.5e-28	0.0020881	0.00119809	0.081
rs61749277	1	16262404	C	T	0.898032	-0.0375396	0.00341079	2.6e-28	0.00208689	0.00119814	0.082
rs848213	1	16264264	G	A	0.886547	-0.0342109	0.00326653	8.2e-26	0.00221324	0.00114678	0.054
rs848215	1	16267147	C	T	0.897792	-0.0372639	0.00340761	5.7e-28	0.00213114	0.00119699	0.075
rs848216	1	16271180	T	C	0.892318	-0.0387617	0.00333429	3.1e-31	0.00243488	0.00117442	0.038
rs61782258	1	16272933	A	C	0.925716	-0.0310022	0.00395039	6.3e-15	0.00120267	0.001386	0.39
rs698891	1	16274769	C	T	0.892984	-0.0386603	0.00333959	4.4e-31	0.00239881	0.00117611	0.041
rs848218	1	16275506	T	C	0.812474	-0.0247314	0.00264204	5.2e-21	0.00219141	0.000929818	0.018
rs848188	1	16277082	A	C	0.897605	-0.0373867	0.00340555	4.8e-28	0.00193534	0.00119616	0.11
rs848189	1	16277647	C	T	0.807335	-0.0207119	0.00261696	4.6e-15	0.000925787	0.000920787	0.31
rs848190	1	16278294	G	T	0.897977	-0.0375274	0.00341053	3.1e-28	0.00208951	0.00119805	0.081
rs848191	1	16279831	A	G	0.897864	-0.037582	0.00341059	2.6e-28	0.0021142	0.00119807	0.078
rs848193	1	16285267	C	G	0.892995	-0.0386275	0.00334033	5.1e-31	0.00239896	0.0011764	0.041
rs848196	1	16287209	G	A	0.897978	-0.0375056	0.00341072	3.3e-28	0.00208288	0.00119806	0.082
1:16288729_GA_G	1	16288729	GA	G	0.897949	-0.0374828	0.00341186	3.8e-28	0.00210472	0.00119838	0.079
rs848197	1	16289183	C	T	0.984546	-0.0515596	0.00836513	5.4e-09	0.0027125	0.00292871	0.35
rs848198	1	16290262	A	G	0.897951	-0.0373756	0.00341178	5.1e-28	0.00209032	0.00119839	0.081
rs848200	1	16293592	C	T	0.897998	-0.0371803	0.0034164	1e-27	0.00194524	0.00120017	0.11
rs34659308	1	16298381	C	CT	0.176978	0.0240822	0.00292625	4.7e-16	-0.00204391	0.00102944	0.047
rs848295	1	16306012	G	C	0.102107	0.0371959	0.00341156	9.5e-28	-0.00202109	0.00119817	0.092
1:16307380_AAAATAAATAAATAAAT_A	1	16307380	AAAATAAATAAATAAAT	A	0.102716	0.0372372	0.00340669	7.6e-28	-0.0019227	0.00119691	0.11
rs848310	1	16309073	A	G	0.106951	0.0383122	0.0033425	1.7e-30	-0.00231673	0.00117658	0.049
rs848312	1	16309856	C	T	0.102109	0.0371879	0.00341179	9.6e-28	-0.00200887	0.00119825	0.094
rs848313	1	16310183	C	T	0.102109	0.0371866	0.00341182	9.7e-28	-0.00200931	0.00119827	0.094
rs1739812	1	16311027	C	A	0.106949	0.0383114	0.00334276	1.7e-30	-0.00231642	0.00117668	0.049
rs7516754	1	16311231	T	C	0.102107	0.0371813	0.003412	9.9e-28	-0.00200963	0.00119833	0.094
1:16312023_AT_A	1	16312023	AT	A	0.102301	0.0372332	0.00341262	8.2e-28	-0.00203926	0.0011986	0.089
rs1763632	1	16312138	T	C	0.102107	0.037169	0.00341216	1e-27	-0.0019991	0.00119838	0.095
rs1739814	1	16312732	A	C	0.102103	0.0371695	0.00341226	1e-27	-0.00201034	0.00119842	0.093
rs1739815	1	16313274	A	T	0.102102	0.0371655	0.00341235	1.1e-27	-0.00201114	0.00119845	0.093
rs1739816	1	16313363	T	C	0.102102	0.0371642	0.00341236	1.1e-27	-0.00201071	0.00119846	0.093
rs2983120	1	16313867	T	C	0.102099	0.0371563	0.00341254	1.1e-27	-0.00201163	0.00119852	0.093
rs9287283	1	16314185	T	A	0.102093	0.037126	0.00341291	1.2e-27	-0.00201256	0.00119866	0.093
rs864240	1	16314269	A	G	0.10209	0.0371158	0.00341302	1.3e-27	-0.00201364	0.00119869	0.093
rs200574131	1	16314467	CTG	C	0.102335	0.0371529	0.00341563	1.1e-27	-0.00207892	0.00119969	0.083
rs1763630	1	16314535	C	T	0.102076	0.0370342	0.0034134	1.7e-27	-0.00201084	0.0011988	0.093
rs861897	1	16314559	T	C	0.102073	0.0370285	0.0034134	1.8e-27	-0.00201168	0.00119881	0.093
rs848298	1	16314900	T	C	0.102084	0.0370727	0.00341322	1.5e-27	-0.00201563	0.00119877	0.093
rs848299	1	16314957	T	A	0.102084	0.0370729	0.00341323	1.5e-27	-0.00201547	0.00119878	0.093
rs848300	1	16315146	C	T	0.102079	0.0370276	0.00341333	1.7e-27	-0.00202248	0.00119881	0.092
rs1739817	1	16315223	G	A	0.101664	0.0374747	0.00342429	5.5e-28	-0.00203513	0.0012026	0.091
rs1763627	1	16315227	C	G	0.101659	0.0374319	0.00342439	6.3e-28	-0.00204219	0.00120263	0.089
rs848301	1	16315262	C	G	0.101662	0.0374514	0.00342431	5.9e-28	-0.00204462	0.0012026	0.089
rs848302	1	16316119	T	A	0.173485	0.0204192	0.00272389	1.8e-13	-0.00161077	0.000957588	0.093
rs848303	1	16316516	T	C	0.0911156	0.0346587	0.00359139	2.4e-21	-0.00142651	0.0012618	0.26
rs848304	1	16316631	T	C	0.0955649	0.0330382	0.00351766	3.8e-20	-0.00152674	0.0012352	0.22
rs848305	1	16316825	A	T	0.0953863	0.0332037	0.00352266	2.3e-20	-0.00155172	0.00123691	0.21
rs848306	1	16317706	A	G	0.099529	0.0322562	0.00345145	5.8e-20	-0.0018242	0.00121197	0.13
rs848307	1	16319232	A	G	0.0996897	0.0319989	0.0034481	9e-20	-0.00183962	0.00121087	0.13
rs848308	1	16321901	A	G	0.0997143	0.0320068	0.00344719	8.7e-20	-0.00182246	0.00121058	0.13
rs1739818	1	16322585	T	C	0.0998089	0.0320713	0.00344687	7.2e-20	-0.00180073	0.00121046	0.14
rs1739819	1	16323313	C	T	0.0997241	0.0320923	0.00344613	7.1e-20	-0.00181985	0.0012102	0.13
rs733855	1	16324881	A	G	0.0997472	0.0320419	0.00344451	7.9e-20	-0.00180074	0.00120964	0.14
rs1739823	1	16325048	A	G	0.0997502	0.0320377	0.00344433	7.9e-20	-0.00179955	0.00120957	0.14
rs1763621	1	16325972	G	A	0.0997673	0.0320282	0.00344331	7.8e-20	-0.00179373	0.00120921	0.14
rs1763620	1	16326021	C	T	0.0997527	0.0319951	0.00344328	8.5e-20	-0.00179645	0.00120922	0.14
rs112913412	1	16326043	T	TTTTA	0.107418	0.0295122	0.00339473	1.8e-17	-0.00215353	0.00119208	0.071
rs1739825	1	16326113	C	T	0.099753	0.0319931	0.00344329	8.6e-20	-0.00179799	0.00120922	0.14
rs1739826	1	16326175	C	T	0.0999457	0.0319812	0.00344302	9.1e-20	-0.00181813	0.00120922	0.13
rs12057691	1	16326525	G	A	0.915867	-0.0273212	0.00371733	3.5e-13	0.00159591	0.00130643	0.22
rs12068573	1	16326604	C	T	0.915871	-0.0273296	0.00371743	3.4e-13	0.00159661	0.00130645	0.22
rs12057768	1	16326701	G	A	0.915871	-0.0273254	0.00371741	3.5e-13	0.00159864	0.00130644	0.22
rs12057806	1	16326789	G	A	0.914549	-0.0267292	0.00369128	1e-12	0.00151861	0.00129779	0.24
rs12096463	1	16326918	T	C	0.914548	-0.0267204	0.00369122	1e-12	0.00152136	0.00129777	0.24
rs10927882	1	16327229	T	C	0.914564	-0.0267706	0.0036914	9.3e-13	0.00151763	0.00129782	0.24
rs12095644	1	16327566	A	G	0.914604	-0.026837	0.00369293	8.3e-13	0.00149148	0.0012984	0.25
rs12059258	1	16327614	G	A	0.914548	-0.0267137	0.00369116	1e-12	0.00152708	0.00129774	0.24
rs61783986	1	16329006	A	G	0.91581	-0.0272938	0.00371656	3.4e-13	0.00159194	0.00130614	0.22
rs3738646	1	16332679	T	C	0.91581	-0.0272473	0.00371802	3.8e-13	0.00160739	0.00130667	0.22
rs61783987	1	16337908	C	T	0.915806	-0.0270005	0.00371861	6.4e-13	0.00163233	0.00130686	0.21
1:16339669_AGGGGGCTGCT_A	1	16339669	AGGGGGCTGCT	A	0.915857	-0.0271744	0.00372047	4.2e-13	0.00167338	0.00130754	0.2
rs61783988	1	16342597	A	G	0.915843	-0.02702	0.00371941	6e-13	0.00162442	0.00130722	0.21
rs3738643	1	16343324	G	C	0.91591	-0.0269636	0.00372065	7.6e-13	0.00161928	0.00130762	0.22
rs3738640	1	16344466	C	T	0.916063	-0.0272175	0.00372199	3.7e-13	0.00176389	0.00130813	0.18
rs56783248	1	16344684	G	A	0.916077	-0.0271882	0.00372166	4.3e-13	0.00173914	0.001308	0.18
rs3754331	1	16345148	C	T	0.916073	-0.0271254	0.00372214	4.7e-13	0.00175933	0.00130819	0.18
rs3754329	1	16345255	C	A	0.916069	-0.027141	0.00372214	4.6e-13	0.00175532	0.0013082	0.18
rs3754324	1	16346248	G	C	0.915949	-0.0271635	0.0037209	4.8e-13	0.00176953	0.00130763	0.18
rs3754323	1	16346457	T	G	0.915945	-0.0271591	0.00372093	4.8e-13	0.00177011	0.00130764	0.18
rs12083572	1	16347542	C	A	0.915923	-0.0271605	0.00372103	4.9e-13	0.00179187	0.00130767	0.17
rs3897352	1	16347854	C	A	0.915932	-0.0272165	0.00372168	4.5e-13	0.0018083	0.00130782	0.17
rs61771057	1	16350692	G	C	0.915653	-0.02677	0.00371574	1e-12	0.00185251	0.00130567	0.16
rs12095949	1	16361164	C	T	0.868898	-0.018854	0.00318115	5.8e-09	0.00177821	0.00112053	0.11
rs781342601	1	16363148	AG	A	0.91981	-0.0275033	0.00383624	2.4e-12	0.00194386	0.0013487	0.15
rs59301753	1	16365210	C	A	0.915918	-0.0266396	0.00373043	1.9e-12	0.00194464	0.00131105	0.14
rs145130478	1	16366306	A	AGGGAC	0.919112	-0.0262096	0.00385832	1.2e-11	0.00165469	0.00135562	0.22
rs4911983	1	19638090	G	C	0.810034	0.0186236	0.002628	3.2e-12	-3.40605e-05	0.00092736	0.97
rs7521086	1	19647111	G	A	0.682501	0.0145786	0.00227743	7.3e-11	-0.000443127	0.000802333	0.58
rs214312	1	19647366	T	C	0.571936	-0.0133513	0.00209597	8.1e-10	0.000469959	0.00073779	0.52
1:19654666_GTTT_G	1	19654666	GTTT	G	0.78273	0.0165388	0.002518	3.2e-11	0.0002034	0.000887135	0.82
rs12117356	1	19658162	C	G	0.783089	0.0169027	0.00250774	1.1e-11	0.000226913	0.000883556	0.8
rs12117357	1	19658172	C	T	0.783091	0.0168863	0.00250783	1.1e-11	0.000226158	0.000883605	0.8
rs3748756	1	19658506	C	T	0.783037	0.0169034	0.00250692	1.1e-11	0.000201172	0.000883265	0.82
rs4912071	1	19658817	T	C	0.783012	0.0169307	0.00250899	1.1e-11	0.000224998	0.000883963	0.8
rs12118471	1	19659349	C	T	0.782812	0.0168564	0.00250558	1.3e-11	0.000151724	0.000882823	0.86
rs35173191	1	19664442	C	T	0.782629	0.016891	0.00250223	1.1e-11	0.000165279	0.000881621	0.85
rs749776742	1	19665456	CA	C	0.891005	0.0203142	0.00340227	3.7e-09	0.00203935	0.00120497	0.091
rs6889	1	19665497	A	C	0.775326	0.0156333	0.00249102	1.8e-10	0.000227279	0.000877979	0.8
rs2268810	1	19667481	T	G	0.782616	0.0170507	0.00249913	7e-12	0.00019416	0.000880527	0.83
rs12124843	1	19669235	A	G	0.779556	0.0171561	0.00249521	6.1e-12	8.44572e-05	0.000879031	0.92
rs4912072	1	19672376	G	A	0.783714	0.0168016	0.00250545	1.3e-11	0.000149302	0.000882744	0.87
rs4912073	1	19673490	A	T	0.781957	0.015974	0.00256055	3.4e-10	0.000177364	0.000902022	0.84
rs56386422	1	19674266	C	A	0.783689	0.0168021	0.00250605	1.3e-11	0.000140714	0.000883003	0.87
rs7540995	1	19675736	C	T	0.779397	0.0177268	0.00249391	1.2e-12	0.000270352	0.000878337	0.76
rs1535036	1	19676924	C	A	0.779286	0.0176521	0.00249554	1.5e-12	0.00027575	0.000878895	0.75
rs2268805	1	19679556	A	G	0.764317	0.0185779	0.00245868	8.1e-15	0.000202548	0.000865285	0.81
rs761308	1	19680119	C	T	0.789643	0.0192033	0.00256311	6.4e-14	0.000700175	0.000902359	0.44
rs12751502	1	19680532	C	T	0.786214	0.0190901	0.00253527	5e-14	0.000380546	0.00089272	0.67
rs214341	1	19680558	A	G	0.590518	-0.0134626	0.00211428	7.6e-10	-0.000514437	0.000744815	0.49
rs214342	1	19681393	C	T	0.771126	0.0194533	0.00247918	1.1e-15	0.000166135	0.000872207	0.85
rs904964	1	19697065	T	C	0.768737	0.0200468	0.00245335	6.6e-17	-0.000113544	0.000863451	0.9
rs3790768	1	19698501	G	T	0.76782	0.0203231	0.0024478	2.8e-17	-0.000116928	0.000861515	0.89
rs7519264	1	19702007	A	G	0.686594	-0.013341	0.00222581	2.5e-09	-0.00104823	0.000782021	0.18
rs10753560	1	19708577	T	C	0.231672	-0.0200818	0.00244941	6.8e-17	0.000116195	0.000862027	0.89
1:19709940_CAAA_C	1	19709940	CAAA	C	0.71996	0.015221	0.00230446	1.3e-11	-6.65071e-06	0.000810424	0.99
rs4912081	1	19710002	G	T	0.720165	0.0150497	0.00230188	2.5e-11	-3.44659e-05	0.000809546	0.97
rs12136926	1	19710794	G	A	0.720166	0.015055	0.00230193	2.5e-11	-3.38749e-05	0.000809561	0.97
rs10917438	1	19711749	G	A	0.720158	0.0150366	0.002302	2.6e-11	-3.40992e-05	0.000809583	0.97
rs10753561	1	19711939	T	C	0.720152	0.0150711	0.00230197	2.3e-11	-3.03351e-05	0.000809576	0.97
rs1472566	1	19713004	T	C	0.378738	0.0167093	0.00212888	1.3e-14	-0.000226966	0.000749818	0.76
rs1472567	1	19713378	T	A	0.380686	0.0166879	0.00212643	1.4e-14	-0.000214972	0.000749089	0.77
rs144183690	1	19713575	G	GTAGGCCCTTTACA	0.382652	0.0166985	0.00213876	1.4e-14	-0.000192127	0.000753307	0.8
rs884630	1	19715311	A	G	0.381414	0.016814	0.00212518	9.6e-15	-0.000261062	0.000748662	0.73
rs884629	1	19715410	C	G	0.381492	0.0167933	0.00212512	1e-14	-0.000254876	0.000748646	0.73
rs10737476	1	19715919	G	A	0.380666	0.0169308	0.00212941	5.6e-15	-0.000243018	0.000750116	0.75
rs10733035	1	19716070	T	C	0.381629	0.0167466	0.00212523	1.3e-14	-0.000245183	0.000748664	0.74
rs4912082	1	19716796	T	C	0.712551	0.0140625	0.00228726	3.1e-10	3.19925e-05	0.000804277	0.97
rs12140654	1	19716801	C	T	0.720833	0.0149162	0.0023048	4.2e-11	1.93386e-05	0.000810424	0.98
rs4912083	1	19717215	A	G	0.381514	0.0168088	0.00212519	9.7e-15	-0.000230231	0.000748649	0.76
rs11388908	1	19717565	C	CT	0.389287	0.0167493	0.00213917	9.2e-15	-0.000403808	0.000753559	0.59
rs12141760	1	19717901	C	T	0.719607	0.0150242	0.0023012	3.1e-11	0.000131675	0.000809076	0.87
rs777885759	1	19717961	CAGAGG	C	0.767222	0.0202882	0.00244892	3.1e-17	-3.47886e-05	0.000861808	0.97
rs756306258	1	19718673	TCTCAAGGTAAAAAAAAAAAA	T	0.370458	0.0170624	0.00215739	7.1e-15	-0.00034488	0.000759937	0.65
rs12094018	1	19719697	C	T	0.619247	-0.0169561	0.0021263	5.8e-15	0.000174721	0.000748995	0.82
rs6426798	1	19719728	C	T	0.718987	0.0149123	0.002299	2.9e-11	0.000143215	0.000808366	0.86
rs4595382	1	19720151	G	T	0.429707	0.0188402	0.00208619	9.3e-19	-0.000255517	0.000734912	0.73
rs4488059	1	19720619	T	C	0.378076	0.0172011	0.0021297	2.4e-15	-0.000191693	0.000750049	0.8
rs10799806	1	19721041	G	C	0.381036	0.0171378	0.00212645	3.3e-15	-0.000190086	0.000748997	0.8
rs10799807	1	19721167	G	A	0.381038	0.0171572	0.00212651	3e-15	-0.000191261	0.000749012	0.8
rs4911987	1	19721503	C	T	0.428792	0.0187457	0.0020873	1.1e-18	-0.000233731	0.000735213	0.75
rs4912084	1	19721548	A	G	0.377911	0.0171965	0.00212987	2.6e-15	-0.000182887	0.000750101	0.81
1:19723280_CA_C	1	19723280	CA	C	0.343073	0.0150448	0.0022001	1.4e-11	0.00100366	0.000773702	0.19
rs34873850	1	19723310	T	C	0.76704	0.0203512	0.00244576	2.7e-17	2.56946e-05	0.000860534	0.98
rs771032443	1	19723575	CTG	C	0.764535	0.0202677	0.00244193	2.8e-17	-0.000110643	0.00085956	0.9
rs10917443	1	19724079	T	G	0.764842	0.020182	0.00243848	3.1e-17	-3.35275e-05	0.000858321	0.97
rs34032610	1	19724323	A	AG	0.424806	0.0189251	0.00209233	5.7e-19	-0.000330135	0.00073689	0.65
rs4911988	1	19724480	G	A	0.764722	0.0202075	0.0024385	3.4e-17	-2.09638e-05	0.000858313	0.98
rs759810354	1	19724712	CAGTCATCCTGCCACACCTGCTCAGTCTCCCGATGAGCCAG	C	0.766925	0.0204732	0.00244973	2e-17	-9.57507e-05	0.000862016	0.91
rs11578302	1	19724835	A	G	0.764816	0.0201708	0.00243847	3.3e-17	-3.01131e-05	0.000858317	0.97
rs7516504	1	19724972	T	C	0.425304	0.0188423	0.00209016	6.7e-19	-0.000292733	0.00073609	0.69
rs7513800	1	19725033	A	G	0.425315	0.0188384	0.00209014	6.7e-19	-0.000281565	0.000736085	0.7
1:19725372_CT_C	1	19725372	CT	C	0.370312	0.0167316	0.00221588	4.5e-13	-0.000645475	0.000780572	0.41
rs10799809	1	19727062	C	T	0.42586	0.018986	0.00208976	3.8e-19	-0.000266505	0.000735997	0.72
rs6698682	1	19727145	T	G	0.425623	0.018931	0.00208988	4.7e-19	-0.000274449	0.000736024	0.71
rs71577891	1	19727703	G	GA	0.743612	0.0208384	0.00240976	7.9e-19	-0.000624717	0.000848044	0.46
rs4911989	1	19727743	C	G	0.765324	0.0204438	0.00244055	1.4e-17	1.06738e-05	0.00085895	0.99
rs4912085	1	19729087	G	C	0.425634	0.018974	0.00208985	3.8e-19	-0.000289272	0.00073602	0.69
rs748600898	1	19729198	CA	C	0.767312	0.0206686	0.00245169	9e-18	-5.48863e-05	0.000862615	0.95
rs11428668	1	19729554	C	CA	0.76619	0.0208754	0.00245234	3.6e-18	-6.1156e-05	0.000863163	0.94
rs4912086	1	19730181	A	G	0.765724	0.020397	0.00244226	1.8e-17	5.35823e-05	0.000859635	0.95
rs7515937	1	19730346	T	C	0.42489	0.0188814	0.00209065	5.4e-19	-0.000237749	0.000736231	0.75
rs12726451	1	19730865	G	C	0.424901	0.0188837	0.0020906	5.5e-19	-0.000233886	0.000736222	0.75
rs12403041	1	19730927	A	G	0.768784	0.0206739	0.00245516	1.1e-17	4.95196e-05	0.000863704	0.95
rs12726614	1	19730957	G	C	0.765577	0.0204456	0.0024423	1.5e-17	6.66685e-05	0.000859669	0.94
rs34429742	1	19731037	TAAAAAAAAAA	T	0.357845	0.0162015	0.00216831	6.8e-13	-0.000582945	0.000763444	0.45
rs4911990	1	19731873	A	C	0.763836	0.020169	0.00243519	2.3e-17	6.85742e-05	0.000857429	0.94
rs881246	1	19733255	C	A	0.768103	0.0205302	0.00245014	1.9e-17	6.92356e-05	0.000861945	0.94
rs881247	1	19733320	A	G	0.765696	0.0202749	0.00244199	2.9e-17	5.09357e-05	0.000859561	0.95
rs881248	1	19733961	T	C	0.765687	0.0202938	0.00244208	2.6e-17	4.61551e-05	0.000859596	0.96
rs4244001	1	19734368	C	T	0.765696	0.020275	0.00244199	2.9e-17	5.11254e-05	0.000859563	0.95
rs12125806	1	19734781	A	G	0.765683	0.0202748	0.00244207	2.7e-17	3.77987e-05	0.000859593	0.96
rs12125959	1	19735262	A	G	0.765621	0.0202431	0.00244185	3.2e-17	6.38174e-05	0.000859521	0.94
rs12403329	1	19735793	G	C	0.768098	0.0205294	0.0024501	1.9e-17	6.04601e-05	0.000861935	0.94
rs12404783	1	19735885	A	C	0.768104	0.0205328	0.00245014	1.9e-17	5.95911e-05	0.000861944	0.94
rs9287046	1	19736395	G	C	0.765696	0.0202873	0.00244202	2.6e-17	3.60282e-05	0.000859577	0.97
rs9287047	1	19736534	T	C	0.765684	0.020278	0.00244209	2.7e-17	3.89704e-05	0.0008596	0.96
rs2314145	1	19736843	C	G	0.765684	0.0202818	0.0024421	2.7e-17	3.8495e-05	0.000859603	0.96
rs4244002	1	19738190	C	T	0.763985	0.0202348	0.00243651	2e-17	7.43155e-05	0.000857877	0.93
rs6426800	1	19739156	G	A	0.425251	0.0189252	0.00209018	4.4e-19	-0.000270226	0.000736144	0.71
rs12404362	1	19739958	A	G	0.765785	0.0204134	0.00244246	1.8e-17	3.27909e-05	0.000859738	0.97
rs6676572	1	19740069	T	C	0.377752	0.0171297	0.00213069	3.3e-15	-0.000197484	0.000750402	0.79
rs776232232	1	19740097	GGATTATAAGTGT	G	0.765757	0.0206135	0.00244606	1.1e-17	-5.49198e-05	0.000861061	0.95
rs12121189	1	19740421	G	A	0.76575	0.0203379	0.0024421	2.3e-17	9.70136e-06	0.000859611	0.99
rs12121242	1	19740609	G	C	0.765771	0.0203764	0.00244212	2e-17	2.65695e-06	0.000859618	1
rs4912088	1	19745800	C	T	0.318008	0.0137657	0.00221962	4.9e-10	0.00106279	0.000780151	0.17
rs3790759	1	19746599	C	T	0.310201	0.0138129	0.00223389	4.3e-10	0.0011758	0.000785135	0.13
rs3829833	1	19747496	G	T	0.310443	0.0138534	0.00223346	4.5e-10	0.00117452	0.000785027	0.13
rs3813984	1	19747735	G	A	0.306706	0.0133195	0.0022404	2.2e-09	0.00112549	0.000787128	0.15
rs4912089	1	19749103	C	T	0.310307	0.0137744	0.00223356	4.8e-10	0.00116293	0.000785019	0.14
1:19749346_GAT_G	1	19749346	GAT	G	0.774958	0.0216843	0.00247636	6.2e-19	0.000331506	0.000871602	0.7
rs4912090	1	19749402	T	C	0.774233	0.0217254	0.00247113	5e-19	0.000349818	0.000869969	0.69
rs6686979	1	19749676	A	G	0.309096	0.0140148	0.00223906	2.6e-10	0.00113217	0.000787009	0.15
rs6689918	1	19749679	T	C	0.309099	0.0140127	0.00223905	2.6e-10	0.00113156	0.000787006	0.15
rs10917447	1	19749743	T	C	0.775225	0.0215181	0.00247495	1.2e-18	0.00031084	0.000871117	0.72
rs4911992	1	19750486	T	A	0.775231	0.021506	0.00247489	1.2e-18	0.000307513	0.000871095	0.72
rs4912091	1	19751583	T	C	0.310498	0.0137151	0.00223279	5.1e-10	0.00116542	0.000784765	0.14
rs12566399	1	19753127	T	C	0.30679	0.0132382	0.00223961	2.3e-09	0.00111042	0.000786861	0.16
rs61334679	1	19754993	G	A	0.775098	0.0214661	0.00247363	1.3e-18	0.000325271	0.00087061	0.71
rs35542350	1	19756653	T	G	0.870659	0.023484	0.00307514	7.5e-14	0.000897703	0.00108519	0.41
rs116393108	1	19756706	G	A	0.93294	0.027909	0.00419655	3.4e-10	0.00367138	0.00148098	0.013
rs10917449	1	19756869	A	G	0.762609	0.0199372	0.0024257	8.3e-17	0.000323864	0.000853568	0.7
rs2088828	1	19757646	C	A	0.728546	0.0159847	0.00232089	3e-12	0.000511344	0.000816037	0.53
rs753724295	1	19758079	GT	G	0.728485	0.015964	0.0023214	3.2e-12	0.000475914	0.000816276	0.56
rs12136530	1	19761429	A	G	0.789349	0.016399	0.00271493	8.7e-10	0.000713789	0.000954997	0.45
rs12136534	1	19761435	A	T	0.755188	0.0141866	0.00245093	2.5e-09	0.000812026	0.000861188	0.35
rs12137479	1	19761445	T	A	0.755237	0.0142056	0.00245103	2.3e-09	0.000782033	0.000861233	0.36
rs4912093	1	19762321	T	C	0.728594	0.0158191	0.00232173	4.8e-12	0.000536356	0.000816302	0.51
rs4912094	1	19762466	C	T	0.728563	0.0158803	0.00232162	3.9e-12	0.000532571	0.000816303	0.51
rs7522676	1	19762660	T	C	0.728594	0.0158096	0.00232178	4.9e-12	0.000534678	0.000816324	0.51
rs756147415	1	19763165	TAA	T	0.744528	0.0170265	0.00241575	1.5e-12	0.000585937	0.000849751	0.49
rs115773162	1	19763168	G	T	0.728657	0.0159521	0.00232241	3.2e-12	0.000494672	0.000816619	0.54
rs201259906	1	19763169	G	T	0.728657	0.0159521	0.00232241	3.2e-12	0.000494672	0.000816619	0.54
rs12137160	1	19763379	C	T	0.728517	0.0158789	0.00232159	3.9e-12	0.000524973	0.000816321	0.52
rs12137162	1	19763396	C	A	0.728517	0.0158788	0.00232159	3.9e-12	0.000525021	0.000816321	0.52
rs12137192	1	19763458	C	G	0.728533	0.0158774	0.00232157	3.9e-12	0.000523236	0.000816316	0.52
rs10799810	1	19764032	G	A	0.728506	0.0158556	0.00232158	4.3e-12	0.000529763	0.000816326	0.52
rs4911995	1	19765004	G	C	0.728526	0.0158809	0.00232154	3.9e-12	0.000529488	0.000816304	0.52
rs4911996	1	19765205	G	C	0.728595	0.0158321	0.00232175	4.6e-12	0.000543133	0.00081631	0.51
rs4911998	1	19765834	C	T	0.728526	0.0158877	0.00232156	3.8e-12	0.000531023	0.000816311	0.52
rs4912095	1	19766236	T	C	0.728594	0.0158276	0.00232194	4.7e-12	0.000542653	0.000816373	0.51
rs12140338	1	19766430	C	G	0.72856	0.0158973	0.00232178	3.7e-12	0.000541966	0.000816356	0.51
rs10158117	1	19766747	G	C	0.728522	0.0158965	0.00232179	3.8e-12	0.000530949	0.000816389	0.52
rs34137921	1	19767485	C	T	0.730056	0.0158757	0.00233128	5.5e-12	0.000507431	0.000819754	0.54
rs9651024	1	19768954	T	C	0.728468	0.0159394	0.00232233	3.4e-12	0.000554938	0.000816576	0.5
rs9651016	1	19769241	G	C	0.728584	0.015878	0.00232292	4.2e-12	0.000536027	0.00081679	0.51
rs10917451	1	19769323	G	C	0.728653	0.0158249	0.00232316	5e-12	0.000549294	0.00081681	0.5
rs60052942	1	19769718	C	CA	0.735848	0.0165575	0.00237621	2e-12	0.000421836	0.000835395	0.61
rs10799812	1	19770256	C	T	0.728488	0.0159411	0.00232286	3.4e-12	0.000549218	0.000816758	0.5
rs71008164	1	19770655	G	GA	0.730698	0.0161822	0.00233653	2.2e-12	0.000501785	0.00082145	0.54
rs904966	1	19772177	G	C	0.728549	0.0159195	0.00232372	3.7e-12	0.000582597	0.000817076	0.48
rs877012	1	19772660	G	A	0.728522	0.0159261	0.00232382	3.7e-12	0.000588851	0.000817068	0.47
rs880361	1	19773421	A	T	0.732476	0.0157831	0.00233707	1e-11	0.000558352	0.000821846	0.5
rs10442642	1	19773818	A	G	0.732779	0.016058	0.00234406	6e-12	0.000418296	0.000824112	0.61
rs58952060	1	19774582	G	A	0.732623	0.0157053	0.00233994	1.6e-11	0.000583419	0.000822766	0.48
rs12409301	1	19774715	G	A	0.732682	0.0156381	0.00233989	1.9e-11	0.000593683	0.000822752	0.47
rs4912096	1	19775113	T	C	0.732676	0.0156394	0.00233985	1.8e-11	0.0005931	0.000822742	0.47
rs10442634	1	19775246	C	T	0.732701	0.015676	0.00233995	1.7e-11	0.000590927	0.000822771	0.47
rs10442635	1	19775492	A	G	0.732665	0.0156247	0.0023399	1.9e-11	0.000590029	0.000822762	0.47
rs66932922	1	19776143	G	A	0.732664	0.0156242	0.00233992	1.9e-11	0.000589629	0.00082277	0.47
rs16862798	1	19777837	A	G	0.732665	0.0156238	0.00233997	1.9e-11	0.00059036	0.000822786	0.47
rs34929465	1	19777950	G	A	0.732665	0.0156232	0.00233997	1.9e-11	0.000590278	0.000822787	0.47
rs760089039	1	19778236	CTCTAA	C	0.731952	0.0158371	0.00234463	1e-11	0.000448568	0.00082434	0.59
rs12092284	1	19778323	C	T	0.732897	0.0157619	0.00234056	1.3e-11	0.000617055	0.000822967	0.45
rs34553579	1	19779378	A	C	0.732725	0.0156939	0.00234015	1.6e-11	0.000594333	0.000822808	0.47
rs11590840	1	19779673	T	C	0.732593	0.0156214	0.00233976	1.9e-11	0.000576527	0.000822745	0.48
rs12090885	1	19779781	G	A	0.73273	0.0156841	0.00234021	1.6e-11	0.000592825	0.000822829	0.47
rs883961	1	19781155	G	C	0.732701	0.0156552	0.00234092	1.8e-11	0.000574934	0.000823112	0.48
rs2014772	1	19781247	C	T	0.732979	0.0156519	0.00234192	1.9e-11	0.000625968	0.000823408	0.45
rs1875325	1	19781545	G	T	0.637253	-0.014925	0.0021544	1.4e-11	0.000299306	0.00075859	0.69
rs4912097	1	19784410	C	G	0.732731	0.0156463	0.00234304	1.9e-11	0.000586476	0.000823838	0.48
rs12562821	1	19786650	C	T	0.733163	0.0154959	0.00234975	3.1e-11	0.000587751	0.000826216	0.48
rs12563442	1	19786695	T	C	0.732889	0.0155771	0.00234872	2.4e-11	0.000625193	0.000825831	0.45
rs4912098	1	19787686	G	A	0.733068	0.0155803	0.00235252	2.3e-11	0.00061462	0.00082717	0.46
1:19788951_CA_C	1	19788951	CA	C	0.727966	0.0154524	0.00236406	4.2e-11	0.000388684	0.000831112	0.64
rs12022161	1	19790879	G	A	0.750823	0.0149615	0.00241707	9.9e-11	0.00070374	0.000849642	0.41
rs4481878	1	19791086	C	A	0.248999	-0.0145804	0.0024053	2.9e-10	-0.000881112	0.000845993	0.3
rs12120180	1	19791441	C	T	0.750987	0.0145094	0.00240517	3.6e-10	0.000877147	0.000845972	0.3
rs9887859	1	19792089	A	G	0.750968	0.0144435	0.00240513	4.2e-10	0.00087362	0.000845973	0.3
rs12066114	1	19792527	A	G	0.750978	0.0144145	0.00240502	4.4e-10	0.000870525	0.000845946	0.3
rs4912002	1	19793402	G	T	0.752585	0.0148802	0.00242959	2e-10	0.000750936	0.000853995	0.38
rs1995311	1	19820119	T	G	0.488841	0.0129101	0.00206555	5.6e-11	8.5148e-06	0.000728016	0.99
rs67775937	1	19820854	T	C	0.481763	0.0128682	0.00206884	7.8e-11	1.0557e-05	0.000728964	0.99
rs2088825	1	19821840	C	T	0.518271	-0.0129089	0.00206977	6e-11	-4.06634e-05	0.00072926	0.96
rs2088827	1	19823746	A	G	0.483167	0.0129281	0.00207373	6.4e-11	0.000128153	0.000730697	0.86
rs2314146	1	19824008	A	G	0.482264	0.0128837	0.00206903	7.4e-11	3.22917e-05	0.000729011	0.96
rs7512774	1	19825026	A	G	0.482356	0.0128717	0.00206909	7.6e-11	2.93474e-05	0.000729024	0.97
rs552461800	1	19825463	GTT	G	0.554599	0.0139088	0.00213101	3.3e-11	0.000291791	0.000750784	0.7
rs12077728	1	19825657	G	A	0.482281	0.0128783	0.00206903	7.5e-11	3.92559e-05	0.000729011	0.96
rs12077734	1	19825700	G	C	0.482321	0.0128847	0.00206901	7.3e-11	3.84507e-05	0.000729003	0.96
rs12742507	1	19826540	C	T	0.51816	-0.0129201	0.00206952	6.3e-11	-6.9347e-05	0.000729169	0.92
rs6683419	1	19827780	G	A	0.482292	0.0128906	0.00206926	7.4e-11	4.64617e-05	0.000729082	0.95
rs7550916	1	19828510	A	T	0.482348	0.0128852	0.0020696	7.6e-11	5.54775e-05	0.0007292	0.94
rs10799819	1	19829221	C	G	0.482384	0.0129137	0.00206985	7e-11	6.29306e-05	0.000729286	0.93
rs67032849	1	19829686	T	C	0.482399	0.0128959	0.00207008	7.4e-11	7.08047e-05	0.000729368	0.92
rs540088062	1	19830179	C	CA	0.509156	0.0128581	0.00213038	2.5e-10	1.27397e-05	0.000750304	0.99
rs12083293	1	19830373	A	C	0.482578	0.0129848	0.00207035	5.9e-11	9.36237e-05	0.000729466	0.9
rs12735636	1	19830555	C	T	0.517935	-0.0130164	0.00207066	5.1e-11	-0.000115049	0.000729566	0.87
rs11807639	1	19832241	C	T	0.831832	0.0161056	0.00276354	6.4e-10	0.0005753	0.000973791	0.55
rs11806434	1	19832437	G	A	0.831846	0.0161068	0.00276343	6.5e-10	0.000581439	0.000973748	0.55
rs12136721	1	19832987	C	G	0.831878	0.0161078	0.00276329	6.5e-10	0.000593773	0.000973697	0.54
rs10799820	1	19833728	G	C	0.831817	0.0160064	0.0027628	8.1e-10	0.000602048	0.000973572	0.54
rs75552440	1	19834506	C	T	0.843456	0.0172715	0.00284231	1.8e-10	0.00104299	0.00100137	0.3
rs12138849	1	19835091	C	T	0.832203	0.0161337	0.00276649	6e-10	0.000607797	0.000974863	0.53
rs78800358	1	19835236	T	C	0.832211	0.0161242	0.00276642	6.2e-10	0.00060706	0.000974841	0.53
rs6426808	1	19835415	G	A	0.489843	-0.0139897	0.00206806	3.8e-12	-0.000114146	0.000728671	0.88
rs12093122	1	19836181	T	C	0.832253	0.0161311	0.00276372	6.4e-10	0.000642293	0.000973875	0.51
rs12089728	1	19836184	C	T	0.832253	0.0161314	0.00276372	6.4e-10	0.000642345	0.000973875	0.51
rs75491569	1	19836221	C	T	0.84366	0.0172825	0.00284285	1.8e-10	0.00106252	0.00100156	0.29
rs79251863	1	19836365	G	A	0.832226	0.0161292	0.00276333	6.4e-10	0.00062919	0.000973737	0.52
rs4394682	1	19837537	A	G	0.832276	0.0161431	0.00276318	6.4e-10	0.000626863	0.000973708	0.52
1:19837905_TC_T	1	19837905	TC	T	0.833184	0.0159891	0.00277127	9.5e-10	0.000577514	0.000976701	0.55
rs56983610	1	19838744	C	A	0.833307	0.0161046	0.00276888	7e-10	0.000621367	0.000975746	0.52
rs12138950	1	19839115	A	C	0.848707	0.0173933	0.00289987	2.6e-10	0.000891468	0.00102174	0.38
rs10799824	1	19841174	G	A	0.844767	0.017462	0.00284744	1.1e-10	0.00116426	0.0010031	0.25
rs10917469	1	19843576	A	G	0.844762	0.0176147	0.00284785	7.8e-11	0.00110921	0.00100326	0.27
rs10917470	1	19845206	G	A	0.490348	-0.0140005	0.00206666	2.9e-12	-0.000199913	0.000728225	0.78
rs12410532	1	19845279	C	T	0.844811	0.0176433	0.00284848	7.3e-11	0.001105	0.00100342	0.27
rs55815284	1	19846281	C	G	0.919838	0.0219542	0.00381162	2.5e-09	0.00157197	0.00134425	0.24
rs11589372	1	19849050	C	T	0.488248	-0.0139179	0.00206737	3.5e-12	-0.000196601	0.000728454	0.79
rs139724014	1	19850361	G	T	0.919296	0.0218481	0.00380985	3.2e-09	0.00152816	0.00134377	0.26
rs10917477	1	19861106	A	G	0.523478	-0.0138652	0.00207114	5.3e-12	5.28539e-05	0.000729746	0.94
rs2745213	1	19910978	G	A	0.470525	0.0118998	0.00206966	1e-09	0.000306106	0.000729259	0.67
1:19915213_TGCCACCATGCCAAGCTAA_T	1	19915213	TGCCACCATGCCAAGCTAA	T	0.47383	0.0119679	0.00207605	8.4e-10	0.000368291	0.000731309	0.61
rs1770480	1	19916784	C	T	0.470347	0.0119408	0.0020697	9.9e-10	0.000297673	0.000729259	0.68
rs35998911	1	19920079	T	TC	0.470827	0.0119818	0.00207281	7.9e-10	0.000321004	0.000730262	0.66
rs2745217	1	19921747	C	T	0.468669	0.0117849	0.00206999	1.5e-09	0.000365749	0.00072941	0.62
rs2792043	1	19924662	A	C	0.468774	0.0118163	0.00207004	1.4e-09	0.000362324	0.000729413	0.62
rs1320978	1	19947973	A	G	0.468832	0.0117659	0.00206956	1.7e-09	0.000370057	0.000729271	0.61
rs138293109	1	21847111	C	T	0.919484	-0.0229679	0.00388787	3.9e-09	0.00295041	0.00136439	0.031
rs12402977	1	21852961	T	C	0.847865	0.0215435	0.00288491	2.6e-13	-0.000913384	0.00101372	0.37
rs4654959	1	21853745	G	A	0.848008	0.0215218	0.00288555	2.6e-13	-0.000930319	0.001014	0.36
rs75746521	1	21854901	T	C	0.848446	0.0216345	0.00289093	1.9e-13	-0.000925022	0.00101595	0.36
rs80330518	1	21854903	T	C	0.848423	0.0213545	0.00289042	4.1e-13	-0.000860164	0.00101584	0.4
rs28879424	1	21855106	A	G	0.847922	0.0214911	0.00288306	2.5e-13	-0.000931789	0.00101313	0.36
rs28515012	1	21855273	G	C	0.847929	0.0214868	0.00288294	2.5e-13	-0.000923707	0.00101309	0.36
rs75955217	1	21855329	G	A	0.847929	0.0214856	0.0028829	2.5e-13	-0.000923204	0.00101308	0.36
rs75883780	1	21855390	C	G	0.847929	0.0214868	0.00288283	2.5e-13	-0.000923457	0.00101306	0.36
rs957669	1	21856298	A	T	0.847909	0.0215135	0.00288187	2.3e-13	-0.000920925	0.00101274	0.36
rs10493007	1	21857248	A	G	0.847882	0.0215043	0.00288103	2.3e-13	-0.000916082	0.00101243	0.37
rs61433074	1	21857652	A	G	0.847882	0.021502	0.00288085	2.3e-13	-0.000915598	0.00101237	0.37
rs56963437	1	21857952	A	C	0.847783	0.0215169	0.00288027	2.2e-13	-0.00088155	0.00101222	0.38
rs12563898	1	21859103	G	A	0.847871	0.0216287	0.00287995	1.6e-13	-0.000923878	0.00101208	0.36
rs74807574	1	21859450	A	G	0.847799	0.0215681	0.00287974	1.8e-13	-0.000894048	0.001012	0.38
rs79009615	1	21860282	C	G	0.84775	0.0215581	0.00287899	1.8e-13	-0.0008947	0.0010118	0.38
rs771549931	1	21860427	AAAAG	A	0.314553	0.0179635	0.00231014	7.8e-15	-0.00171368	0.000812976	0.035
rs61158180	1	21860885	T	G	0.847798	0.021551	0.00287899	1.8e-13	-0.000887834	0.00101175	0.38
rs59004364	1	21860986	A	G	0.847794	0.0215472	0.00287892	1.8e-13	-0.00088922	0.00101173	0.38
rs871132	1	21862625	C	T	0.847876	0.021628	0.00287918	1.5e-13	-0.000923633	0.00101184	0.36
rs4654962	1	21866252	A	G	0.85247	0.0233682	0.00291336	4.6e-15	-0.00140358	0.00102414	0.17
rs4654963	1	21866441	G	A	0.852656	0.0235213	0.00291522	3.6e-15	-0.0014152	0.00102464	0.17
rs7547128	1	21866564	G	A	0.52187	0.0124256	0.00207498	2.7e-09	-0.000876088	0.000731091	0.23
rs12565845	1	21866625	G	A	0.852686	0.0235016	0.00291486	3.7e-15	-0.00142422	0.00102451	0.16
rs6671057	1	21867602	T	C	0.470402	0.0121414	0.00207018	3.7e-09	-0.000875157	0.000729114	0.23
rs6682633	1	21868159	G	T	0.470385	0.0121862	0.00206994	3.4e-09	-0.000875867	0.000729025	0.23
rs12127343	1	21869773	A	G	0.530859	0.0134066	0.00206913	6.4e-11	-0.000543328	0.000728807	0.46
rs12128151	1	21869918	T	C	0.470482	0.0122587	0.00206948	2.8e-09	-0.000872874	0.000728866	0.23
rs6666477	1	21870681	C	T	0.530875	0.0134238	0.00206878	6e-11	-0.000547944	0.000728693	0.45
rs6426716	1	21871798	T	G	0.851765	0.0235105	0.00290487	4e-15	-0.00151144	0.00102164	0.14
rs6696066	1	21872004	G	A	0.531353	0.0133982	0.0020684	6.2e-11	-0.00053135	0.000728484	0.47
rs75434377	1	21872132	G	A	0.849331	0.0237734	0.00288572	6.7e-16	-0.00154106	0.00101428	0.13
rs12141569	1	21873002	C	T	0.470787	0.0122532	0.00206814	2.9e-09	-0.000881342	0.000728378	0.23
rs60414268	1	21873204	G	A	0.852467	0.0233383	0.00290714	4.6e-15	-0.00152053	0.00102205	0.14
rs12566520	1	21874187	G	A	0.852482	0.0234911	0.00290769	3.2e-15	-0.00147916	0.00102224	0.15
rs3753782	1	21879524	A	G	0.830777	0.0170342	0.00275389	1.6e-09	-0.00161218	0.000968007	0.096
rs57915975	1	21879643	G	GT	0.0621659	0.0294792	0.00432902	1.8e-11	-0.000705026	0.00151773	0.64
rs950922	1	21880068	A	G	0.851808	0.0243953	0.00292034	3.1e-16	-0.0016844	0.00102716	0.1
rs4654757	1	21884318	A	G	0.808928	0.0205687	0.0026308	3.6e-14	-0.00189646	0.000924991	0.04
rs3841814	1	21884869	C	CGT	0.808824	0.0206574	0.0026322	3.6e-14	-0.00187188	0.000925331	0.043
rs11807480	1	21888694	A	G	0.808694	0.0207264	0.0026302	2.5e-14	-0.0018868	0.000924697	0.041
rs3767154	1	21889016	T	C	0.852513	0.023493	0.00291421	3.1e-15	-0.00164048	0.00102457	0.11
rs1256336	1	21889506	C	T	0.771151	-0.016954	0.00246082	8.8e-12	0.00110907	0.000866489	0.2
rs1780316	1	21889635	T	C	0.0598564	0.0301323	0.00435809	5.9e-12	-0.000466509	0.00152863	0.76
1:21890264_TTGA_T	1	21890264	TTGA	T	0.940056	-0.0309519	0.00436579	2.1e-12	0.000741033	0.00153131	0.63
rs12402697	1	21891861	C	A	0.81491	0.02117	0.00266125	1.3e-14	-0.00181596	0.00093551	0.052
rs1780318	1	21895625	A	T	0.0579254	0.0320203	0.00442103	4.2e-13	-0.000935266	0.00155045	0.55
rs2275367	1	21900589	C	T	0.897113	0.0216908	0.00340224	7.2e-10	-0.00202155	0.00120313	0.093
rs1767447	1	21900891	G	A	0.05763	0.0324039	0.00444154	2.9e-13	-0.00111759	0.00155799	0.47
rs1536934	1	21901277	A	G	0.102587	-0.0212445	0.00341441	1.6e-09	0.00189556	0.00120706	0.12
rs1697404	1	21901457	A	G	0.0970216	-0.023021	0.00349818	1.7e-10	0.00186198	0.00123745	0.13
rs61778392	1	21901938	G	A	0.929279	-0.0279274	0.00409063	5.9e-12	0.00124899	0.00143852	0.39
rs1772720	1	21905007	G	A	0.925795	-0.0298316	0.00397116	8.1e-15	0.00055581	0.00139444	0.69
rs771815228	1	21905450	CCAAA	C	0.964152	-0.0358221	0.00568101	1.1e-10	0.00352768	0.00198667	0.076
rs36053309	1	21905604	C	T	0.80342	-0.0212257	0.00259574	2e-16	0.00158202	0.000917038	0.085
rs3121206	1	21907604	G	A	0.19826	0.0208851	0.00260074	6.2e-16	-0.00154017	0.000918871	0.094
rs1313341	1	21911110	A	G	0.0959851	0.0267829	0.00351942	8.8e-15	-0.00037387	0.00123877	0.76
rs144208700	1	21911345	C	T	0.967461	-0.0389996	0.00587643	1.8e-11	0.00044966	0.00205123	0.83
rs1772710	1	21911492	C	G	0.0960202	0.0267056	0.00351854	1e-14	-0.000354822	0.00123847	0.77
rs34745509	1	21912410	C	CA	0.0956264	0.0274078	0.00353854	2.4e-15	-0.000355281	0.00124545	0.78
rs12023600	1	21912832	G	A	0.881503	0.023092	0.00320053	1e-13	-0.00214184	0.00112254	0.056
rs61778395	1	21913811	G	A	0.881202	0.0230688	0.00319477	9.4e-14	-0.00215871	0.00112063	0.054
rs80158185	1	21913854	C	T	0.876116	-0.0181076	0.0031494	1.9e-09	0.00132378	0.00111574	0.24
rs1256279	1	21914362	C	T	0.642321	-0.0125263	0.00215732	7.5e-10	0.00223056	0.000760935	0.0034
rs876940	1	21914800	C	T	0.881438	0.023052	0.00319626	1e-13	-0.00217386	0.00112092	0.052
rs10799704	1	21915085	C	T	0.771728	0.0226431	0.00246611	3.4e-22	-0.00240153	0.000865583	0.0055
rs11577053	1	21915093	T	A	0.864205	0.0219515	0.00302599	7e-14	-0.00163361	0.00106522	0.13
rs11582381	1	21915110	C	T	0.864201	0.0219345	0.00302598	7.4e-14	-0.00163081	0.00106522	0.13
rs72660304	1	21915855	G	A	0.863865	0.0222353	0.00302127	2.9e-14	-0.00163917	0.00106343	0.12
rs56247965	1	21916151	G	A	0.881231	0.0229433	0.00319191	1.3e-13	-0.00216846	0.00111975	0.053
rs762810932	1	21916694	CT	C	0.750075	0.0217001	0.00241216	1.2e-21	-0.00217561	0.000848179	0.01
rs112111282	1	21916738	C	T	0.864397	0.022324	0.00302848	2.8e-14	-0.00165061	0.00106606	0.12
rs113298409	1	21916749	C	T	0.864256	0.0222232	0.00302618	3.5e-14	-0.00166311	0.00106526	0.12
rs1256280	1	21916829	C	T	0.6414	-0.0125545	0.0021566	6.4e-10	0.00224419	0.000760691	0.0032
rs10917021	1	21917234	T	C	0.880424	0.0233842	0.0031783	4.2e-14	-0.00230009	0.00111513	0.039
rs55872776	1	21917302	G	A	0.876179	-0.01812	0.00315013	1.9e-09	0.00129649	0.00111603	0.25
rs74060011	1	21918463	T	C	0.854802	-0.0175516	0.00294858	8.2e-10	0.00114238	0.00104344	0.27
rs74060012	1	21919880	A	T	0.855548	-0.0172077	0.00295365	2.3e-09	0.0011421	0.00104522	0.27
rs829390	1	21920715	C	G	0.0957391	0.026905	0.00352411	6.6e-15	-0.000123065	0.00124037	0.92
rs7515277	1	21921625	G	T	0.855675	-0.0175501	0.00295245	1e-09	0.00114633	0.00104478	0.27
rs7515386	1	21921736	G	A	0.855692	-0.0175632	0.00295281	9.8e-10	0.00115937	0.00104489	0.27
rs55722102	1	21922132	T	C	0.797587	0.0192307	0.00258804	2.4e-14	-0.00152493	0.000909842	0.094
1:21922893_CG_C	1	21922893	CG	C	0.76997	-0.0148346	0.00247415	6.8e-10	0.00245121	0.000872413	0.005
rs2794278	1	21925108	T	C	0.0957327	0.0269465	0.00352279	6.6e-15	-0.000143583	0.0012399	0.91
rs2788642	1	21925388	T	C	0.095687	0.0269019	0.00352416	7.2e-15	-0.000140779	0.0012404	0.91
rs1681257	1	21925657	C	T	0.0957036	0.0268208	0.0035233	8.7e-15	-0.000147525	0.00124003	0.91
rs1767444	1	21926498	G	A	0.640186	-0.0125394	0.00214738	4.9e-10	0.00223084	0.000757431	0.0032
rs565268644	1	21927515	C	CT	0.108541	0.0227763	0.00353442	8.2e-11	0.00016239	0.00124533	0.9
rs829369	1	21927807	T	C	0.554101	-0.018414	0.0020974	1.7e-19	0.00224386	0.00073873	0.0024
rs4654973	1	21927820	C	G	0.450107	-0.0126203	0.00209817	1.7e-09	0.00169956	0.000738683	0.021
rs829368	1	21929260	A	G	0.0956852	0.0265507	0.00352685	1.1e-14	-7.86449e-05	0.00124104	0.95
rs769318405	1	21929456	GC	G	0.223441	0.0244274	0.00250125	1.7e-23	-0.00133821	0.000882749	0.13
rs3767111	1	21930542	C	T	0.738743	0.02412	0.00236663	1.8e-26	-0.00271587	0.000830754	0.0011
1:21931267_AGGAT_A	1	21931267	AGGAT	A	0.0960742	0.0267387	0.00353532	7.9e-15	-0.000177309	0.00124421	0.89
1:21931336_AGATG_A	1	21931336	AGATG	A	0.642425	-0.0123824	0.00218535	6.4e-09	0.00264123	0.000769622	0.0006
1:21931410_ATGGGTGGATGGG_A	1	21931410	ATGGGTGGATGGG	A	0.87208	-0.0178688	0.00312612	5.8e-09	0.00193541	0.00110688	0.08
rs2275365	1	21932625	G	A	0.8925	0.0277128	0.00334977	2.7e-18	-0.00327788	0.00117665	0.0053
rs829370	1	21933193	C	T	0.0960925	0.0260623	0.00351849	2.7e-14	-0.00015931	0.00123813	0.9
rs72660316	1	21934693	T	C	0.864125	0.0206055	0.00300981	2.8e-12	-0.00169456	0.00105951	0.11
rs12130950	1	21935467	G	A	0.863294	0.0204862	0.00298715	2.7e-12	-0.0016499	0.0010513	0.12
rs947334	1	21938897	A	G	0.111263	0.0213797	0.00328157	1e-10	0.000116485	0.00115378	0.92
rs74060024	1	21940285	G	C	0.961442	0.0314754	0.00550327	8.7e-10	-0.00409531	0.00191572	0.033
rs947333	1	21941023	T	C	0.111456	0.0213071	0.00327649	8.9e-11	0.000154131	0.00115221	0.89
rs947332	1	21941310	T	C	0.111258	0.0213047	0.0032784	1.2e-10	0.000136059	0.00115271	0.91
rs1256283	1	21941644	G	T	0.111289	0.0212688	0.00327753	1.2e-10	0.000181561	0.00115243	0.87
rs1256284	1	21942173	G	C	0.111349	0.0214352	0.0032756	8.2e-11	0.00020115	0.00115193	0.86
rs829416	1	21942683	C	T	0.115307	0.0212748	0.00322542	5.5e-11	0.000404295	0.00113404	0.72
rs829417	1	21943136	C	T	0.673382	0.0196712	0.00220195	7.7e-20	-0.00139797	0.00077428	0.071
rs829418	1	21943504	A	G	0.111302	0.0213406	0.0032765	1.2e-10	0.000185881	0.0011521	0.87
rs3835552	1	21945090	T	TC	0.890175	0.0263905	0.00330836	1.2e-16	-0.00285708	0.00116169	0.014
rs12143471	1	21945389	C	T	0.855329	0.0181253	0.00295194	1.8e-10	-0.000552905	0.00103766	0.59
rs769070623	1	21945933	AAGAC	A	0.849716	0.0211717	0.00290174	1.3e-13	-0.000467634	0.00101983	0.65
rs747662	1	21947218	C	G	0.0896411	0.0234257	0.00361741	3.3e-11	-0.000296365	0.0012707	0.82
rs1317653	1	21951550	G	A	0.857197	0.0190976	0.00295917	2.6e-11	-0.000346735	0.0010401	0.74
rs1318236	1	21952024	C	T	0.50458	0.0218171	0.00207157	3e-27	-0.00178637	0.000729051	0.014
rs10917025	1	21952590	G	A	0.783202	0.015607	0.00250401	1.2e-10	-0.00133546	0.000881214	0.13
rs12039278	1	21953026	A	C	0.890611	0.0262076	0.00330317	2.3e-16	-0.00295753	0.00115992	0.011
rs1531829	1	21953304	G	A	0.642188	0.0141508	0.00215818	3.1e-11	-0.00185301	0.000759221	0.015
rs12567723	1	21954666	G	A	0.894659	-0.0189974	0.00336099	6.1e-09	0.0018887	0.00119079	0.11
rs829413	1	21956050	C	G	0.893386	-0.0191034	0.0033445	4.5e-09	0.00187968	0.00118473	0.11
rs16825734	1	21956199	C	A	0.893921	-0.0191413	0.00335111	4.5e-09	0.00186164	0.00118688	0.12
rs199787255	1	21956759	C	CT	0.684206	0.0178844	0.00225376	5.6e-16	-0.00196011	0.000792899	0.013
rs829382	1	21957747	G	C	0.89335	-0.0190655	0.00334231	4.8e-09	0.00182528	0.00118404	0.12
rs10799705	1	21958587	G	A	0.170463	0.0165883	0.00274366	4.2e-10	0.000164414	0.000966773	0.86
rs1557087	1	21959015	G	T	0.170417	0.0165958	0.00274386	4.1e-10	0.000161582	0.000966844	0.87
rs74314900	1	21959265	A	AGTG	0.456631	0.0128711	0.00207476	1.5e-10	0.000290757	0.000730481	0.69
rs1557085	1	21959266	C	A	0.456504	0.0128624	0.0020717	1.3e-10	0.000238758	0.000729411	0.74
rs9426772	1	21959590	T	C	0.456821	0.0128357	0.00207051	1.3e-10	0.000280722	0.000729021	0.7
rs6671920	1	21960032	G	A	0.890944	0.026132	0.00331253	4.4e-16	-0.00301721	0.00116366	0.0095
rs6660927	1	21960044	A	C	0.890931	0.0262063	0.00331234	3.7e-16	-0.00303049	0.0011636	0.0092
rs12090311	1	21960194	G	T	0.893389	-0.0189999	0.003341	5.5e-09	0.00185823	0.00118366	0.12
rs12045185	1	21961338	G	A	0.891676	0.0257867	0.00332491	1.7e-15	-0.00314524	0.00116808	0.0071
rs6679565	1	21962551	G	A	0.893005	-0.0190447	0.0033364	5.2e-09	0.00194466	0.00118207	0.1
rs4654761	1	21964802	C	T	0.0822587	0.0231427	0.00376708	3.7e-10	0.000344787	0.00132277	0.79
rs6658321	1	21968660	C	T	0.894727	-0.0192776	0.00336781	4.3e-09	0.00196844	0.00119223	0.099
rs7531180	1	21969922	A	G	0.125867	0.0217172	0.00312529	5.6e-13	-0.000491899	0.00109864	0.65
rs59067252	1	21970965	A	G	0.891727	0.0259182	0.00334241	1.5e-15	-0.0031981	0.00117381	0.0064
rs10157126	1	21973835	T	C	0.816435	0.0238446	0.00269714	6.8e-20	-0.0030975	0.000948084	0.0011
rs10159452	1	21973914	A	C	0.817011	0.0240407	0.00270076	4.2e-20	-0.00314413	0.000949197	0.00092
rs79843678	1	21974545	G	A	0.87039	0.0250207	0.00313499	2.1e-16	-0.00241754	0.00109739	0.028
rs9426676	1	21975180	C	G	0.794523	-0.0156616	0.00262638	2e-09	0.00254194	0.00092501	0.006
rs16825755	1	21975214	A	G	0.85218	0.0256218	0.00296106	8.3e-19	-0.00324477	0.00103862	0.0018
rs181939530	1	21978465	G	A	0.84557	0.0272496	0.00302633	5.5e-21	-0.00309454	0.00106181	0.0036
rs75141928	1	21978648	A	G	0.620365	0.0162216	0.00218869	4.8e-14	-0.00292032	0.000769318	0.00015
rs2625408	1	21979230	C	T	0.364719	0.0127469	0.00214138	4.3e-10	-0.000992878	0.000754446	0.19
rs3767123	1	21979984	G	A	0.856258	0.0209405	0.00299035	1.6e-12	-0.0024283	0.00104816	0.021
rs28669944	1	21982918	A	C	0.888493	0.0278147	0.00341715	1.3e-16	-0.00232666	0.00119553	0.052
rs12038642	1	21985995	C	T	0.855956	0.0213855	0.00295093	1.8e-13	-0.00213987	0.00103338	0.038
rs12036106	1	21998838	C	T	0.861706	0.0261428	0.00300775	3e-19	-0.00248424	0.00105262	0.018
rs3767132	1	22006721	G	A	0.798629	0.0182683	0.00270192	6.7e-12	-0.00190053	0.000947892	0.045
rs12749743	1	22009088	G	A	0.777089	0.0143744	0.00249755	1.5e-09	0.000634131	0.000879892	0.47
rs12043791	1	22012526	C	T	0.834414	0.0237591	0.00279443	1.5e-18	-0.00320008	0.000980003	0.0011
rs56167338	1	22033228	G	A	0.782377	0.0140793	0.00250087	1.9e-09	0.000553095	0.000881602	0.53
rs12029478	1	22047275	C	T	0.831757	0.0254945	0.00275667	7.7e-21	-0.00303479	0.000966572	0.0017
rs12030578	1	22048664	C	T	0.832579	0.0252436	0.00275811	2.4e-20	-0.00311672	0.000967194	0.0013
rs6426724	1	22049667	A	G	0.325687	0.014789	0.00219971	4.4e-12	-0.00107017	0.000775881	0.17
rs16825896	1	22054427	C	A	0.335116	0.0156434	0.00218421	9.1e-14	-0.00105381	0.000770521	0.17
1:22058762_ACT_A	1	22058762	ACT	A	0.333696	0.0157236	0.00218984	1e-13	-0.00106141	0.000772517	0.17
rs10753517	1	22063149	G	A	0.325761	0.0148501	0.00219906	3.8e-12	-0.00105938	0.000775648	0.17
rs138415400	1	22064498	C	T	0.982588	-0.0462185	0.00803243	5.3e-09	0.00329497	0.00278921	0.24
rs7541528	1	22065128	G	C	0.325488	0.014883	0.00219981	3.5e-12	-0.00107778	0.000775861	0.16
rs114054970	1	22067361	G	A	0.963347	0.0352064	0.00561203	1.4e-10	-0.00560535	0.00195989	0.0042
rs150784973	1	22074348	G	A	0.976772	-0.0390197	0.00722854	5.7e-09	0.00696269	0.00254025	0.0061
rs7538354	1	22076638	C	T	0.325736	0.0148134	0.00219892	4.3e-12	-0.00105996	0.000775604	0.17
rs2315931	1	22076705	G	A	0.240205	0.0148876	0.00241197	3.6e-10	-0.000334934	0.000850874	0.69
rs10917040	1	22082664	T	A	0.322783	0.0147793	0.00221255	6.9e-12	-0.00102822	0.000780462	0.19
rs10458383	1	22082794	T	C	0.240197	0.0147915	0.00241201	4.5e-10	-0.00032057	0.000850887	0.71
rs10458384	1	22082923	G	A	0.240196	0.0147962	0.002412	4.4e-10	-0.000317602	0.000850888	0.71
rs6667223	1	22088841	G	A	0.335432	0.0157987	0.00218258	5.8e-14	-0.00102316	0.000769965	0.18
rs74582510	1	22090675	A	G	0.97338	-0.0403084	0.00671615	1.1e-10	0.00560304	0.00236127	0.018
rs10917041	1	22098940	C	T	0.832666	0.0255739	0.00276447	7.2e-21	-0.0029144	0.000969445	0.0026
rs10753519	1	22100963	C	T	0.325707	0.0147809	0.00220034	5.9e-12	-0.00104649	0.000776083	0.18
rs113690053	1	22103564	C	T	0.878481	0.0247096	0.00323623	1.3e-15	-0.00264087	0.00113296	0.02
rs10799714	1	22103637	C	T	0.325997	0.0147931	0.00220027	5.5e-12	-0.00105014	0.000776059	0.18
1:22104465_CAA_C	1	22104465	CAA	C	0.281942	0.0129919	0.00230636	5.6e-09	-0.000450832	0.000813191	0.58
rs10733030	1	22104971	A	G	0.240018	0.0148775	0.00241442	4e-10	-0.000359244	0.00085172	0.67
rs6664248	1	22105568	C	T	0.33496	0.0160005	0.00218729	3.8e-14	-0.00112308	0.000771551	0.15
rs7519675	1	22106875	A	G	0.331166	0.0162395	0.00219318	2e-14	-0.00118469	0.000773693	0.13
rs10917042	1	22109370	G	A	0.760209	0.0188045	0.00241082	2.6e-15	-0.00248965	0.000848407	0.0033
rs41266001	1	22110155	G	A	0.96427	0.0345919	0.00555593	1.8e-10	-0.00509053	0.00194088	0.0087
1:22111508_AAAC_A	1	22111508	AAAC	A	0.34049	0.015775	0.00218312	5.6e-14	-0.00117453	0.000770046	0.13
rs12024158	1	22114472	G	A	0.832744	0.0256089	0.00276195	5.2e-21	-0.00310578	0.000968658	0.0013
rs12742048	1	22114970	G	A	0.33982	0.0155681	0.00218232	1.1e-13	-0.00124448	0.000769782	0.11
rs4654985	1	22118218	C	T	0.251015	0.0143001	0.00238377	9.5e-10	-0.000589572	0.000841071	0.48
rs12030290	1	22118671	C	T	0.832712	0.0252966	0.00276549	2.2e-20	-0.00298965	0.000969853	0.0021
rs12127735	1	22120540	C	T	0.25039	0.0136647	0.00238812	5.4e-09	-0.00080387	0.000842839	0.34
rs10917046	1	22123310	C	T	0.250749	0.0137407	0.00238661	4.8e-09	-0.000784727	0.000842433	0.35
rs10917047	1	22124166	C	T	0.250812	0.0137356	0.00238667	4.4e-09	-0.000791205	0.000842415	0.35
rs201846935	1	22125965	G	GT	0.880777	-0.0194175	0.00323099	1.8e-09	0.000789831	0.00113907	0.49
rs55899405	1	22129361	A	G	0.853404	0.026863	0.00291483	3.7e-21	-0.00277445	0.00102135	0.0066
rs28719178	1	22130013	T	G	0.250573	0.0141891	0.00238993	1.4e-09	-0.000788159	0.000843238	0.35
rs12029547	1	22130063	G	A	0.249952	0.0143706	0.00240054	9.4e-10	-0.000758998	0.000847358	0.37
rs10917049	1	22135952	C	T	0.818574	0.0227293	0.00269571	3.4e-17	-0.00256339	0.000945424	0.0067
rs10737461	1	22137861	C	T	0.322037	0.0145241	0.00221001	2.8e-12	-0.00128553	0.000778615	0.099
rs6656070	1	22138467	C	G	0.32147	0.0144305	0.00220546	2.6e-12	-0.00130639	0.000776815	0.093
rs10917050	1	22139796	A	T	0.818876	0.0226793	0.0026883	2.6e-17	-0.00254402	0.000943206	0.007
1:22140369_CT_C	1	22140369	CT	C	0.324041	0.0163115	0.00241389	9e-13	-0.000868587	0.000850039	0.31
rs10917051	1	22141206	A	C	0.313187	0.0134686	0.00222045	7.6e-11	-0.00131077	0.000782555	0.094
rs72662412	1	22143437	A	C	0.809169	0.0224473	0.0026094	6.1e-18	-0.00249443	0.000916004	0.0065
rs12184330	1	22143665	C	T	0.820233	0.0218637	0.00268946	4.7e-16	-0.00271069	0.000943586	0.0041
rs897467	1	22149935	T	C	0.181887	-0.0154614	0.00272398	5e-09	0.00149672	0.000956887	0.12
rs72662421	1	22169134	G	A	0.868079	0.0194851	0.0031001	1.5e-09	-0.00306257	0.00108786	0.0049
rs114945908	1	22248241	G	A	0.981106	0.0397572	0.00763195	3.7e-09	-0.00611273	0.00266213	0.022
rs115702407	1	22248738	G	A	0.980931	0.0391289	0.00758535	3.6e-09	-0.00643908	0.00264631	0.015
rs7512059	1	22251607	C	T	0.980896	0.0392652	0.00757955	3e-09	-0.00634661	0.00264408	0.016
[truncated: 140,419 more rows]
